# Supplementary material for: Visible light-driven carbamoyloxylation of the α-C(sp3)–H bond of arylacetones via radical-initiated hydrogen atom transfer
Source: Royal Society of Chemistry journal article supplement (doi:10.1039/d2cc01761j), 2022-01-01
Supplement: d2cc01761j1.pdf [file d2cc01761j1.pdf]

## Supporting Information for

### Visible light-driven carbamoyloxylation of $\alpha$ -C(sp<sup>3</sup>)-H bond of arylacetonates via radical-initiated hydrogen atom transfer

Xing He,<sup>‡</sup> Xiangyang Yao,<sup>‡</sup> Shuai-Fang Cai, Hong-Ru Li, Liang-Nian He\*

E-mail: heln@nankai.edu.cn

Fax: (+86) 22-23503878; Tel: (+86) 22-23503878

### Table of Contents

|                                                                                        |    |
|----------------------------------------------------------------------------------------|----|
| <b>I. General Information</b> .....                                                    | 2  |
| <b>II. Reaction Conditions Optimization, Scale-Up and Controlled Experiments</b> ..... | 3  |
| <b>III. General Procedure for the Synthesis of Organic Carbamates</b> .....            | 7  |
| <b>IV. Characterization Data of Products</b> .....                                     | 7  |
| <b>V. References</b> .....                                                             | 57 |

## I. General Information

Unless otherwise indicated, all reagents and carbon dioxide gas (purity 99.999%) were purchased from commercial sources and used without further treatment. Photoreactions were carried out using a 23 W household compact fluorescent lamp (CFL). The products were isolated by column chromatography on silica gel (200-300 mesh) using petroleum ether (60-90 °C) and ethyl acetate. <sup>1</sup>H and <sup>13</sup>C NMR spectra were recorded on a Bruker 400 MHz spectrometer at 20 °C. All <sup>1</sup>H NMR spectra were reported in parts per million (ppm) downfield of TMS and measured relative to the signals for CDCl<sub>3</sub> (7.26 ppm) with <sup>1</sup>H decoupling. Coupling constants, *J*, were reported in hertz (Hz). Multiplets were assigned as singlet (s), doublet (d), triplet (t), doublet of doublet (dd), and multiplet (m). <sup>13</sup>C NMR were recorded at 100 MHz relative to CDCl<sub>3</sub> (77.16 ppm). GC analyses were performed on a Shimadzu GC-2014 equipped with a capillary column (RTX-50 30 m × 0.25 μm) using a flame ionization detector. Mass spectra of GC-MS were recorded on a Shimadzu GCMS-QP2010 equipped with an RTX-5MS capillary column at an ionization voltage of 70 eV, the data were given as mass units per charge (*m/z*). FT-IR spectra were recorded on a Bruker Tensor 27 FT-IR spectrophotometer with KBr pellets. High-resolution mass spectra (HR-MS) were obtained with a Waters-Q-TOF-Premier (ESI).

## II. Reaction Conditions Optimization, Scale-Up and Controlled Experiments

Table S1. Effect of the base<sup>a</sup>

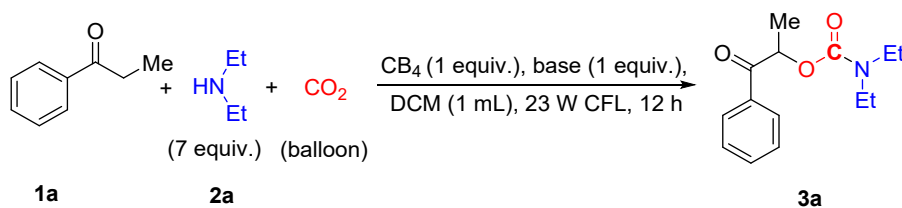

| Entry | Base                     | $\text{p}K_{\text{a}}$ (in MeCN) | Yield ( <b>3a</b> ) (%) | Con. ( <b>1a</b> ) (%) |
|-------|--------------------------|----------------------------------|-------------------------|------------------------|
| 1     | -                        | -                                | 21                      | 44                     |
| 2     | TMG                      | 23.3                             | 35                      | 88                     |
| 3     | DBU                      | 23.9                             | 17                      | 40                     |
| 4     | TBD                      | 24.7                             | 8                       | 75                     |
| 5     | TEOA                     | 15.9                             | 3                       | 40                     |
| 6     | <i>t</i> BuOK            | -                                | 23                      | 82                     |
| 7     | $\text{Cs}_2\text{CO}_3$ | -                                | 14                      | 46                     |
| 8     | $\text{Na}_2\text{CO}_3$ | -                                | 10                      | 52                     |
| 9     | NaOH                     | -                                | 23                      | 73                     |

<sup>a</sup> Unless otherwise noted, all the reactions were performed with **1a** (33.5 mg, 0.25 mmol),  $\text{CBr}_4$  (82.9 mg, 0.25 mmol), base (0.25 mmol), **2a** (127.9 mg, 1.75 mmol), in 1 mL  $\text{CH}_2\text{Cl}_2$  at room temperature under  $\text{CO}_2$  (1 bar) with a 23 W CFL lamps for 12 h. The yield and conversion were determined by GC with 1,3,5-methoxybenzene as internal standard.

**Table S2. Screening of the bromine source<sup>a</sup>**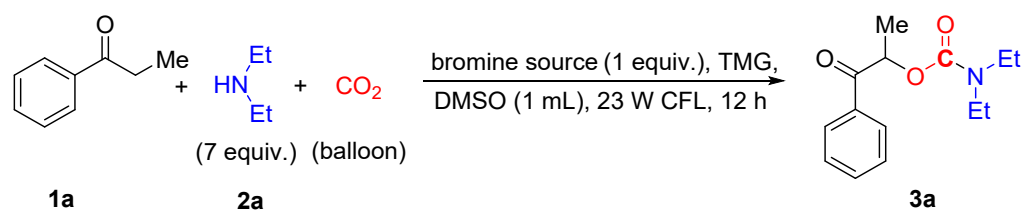

| Entry           | Bromine source      | BDE <sub>C/N-Br</sub> (kcal/mol) | Yield<br>( <b>3a</b> ) (%) | Con.<br>( <b>1a</b> ) (%) |
|-----------------|---------------------|----------------------------------|----------------------------|---------------------------|
| 1               | CBr <sub>4</sub>    | 56.2                             | 38                         | 67                        |
| 2               | CHBr <sub>3</sub>   | 64.8                             | trace                      | 8                         |
| 3               | NBS                 | 66                               | trace                      | 31                        |
| 4               | CCl <sub>3</sub> Br | 55.7                             | 33                         | 59                        |
| 5               | Br <sub>2</sub>     | -                                | trace                      | 2                         |
| 6               | PHP                 | -                                | 26                         | 82                        |
| 7               | DBDMH               | -                                | 3                          | 50                        |
| 8               | NBSA                | 48                               | 1                          | 17                        |
| 9 <sup>b</sup>  | CBr <sub>4</sub>    | 56.2                             | 28                         | 53                        |
| 10 <sup>c</sup> | CBr <sub>4</sub>    | 56.2                             | 15                         | 82                        |
| 11 <sup>d</sup> | CBr <sub>4</sub>    | 56.2                             | 14                         | 87                        |

<sup>a</sup> Unless otherwise noted, all the reactions were performed with **1a** (33.5 mg, 0.25 mmol), bromine source (0.25 mmol), TMG (28.8 mg, 0.25 mmol), **2a** (127.9 mg, 1.75 mmol) in 1 mL DMSO at room temperature under CO<sub>2</sub> (1 bar) with a 23 W CFL lamps for 12 h. The yield and conversion were determined by GC with 1,3,5-methoxybenzene as internal standard. NBS = *N*-bromosuccinimide, PHP = pyridine hydrobomide perbromide, DBDMH = 1,3-dibromo-5,5-dimethylhydantoin, NBSA = *N*-bromosaccharin. BDE data comes from ref S1-4. <sup>b</sup>CBr<sub>4</sub> (41.5 mg, 0.125 mmol). <sup>c</sup>CBr<sub>4</sub> (124.4 mg, 0.375 mmol). <sup>d</sup>CBr<sub>4</sub> (165.8 mg, 0.50 mmol).

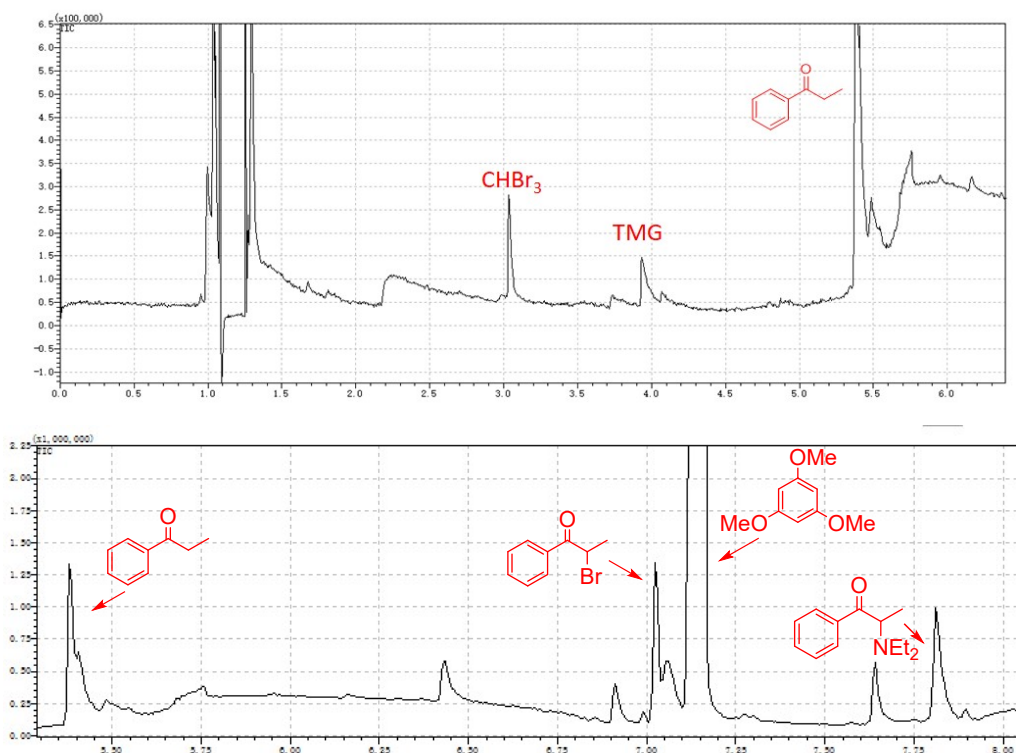

**Figure S1.** The detection of byproducts by GC-MS

**Table S3.** Effects of the loading of TMG and reaction time<sup>a</sup>

CC(=O)c1ccccc1 + CCN(CC) + CO2
 $\xrightarrow[\text{DMSO (1 mL), 23 W CFL}]{\text{CBr}_4 \text{ (1 equiv.), TMG}}$ 
CCOC(=O)C(c1ccccc1)C

**1a**                      **2a**                      **3a**

(7 equiv.) (balloon)

| Entry | TMG (equiv.) | Time (h) | Yield<br>( <b>3a</b> ) (%) | Con.<br>( <b>1a</b> ) (%) |
|-------|--------------|----------|----------------------------|---------------------------|
| 1     | 1            | 12       | 38                         | 67                        |
| 2     | 2            | 12       | 42                         | 55                        |
| 3     | 3            | 12       | 42                         | 72                        |
| 4     | 5            | 12       | 47                         | 72                        |
| 5     | 7            | 12       | 43                         | 77                        |
| 6     | 2            | 2        | 33                         | 61                        |
| 7     | 2            | 4        | 41                         | 62                        |
| 8     | 2            | 6        | 42                         | 65                        |
| 9     | 2            | 8        | 40                         | 62                        |
| 10    | 2            | 10       | 42                         | 61                        |

<sup>a</sup> Unless otherwise noted, all the reactions were performed with **1a** (33.5 mg, 0.25 mmol), bromine source (82.9 mg, 0.25 mmol), TMG (28.8 mg, 0.25 mmol), **2a** (127.9 mg, 1.75 mmol) in 1 mL DMSO at room temperature under CO<sub>2</sub> (1 bar) with a 23 W CFL lamps for 12 h. The yield and conversion were determined by GC with 1,3,5-methoxybenzene as the internal standard.

## Scheme S1. A scale-up experiment

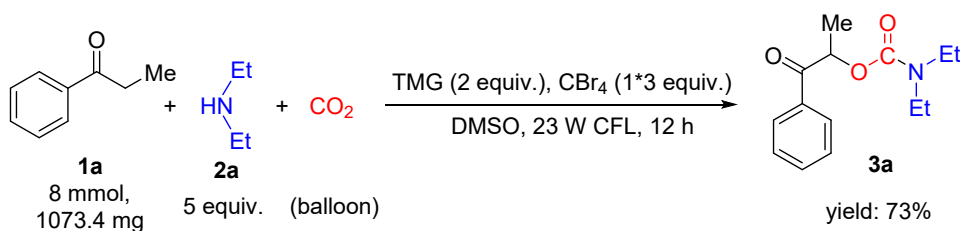

## Scheme S2. Studies on the reaction intermediates

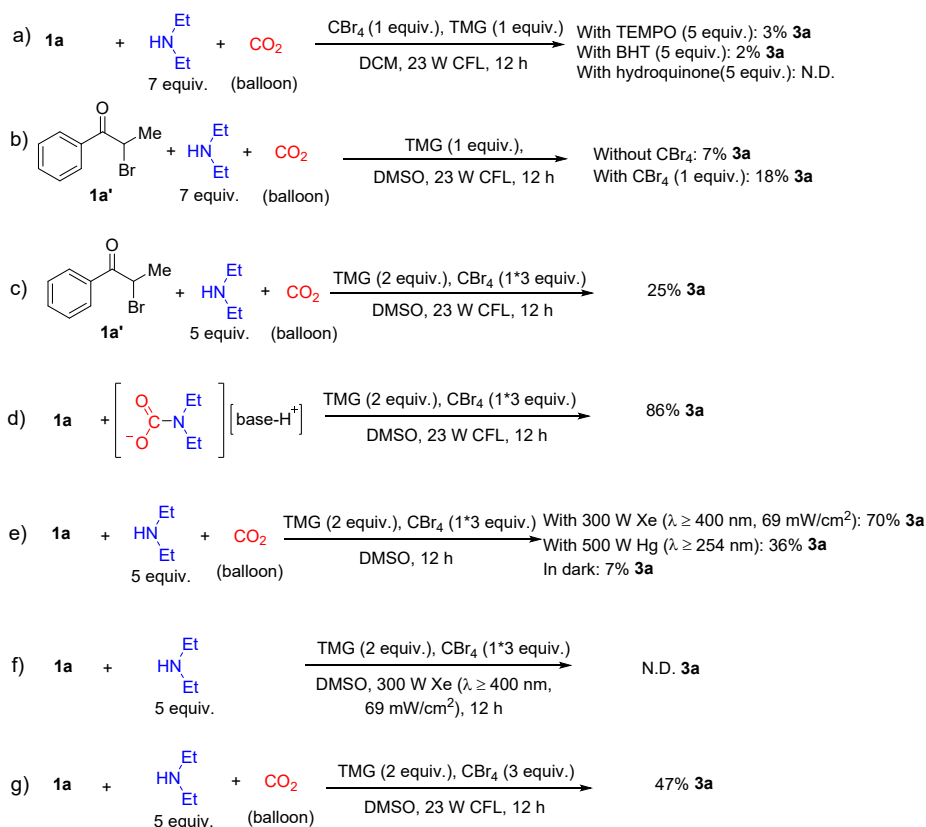

## Scheme S3. Substrate scope of primary amines

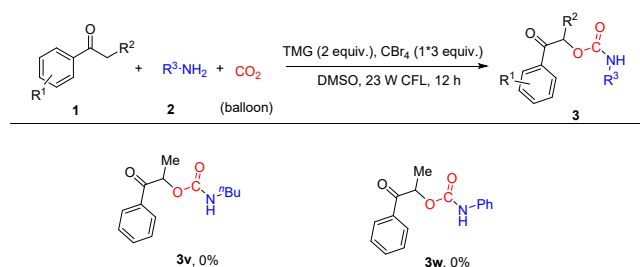

The reaction conditions with the stepwise addition procedure in equal amount for three times: **1** (0.25 mmol), **2** (1.25 mmol), TMG (57.6 mg, 0.5 mmol), and  $CBr_4$  (248.7 mg, 0.25\*3 mmol) in DMSO (1 mL) at r.t. under  $CO_2$  (1 bar) with a 23 W CFL for 12 h.

### III. General Procedure for the Synthesis of Organic Carbamates

**1** (33.5 mg, 0.25 mmol), **2** (91.4 mg, 1.25 mmol, 5 equiv.), TMG (28.8 mg, 0.5 mmol, 2 equiv.), and 1 mL DMSO were added successively in a 10 mL Schlenk tube, followed by bubbling CO<sub>2</sub> in an ice-water bath for 10 min. One single step was set to add CBr<sub>4</sub> (82.9 mg, 0.25 mmol, 1 equiv.) to the tube equipped with an extra CO<sub>2</sub> balloon vertically at 10 cm from 23 W CFL and stirred for 4 h. Such a single process was performed for three times in succession, which means 3 equiv. CBr<sub>4</sub> was added in total and illuminated for 12 h altogether. Upon completion, the mixture was quenched with distilled water (30 mL) and extracted with ethyl acetate (3 × 30 mL). The combined organic layers were dried over anhydrous Mg<sub>2</sub>SO<sub>4</sub>, and the solvent was removed under reduced pressure. The residue was purified by column chromatography on silica gel to offer the product **3**. The scaled-up experiment was conducted with phenylacetone (1073.4 mg, 8 mmol), diethylamine (2925.6 mg, 40 mmol, 5 equiv.), TMG (1842.9 mg, 16 mmol, 2 equiv.), CBr<sub>4</sub> (2652.8 mg, 8 × 3 mmol, 1 equiv.), and 20 mL DMSO in a 50 mL Schlenk flask with other operation unchanged.

### IV. Characterization Data of Products

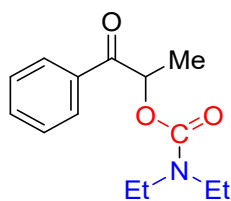

**3a**

**1-oxo-1-phenylpropan-2-yl diethylcarbamate (compound 3a): Light yellow oil.**

<sup>1</sup>H NMR (400 MHz, CDCl<sub>3</sub>): δ 7.95 (d, *J* = 8.0 Hz, 2H), 7.55 (t, *J* = 8.0 Hz, 1H), 7.45 (t, *J* = 8.0 Hz, 2H), 5.94 (q, *J* = 7.0 Hz, 1H), 3.32-3.23 (m, 4H), 1.50 (d, *J* = 7.0 Hz, 3H), 1.16-1.08 (m, 6H); <sup>13</sup>C NMR (100 MHz, CDCl<sub>3</sub>): δ 198.9, 155.2, 134.9, 133.4, 128.2, 128.6, 71.7, 42.1, 41.6, 17.3, 14.1, 13.5; IR (KBr): 3064, 2979, 2935, 1695, 1597, 1429, 1275, 1173, 1098, 962, 778, 702 cm<sup>-1</sup>. HRMS (ESI) *m/z*: [M + H]<sup>+</sup> Calcd for C<sub>14</sub>H<sub>20</sub>NO<sub>3</sub> 250.1443; Found 250.1436.

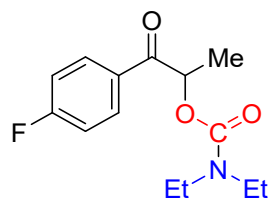

**3b**

**1-(4-fluorophenyl)-1-oxopropan-2-yl diethylcarbamate (compound 3b): Yellow oil.**  $^1\text{H}$  NMR (400 MHz,  $\text{CDCl}_3$ ):  $\delta$  7.99 (dd,  $J = 8.9, 5.4$  Hz, 2H), 7.13 (t,  $J = 8.6$  Hz, 2H), 5.89 (d,  $J = 7.0$  Hz, 1H), 3.32-3.22 (m, 4H), 1.49 (d,  $J = 7.0$  Hz, 3H), 1.15-1.01 (m, 6H);  $^{13}\text{C}$  NMR (100 MHz,  $\text{CDCl}_3$ ):  $\delta$  196.8, 167.2, 164.7, 155.2, 131.3, 131.3, 116.1, 115.9, 71.5, 42.1, 41.6, 17.3, 14.1, 13.5; IR (KBr): 3074, 2977, 2935, 1697, 1599, 1429, 1273, 1230, 1174, 1098, 962, 848, 788, 702  $\text{cm}^{-1}$ . HRMS (ESI)  $m/z$ :  $[\text{M} + \text{H}]^+$  Calcd for  $\text{C}_{14}\text{H}_{19}\text{FNO}_3$  268.1349; Found 268.1340.

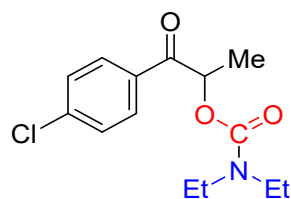

**3c**

**1-(4-chlorophenyl)-1-oxopropan-2-yl diethylcarbamate (compound 3c): Yellow oil.**  $^1\text{H}$  NMR (400 MHz,  $\text{CDCl}_3$ ):  $\delta$  7.89 (d,  $J = 8.1$  Hz, 2H), 7.42 (d,  $J = 8.2$  Hz, 2H), 5.86 (q,  $J = 6.9$  Hz, 1H), 3.31-3.24 (m, 4H), 1.48 (d,  $J = 6.9$  Hz, 3H), 1.11 (t,  $J = 8.0$  Hz, 6H);  $^{13}\text{C}$  NMR (100 MHz,  $\text{CDCl}_3$ ):  $\delta$  197.2, 155.1, 139.8, 133.3, 130.0, 129.1, 71.6, 42.1, 41.6, 17.2, 14.1, 13.5. IR (KBr): 3078, 2978, 2926, 1697, 1592, 1475, 1427, 1268, 1172, 1087, 964, 840, 763  $\text{cm}^{-1}$ . HRMS (ESI)  $m/z$ :  $[\text{M} + \text{H}]^+$  Calcd for  $\text{C}_{14}\text{H}_{19}\text{ClNO}_3$  284.1053; Found 284.1045.



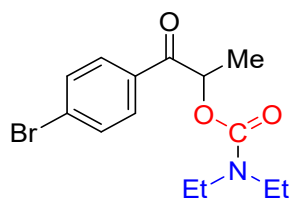

**3d**

**1-(4-bromophenyl)-1-oxopropan-2-yl diethylcarbamate (compound 3d): Yellow oil.**  $^1\text{H}$  NMR (400 MHz,  $\text{CDCl}_3$ ):  $\delta$  7.82 (d,  $J = 8.4$  Hz, 2H), 7.60 (d,  $J = 8.4$  Hz, 2H), 5.86 (q,  $J = 6.9$  Hz, 1H), 3.32-3.21 (m, 4H), 1.49 (d,  $J = 7.0$  Hz, 3H), 1.12 (m, 6H);  $^{13}\text{C}$  NMR (100 MHz,  $\text{CDCl}_3$ ):  $\delta$  197.4, 155.1, 133.7, 132.1, 130.1, 128.6, 71.6, 42.1, 41.6, 17.2, 14.1, 13.5. IR (KBr): 2959, 2917, 1701, 1586, 1463, 1375, 1272, 1160, 1097, 1025, 825  $\text{cm}^{-1}$ . HRMS (ESI)  $m/z$ :  $[\text{M} + \text{H}]^+$  Calcd for  $\text{C}_{14}\text{H}_{19}\text{BrNO}_3$  328.05483; Found 328.05435.

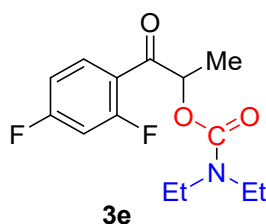

**3e**

**1-(2,4-difluorophenyl)-1-oxopropan-2-yl diethylcarbamate (compound 3e): Yellow oil.**  $^1\text{H}$  NMR (400 MHz,  $\text{CDCl}_3$ ):  $\delta$  7.96 (dd,  $J = 8.5, 6.6$  Hz, 2H), 7.00-6.96 (t,  $J = 8.2$  Hz, 2H), 6.90-6.85 (m, 1H), 5.71 (q,  $J = 7.8, 6.9$  Hz, 1H), 3.35-3.22 (m, 4H), 1.50 (t,  $J = 6.9$  Hz, 3H), 1.14 (m, 6H);  $^{13}\text{C}$  NMR (100 MHz,  $\text{CDCl}_3$ ):  $\delta$  195.5 (d,  $J = 20$  Hz), 167.3 (d,  $J = 12$  Hz), 164.8 (d,  $J = 13$  Hz), 163.5 (d,  $J = 12$  Hz), 161.0 (d,  $J = 12$  Hz), 155.2, 133.3 (q,  $J = 5$  Hz), 120.3 (dd,  $J = 4, 11$  Hz), 112.5 (dd,  $J = 4, 18$  Hz), 104.8 (dd,  $J = 25, 8$  Hz), 74.7 (d,  $J = 8$  Hz), 42.1, 41.6, 32.1, 16.4, 14.1, 13.5. IR (KBr): 3073, 2978, 2935, 1698, 1611, 1427, 1270, 1172, 1095, 975, 854, 778  $\text{cm}^{-1}$ . HRMS (ESI)  $m/z$ :  $[\text{M} + \text{H}]^+$  Calcd for  $\text{C}_{14}\text{H}_{18}\text{F}_2\text{NO}_3$  286.1255; Found 286.1244.

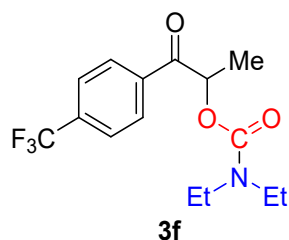

**1-oxo-1-(4-(trifluoromethyl)phenyl)propan-2-yl diethylcarbamate (compound 3f):**

**Light yellow oil.**  $^1\text{H}$  NMR (400 MHz,  $\text{CDCl}_3$ ):  $\delta$  8.05 (d,  $J = 8.1$  Hz, 2H), 7.72 (d,  $J = 8.1$  Hz, 2H), 5.89 (q,  $J = 7.0$  Hz, 1H), 3.32-3.21 (m, 4H), 1.51 (d,  $J = 7.0$  Hz, 3H), 1.16-1.07 (m, 6H);  $^{13}\text{C}$  NMR (100 MHz,  $\text{CDCl}_3$ ):  $\delta$  197.7, 155.1, 138.0, 134.6 (d,  $J = 32$  Hz), 128.9, 125.6 (q,  $J = 4$  Hz), 122.3, 71.9, 42.2, 41.7, 17.0, 14.1, 13.5. IR (KBr):  $\text{cm}^{-1}$ . IR (KBr): 3076, 2970, 1694, 1431, 1321, 1167, 1125, 1066, 961, 852, 770  $\text{cm}^{-1}$ . HRMS (ESI)  $m/z$ :  $[\text{M} + \text{H}]^+$  Calcd for  $\text{C}_{15}\text{H}_{19}\text{F}_3\text{NO}_3$  318.1317; Found 318.1307.

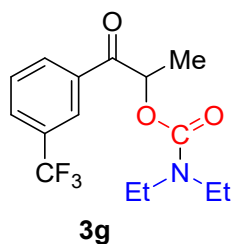

**1-oxo-1-(3-(trifluoromethyl)phenyl)propan-2-yl diethylcarbamate (compound 3g):**

**Light yellow oil.**  $^1\text{H}$  NMR (400 MHz,  $\text{CDCl}_3$ ):  $\delta$  8.21 (s, 1H), 8.14 (d,  $J = 7.8$  Hz, 1H), 7.81 (d,  $J = 7.8$  Hz, 1H), 7.61 (t,  $J = 7.8$  Hz, 1H), 5.88 (q,  $J = 7.0$  Hz, 1H), 3.34-3.27 (m, 4H), 1.53 (d,  $J = 7.0$  Hz, 3H), 1.16-1.07 (m, 6H);  $^{13}\text{C}$  NMR (100 MHz,  $\text{CDCl}_3$ ):  $\delta$  197.3, 155.1, 135.6, 131.8, 129.7 (d,  $J = 3.6$  Hz), 129.5, 125.5 (d,  $J = 5$  Hz), 72.0, 42.2, 41.6, 17.1, 14.1, 13.5. IR (KBr): 3075, 2981, 1702, 1430, 1332, 1172, 1132, 970, 695  $\text{cm}^{-1}$ . HRMS (ESI)  $m/z$ :  $[\text{M} + \text{H}]^+$  Calcd for  $\text{C}_{15}\text{H}_{19}\text{F}_3\text{NO}_3$  318.1317; Found 318.1308.

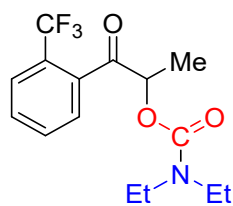

**3h**

**1-oxo-1-(2-(trifluoromethyl)phenyl)propan-2-yl diethylcarbamate (compound 3h):** Light yellow oil.  $^1\text{H}$  NMR (400 MHz,  $\text{CDCl}_3$ ):  $\delta$  7.79 (d,  $J = 7.4$  Hz, 1H), 7.73 (d,  $J = 7.5$  Hz, 1H), 7.58 (m, 2H), 5.73 (q,  $J = 7.0$  Hz, 1H), 3.26-3.20 (m, 4H), 1.45 (d,  $J = 7.0$  Hz, 3H), 1.09-1.01 (m, 6H);  $^{13}\text{C}$  NMR (100 MHz,  $\text{CDCl}_3$ ):  $\delta$  202.0, 155.0, 137.5, 131.8, 130.7, 128.2, 127.0 (q,  $J = 5$  Hz), 123.5 (d,  $J = 272$  Hz), 74.3, 42.1, 41.5, 16.3, 13.9, 13.5. IR (KBr): 3073, 2981, 1701, 1429, 1315, 1170, 1138, 956, 772  $\text{cm}^{-1}$ . HRMS (ESI)  $m/z$ :  $[\text{M} + \text{H}]^+$  Calcd for  $\text{C}_{15}\text{H}_{19}\text{F}_3\text{NO}_3$  318.1317; Found 318.1307.

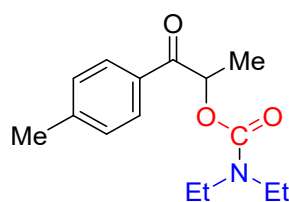

**3i**

**1-oxo-1-(p-tolyl)propan-2-yl diethylcarbamate (compound 3i):** Light yellow oil.  $^1\text{H}$  NMR (400 MHz,  $\text{CDCl}_3$ ):  $\delta$  7.79 (d,  $J = 8.2$  Hz, 2H), 7.18 (d,  $J = 8.1$  Hz, 2H), 5.87 (q,  $J = 7.0$  Hz, 1H), 3.26-3.15 (m, 4H), 2.33 (s, 3H), 1.42 (d,  $J = 7.0$  Hz, 3H), 1.10-1.02 (m, 6H);  $^{13}\text{C}$  NMR (100 MHz,  $\text{CDCl}_3$ ):  $\delta$  197.8, 155.2, 144.2, 132.3, 129.4, 128.7, 71.6, 42.0, 41.6, 21.8, 17.5, 14.1, 13.6. IR (KBr): 2977, 1697, 1428, 1273, 1172, 1096, 962, 771  $\text{cm}^{-1}$ . HRMS (ESI)  $m/z$ :  $[\text{M} + \text{H}]^+$  Calcd for  $\text{C}_{15}\text{H}_{22}\text{NO}_3$  264.1600; Found 264.1591.

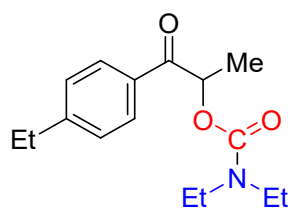

**3j**

**1-(4-ethylphenyl)-1-oxopropan-2-yl diethylcarbamate (compound 3j): Light yellow oil.** <sup>1</sup>H NMR (400 MHz, CDCl<sub>3</sub>): δ 7.82 (d, *J* = 7.2 Hz, 2H), 7.20 (d, *J* = 7.6 Hz, 2H), 5.87 (q, *J* = 7.9, 7.0 Hz, 1H), 3.25-3.17 (m, 4H), 2.62 (d, *J* = 7.6 Hz, 2H), 1.42 (d, *J* = 8.0 Hz, 3H), 1.17 (t, *J* = 8.1, 3H), 1.08-1.03 (m, 6H); <sup>13</sup>C NMR (100 MHz, CDCl<sub>3</sub>): δ 197.8, 155.2, 150.4, 132.5, 128.8, 128.3, 71.5, 42.0, 41.6, 29.1, 17.4, 15.3, 14.0, 13.5. IR (KBr): 2971, 1697, 1607, 1427, 1273, 1172, 1097, 962, 770 cm<sup>-1</sup>. HRMS (ESI) *m/z*: [M + H]<sup>+</sup> Calcd for C<sub>16</sub>H<sub>24</sub>NO<sub>3</sub> 278.1756; Found 278.1747.

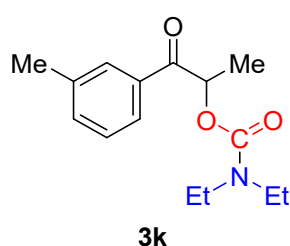

**1-oxo-1-(m-tolyl)propan-2-yl diethylcarbamate (compound 3k): Light yellow oil.** <sup>1</sup>H NMR (400 MHz, CDCl<sub>3</sub>): δ 7.75 (m, 2H), 7.34 (m, 2H), 5.93 (q, *J* = 6.9 Hz, 1H), 3.33-3.29 (m, 4H), 2.39 (s, 3H), 1.50 (d, *J* = 6.9 Hz, 3H), 1.15-1.11 (m, 6H); <sup>13</sup>C NMR (100 MHz, CDCl<sub>3</sub>): δ 198.6, 155.3, 138.6, 135.0, 134.2, 129.1, 128.7, 125.8, 71.8, 42.1, 41.6, 21.5, 17.4, 14.1, 13.6. IR (KBr): 2976, 1698, 1598, 1427, 1273, 1170, 1098, 970, 771 cm<sup>-1</sup>. HRMS (ESI) *m/z*: [M + H]<sup>+</sup> Calcd for C<sub>15</sub>H<sub>22</sub>NO<sub>3</sub> 264.1600; Found 264.1592.

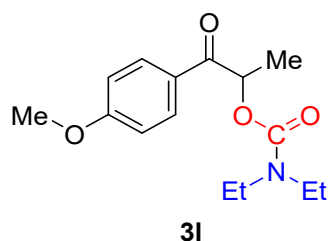

**1-(4-methoxyphenyl)-1-oxopropan-2-yl diethylcarbamate (compound 3l): Brown oil.** <sup>1</sup>H NMR (400 MHz, CDCl<sub>3</sub>): δ 7.94 (d, *J* = 8.9 Hz, 2H), 6.91 (d, *J* = 8.9 Hz, 2H), 5.91 (q, *J* = 7.0 Hz, 1H), 3.84 (s, 3H), 3.32-3.30 (m, 4H), 1.48 (d, *J* = 7.0 Hz, 3H), 1.14-1.09 (m, 6H); <sup>13</sup>C NMR (100 MHz, CDCl<sub>3</sub>): δ 196.5, 163.7, 155.2, 130.9, 127.7, 113.9, 71.3, 55.6, 42.0, 41.6, 17.4, 14.1, 13.5. IR (KBr): 2976, 1692, 1600, 1428,

1266, 1171, 1097, 962, 843, 773 $\text{cm}^{-1}$ . HRMS (ESI)  $m/z$ :  $[\text{M} + \text{H}]^+$  Calcd for  $\text{C}_{15}\text{H}_{22}\text{NO}_4$  280.1549; Found 280.1541.

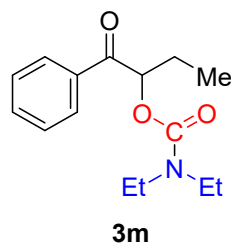

**1-oxo-1-phenylbutan-2-yl diethylcarbamate (compound 3m): Light yellow oil.**  $^1\text{H}$  NMR (400 MHz,  $\text{CDCl}_3$ ):  $\delta$  7.95 (d,  $J = 7.1$  Hz, 2H), 7.55 (t,  $J = 7.4$  Hz, 1H), 7.44 (t,  $J = 7.6$  Hz, 2H), 5.80 (dd,  $J = 8.1, 4.4$  Hz, 1H), 3.34-3.28 (m, 4H), 1.94-1.81 (m, 2H), 1.19 (br, 3H), 1.10 (br, 3H), 1.02 (t,  $J = 7.4$  Hz, 3H);  $^{13}\text{C}$  NMR (100 MHz,  $\text{CDCl}_3$ ):  $\delta$  198.0, 155.5, 135.4, 133.3, 128.8, 128.5, 76.6, 42.1, 41.7, 25.0, 14.2, 13.6, 10.1. IR (KBr): 3063, 2976, 1698, 1428, 1277, 1173, 1096, 982, 699  $\text{cm}^{-1}$ . HRMS (ESI)  $m/z$ :  $[\text{M} + \text{H}]^+$  Calcd for  $\text{C}_{15}\text{H}_{22}\text{NO}_3$  264.1600; Found 264.1592.

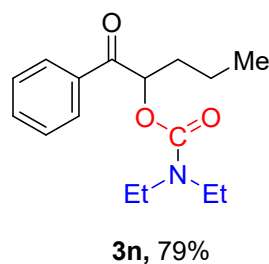

**1-oxo-1-phenylpentan-2-yl diethylcarbamate (compound 3n): Light yellow oil.**  $^1\text{H}$  NMR (400 MHz,  $\text{CDCl}_3$ ):  $\delta$  7.95 (d,  $J = 7.2$  Hz, 2H), 7.55 (t,  $J = 7.4$  Hz, 1H), 7.45 (t,  $J = 7.6$  Hz, 2H), 5.84 (t,  $J = 6.4$  Hz, 1H), 3.35-3.26 (m, 4H), 1.84-1.78 (q,  $J = 7.1, 6.7$  Hz, 2H), 1.53-1.46 (m, 2H), 1.19 (br, 3H), 1.10 (br, 3H), 0.95 (t,  $J = 7.4$  Hz, 3H);  $^{13}\text{C}$  NMR (100 MHz,  $\text{CDCl}_3$ ):  $\delta$  198.2, 155.5, 135.4, 133.3, 128.8, 128.5, 75.4, 42.1, 41.7, 33.7, 19.1, 14.2, 13.9, 13.6. IR (KBr): 3062, 2964, 2874, 1698, 1598, 1428, 1280, 1171, 1078, 970, 767, 699  $\text{cm}^{-1}$ . HRMS (ESI)  $m/z$ :  $[\text{M} + \text{H}]^+$  Calcd for  $\text{C}_{16}\text{H}_{24}\text{NO}_3$

278.1756; Found 278.1746.

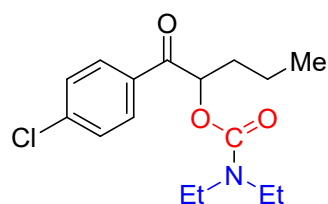

**3o**, 92%

**1-(4-chlorophenyl)-1-oxopentan-2-yl diethylcarbamate (compound 3o): Yellow oil.**  $^1\text{H}$  NMR (400 MHz,  $\text{CDCl}_3$ ):  $\delta$  7.90 (d,  $J = 8.3$  Hz, 2H), 7.43 (d,  $J = 8.3$  Hz, 2H), 5.76 (t,  $J = 6.4$  Hz, 1H), 3.37-3.26 (m, 4H), 1.82-1.77 (q,  $J = 7.3$  Hz, 2H), 1.53-1.43 (m, 2H), 1.19 (br, 3H), 1.10 (br, 3H), 0.95 (t,  $J = 7.3$  Hz, 3H);  $^{13}\text{C}$  NMR (100 MHz,  $\text{CDCl}_3$ ):  $\delta$  197.1, 155.4, 139.4, 133.8, 130.0, 129.1, 75.3, 42.2, 41.7, 33.6, 19.0, 14.2, 13.9, 13.6. IR (KBr): 3070, 2963, 1698, 1590, 1477, 1428, 1279, 1172, 1092, 970, 840, 768  $\text{cm}^{-1}$ . HRMS (ESI)  $m/z$ :  $[\text{M} + \text{H}]^+$  Calcd for  $\text{C}_{16}\text{H}_{23}\text{ClNO}_3$  312.1366; Found 312.1359.

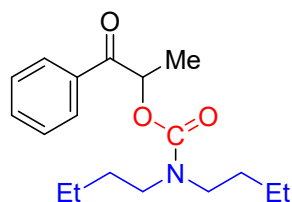

**3p**

**1-oxo-1-phenylpropan-2-yl dibutylcarbamate (compound 3p): Light yellow oil.**  $^1\text{H}$  NMR (400 MHz,  $\text{CDCl}_3$ ):  $\delta$  7.93 (d,  $J = 7.2$  Hz, 2H), 7.54 (t,  $J = 7.4$  Hz, 1H), 7.43 (t,  $J = 7.6$  Hz, 2H), 5.91 (q,  $J = 7.0$  Hz, 1H), 3.28-3.13 (m, 4H), 1.53-1.44 (m, 7H), 1.30-1.22 (m, 4H), 0.91-0.86 (m, 6H);  $^{13}\text{C}$  NMR (100 MHz,  $\text{CDCl}_3$ ):  $\delta$  198.2, 155.5, 134.9, 133.3, 128.7, 128.6, 71.7, 47.4, 46.8, 31.6, 30.7, 30.2, 29.8, 20.1, 17.2, 13.9. IR (KBr): 3060, 2966, 2872, 1698, 1598, 1423, 1223, 1099, 970, 768, 700  $\text{cm}^{-1}$ . HRMS (ESI)  $m/z$ :  $[\text{M} + \text{H}]^+$  Calcd for  $\text{C}_{18}\text{H}_{28}\text{NO}_3$  306.2069; Found 306.2060.

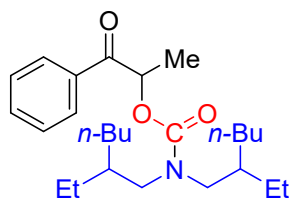

**3q**

**1-oxo-1-phenylpropan-2-yl bis(2-ethylhexyl)carbamate (compound 3q): Light yellow oil.**  $^1\text{H}$  NMR (400 MHz,  $\text{CDCl}_3$ ):  $\delta$  7.95 (d,  $J = 7.7$  Hz, 2H), 7.55 (t,  $J = 7.4$  Hz, 1H), 7.45 (t,  $J = 7.6$  Hz, 2H), 5.93 (q,  $J = 7.1$  Hz, 1H), 3.26-3.05 (m, 4H), 1.50 (s,  $J = 6.9$  Hz, 3H), 1.26-1.23 (m, 17H), 0.88-0.82 (m, 13H);  $^{13}\text{C}$  NMR (100 MHz,  $\text{CDCl}_3$ ):  $\delta$  197.9, 156.1, 135.0, 133.3, 128.7, 128.6, 71.8, 51.3, 50.3, 38.0, 37.3, 30.7, 30.5, 30.4, 28.9, 28.7, 23.8, 23.7, 23.2, 23.1, 17.1, 14.2, 10.8, 10.7. IR (KBr): 3065, 2960, 2862, 1698, 1598, 1468, 1228, 1158, 1100, 969, 767, 701  $\text{cm}^{-1}$ . HRMS (ESI)  $m/z$ :  $[\text{M} + \text{H}]^+$  Calcd for  $\text{C}_{26}\text{H}_{43}\text{NO}_3$  418.3321; Found 418.3311.

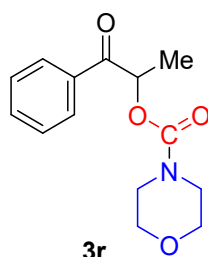

**3r**

**1-oxo-1-phenylpropan-2-yl morpholine-4-carboxylate (compound 3r): Yellow solid. mp: 103-104 °C.**  $^1\text{H}$  NMR (400 MHz,  $\text{CDCl}_3$ ):  $\delta$  7.95 (d,  $J = 6.3$  Hz, 2H), 7.58 (m, 1H), 7.47 (t,  $J = 6.4$  Hz, 2H), 5.95 (q,  $J = 6.9$  Hz, 1H), 3.68-3.51 (m, 8H), 1.52 (d,  $J = 6.9$  Hz, 3H);  $^{13}\text{C}$  NMR (100 MHz,  $\text{CDCl}_3$ ):  $\delta$  197.7, 154.6, 134.6, 133.5, 128.8, 128.5, 72.2, 66.6, 44.6, 44.1, 17.3. IR (KBr): 3065, 2965, 2869, 1691, 1595, 1421, 1246, 1109, 968, 856, 775, 708  $\text{cm}^{-1}$ . HRMS (ESI)  $m/z$ :  $[\text{M} + \text{H}]^+$  Calcd for  $\text{C}_{14}\text{H}_{18}\text{NO}_4$  264.1236 Found 264.1227.

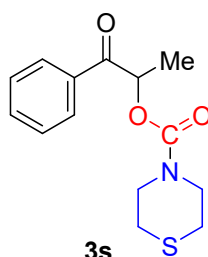

**3s**

**1-oxo-1-phenylpropan-2-yl thiomorpholine-4-carboxylate (compound 3s): Light yellow oil.**  $^1\text{H}$  NMR (400 MHz,  $\text{CDCl}_3$ ):  $\delta$  7.93 (d,  $J = 7.7$  Hz, 2H), 7.57 (m, 1H), 7.51 – 7.41 (m, 2H), 5.94 (q,  $J = 7.0$  Hz, 1H), 3.97 – 3.58 (m, 4H), 2.57 (br, 4H), 1.50 (d,  $J = 7.0$  Hz, 3H).  $^{13}\text{C}$  NMR (101 MHz,  $\text{CDCl}_3$ )  $\delta$  197.8, 154.4, 134.7, 133.5, 128.8, 128.5, 72.3, 46.9, 46.6, 27.3, 17.3. IR (KBr): 3062, 2905, 1690, 1596, 1436, 1291, 1232, 1112, 964, 768, 703  $\text{cm}^{-1}$ . HRMS (ESI)  $m/z$ :  $[\text{M} + \text{H}]^+$  Calcd for  $\text{C}_{14}\text{H}_{18}\text{NO}_3\text{S}$  280.1007; Found 280.0999.

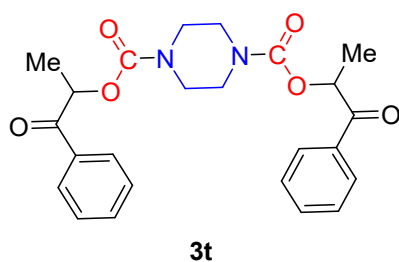

**bis(1-oxo-1-phenylpropan-2-yl) piperazine-1,4-dicarboxylate (compound 3t): Light yellow oil.**  $^1\text{H}$  NMR (400 MHz,  $\text{CDCl}_3$ ):  $\delta$  7.96 (d,  $J = 7.7$  Hz, 4H), 7.59 (t,  $J = 7.2$  Hz, 2H), 7.48 (t,  $J = 7.4$  Hz, 4H), 5.95 (q,  $J = 6.9$  Hz, 2H), 3.55 (br s, 8H), 1.53 (d,  $J = 6.9$  Hz, 6H);  $^{13}\text{C}$  NMR (100 MHz,  $\text{CDCl}_3$ ):  $\delta$  197.8, 154.6, 134.6, 133.6, 128.9, 128.6, 72.4, 44.1, 43.7, 17.4. IR (KBr): 3063, 2987, 2936, 1689, 1596, 1425, 1241, 1102, 1001, 968, 757, 697  $\text{cm}^{-1}$ . HRMS (ESI)  $m/z$ :  $[\text{M} + \text{H}]^+$  Calcd for  $\text{C}_{24}\text{H}_{27}\text{N}_2\text{O}_6$  439.1869; Found 439.1862.



#### IV. <sup>1</sup>H NMR, <sup>13</sup>C NMR Spectra of the Products

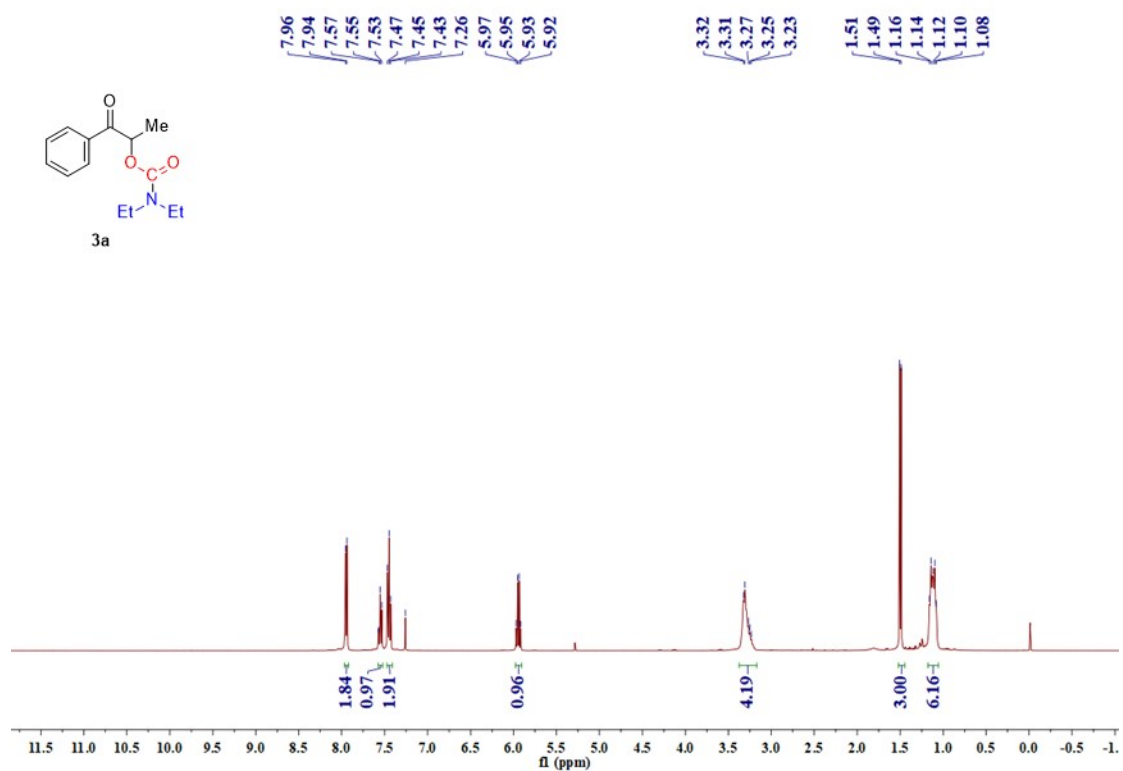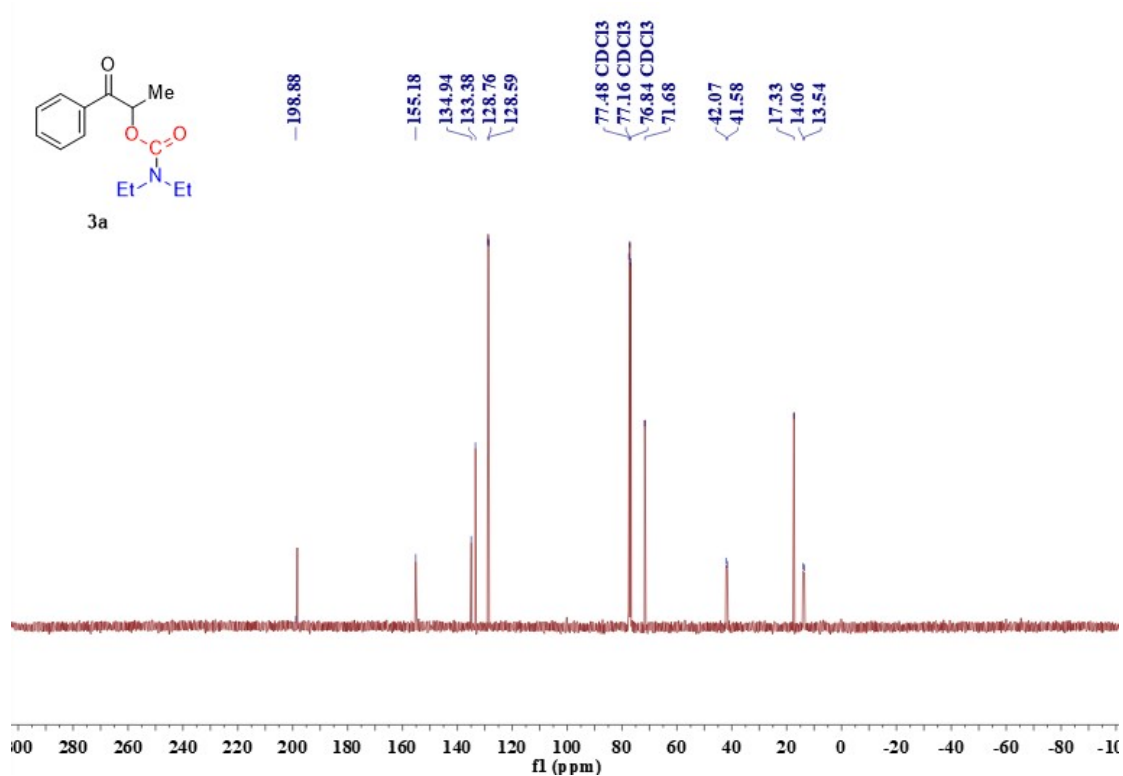

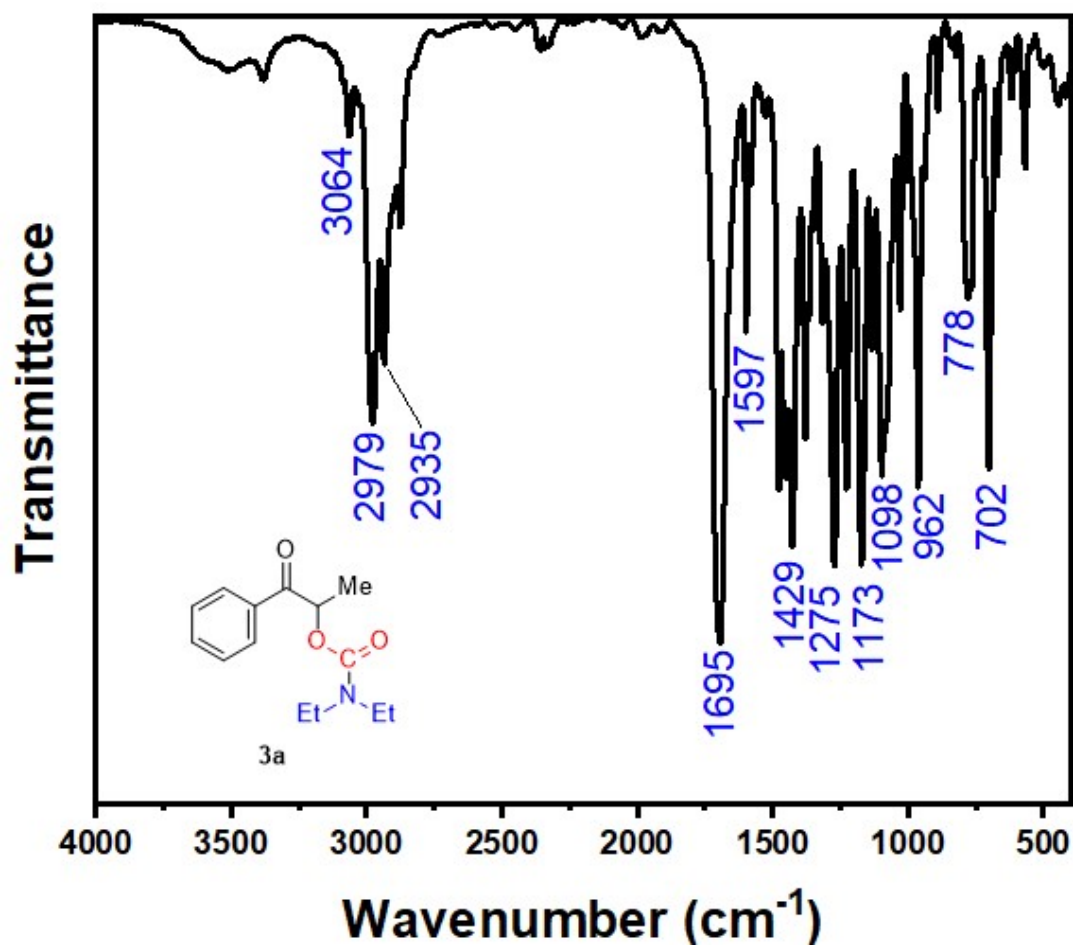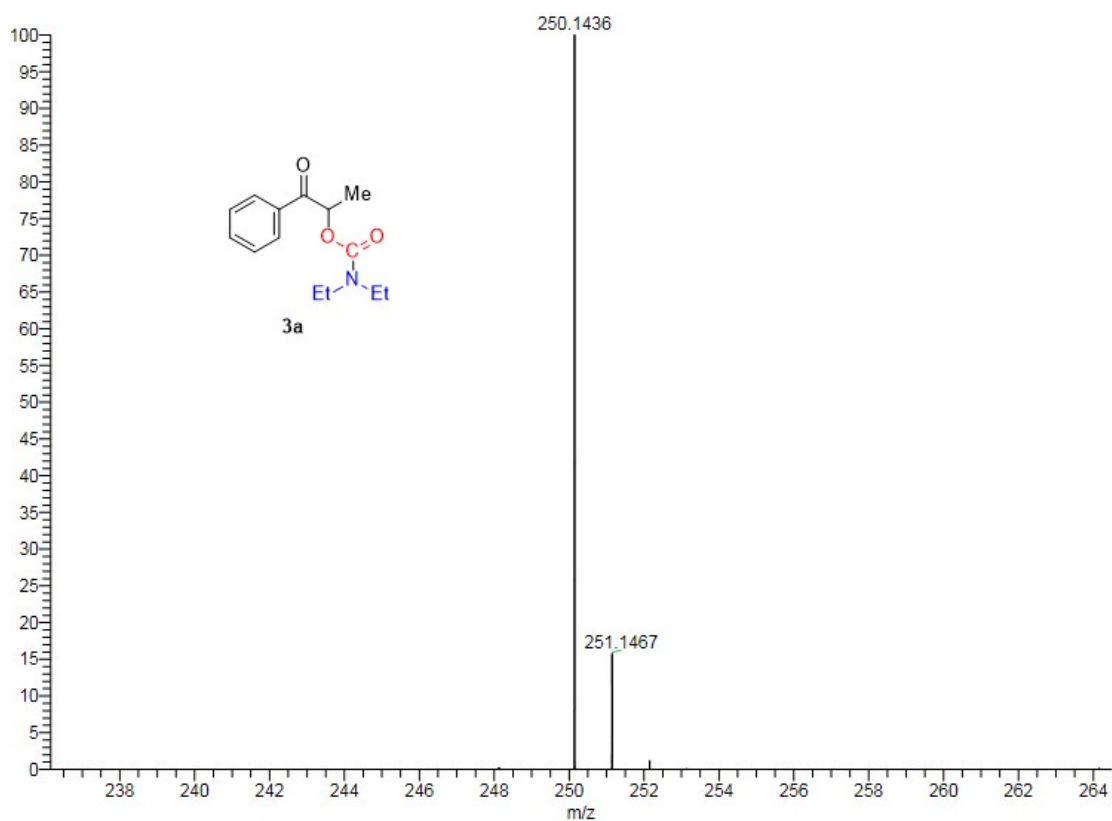

$^1\text{H}$  NMR,  $^{13}\text{C}$  NMR, FT-IR, and HRMS spectra of compound 3a

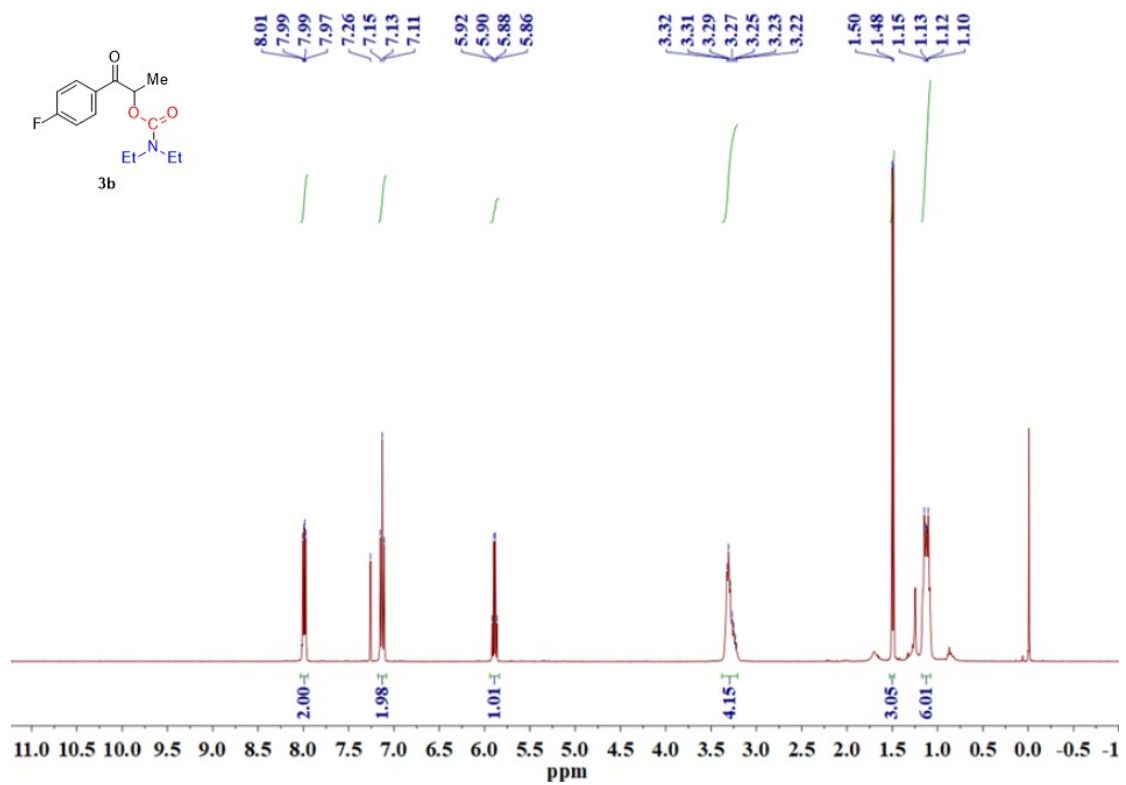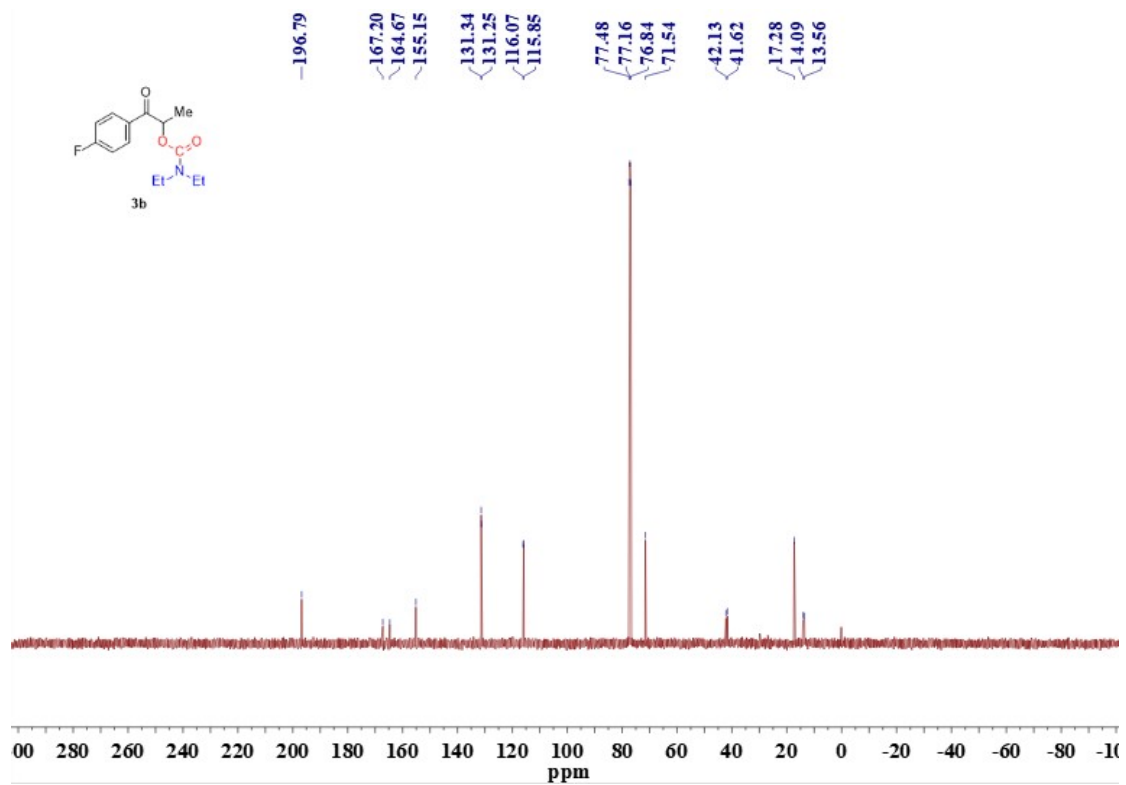

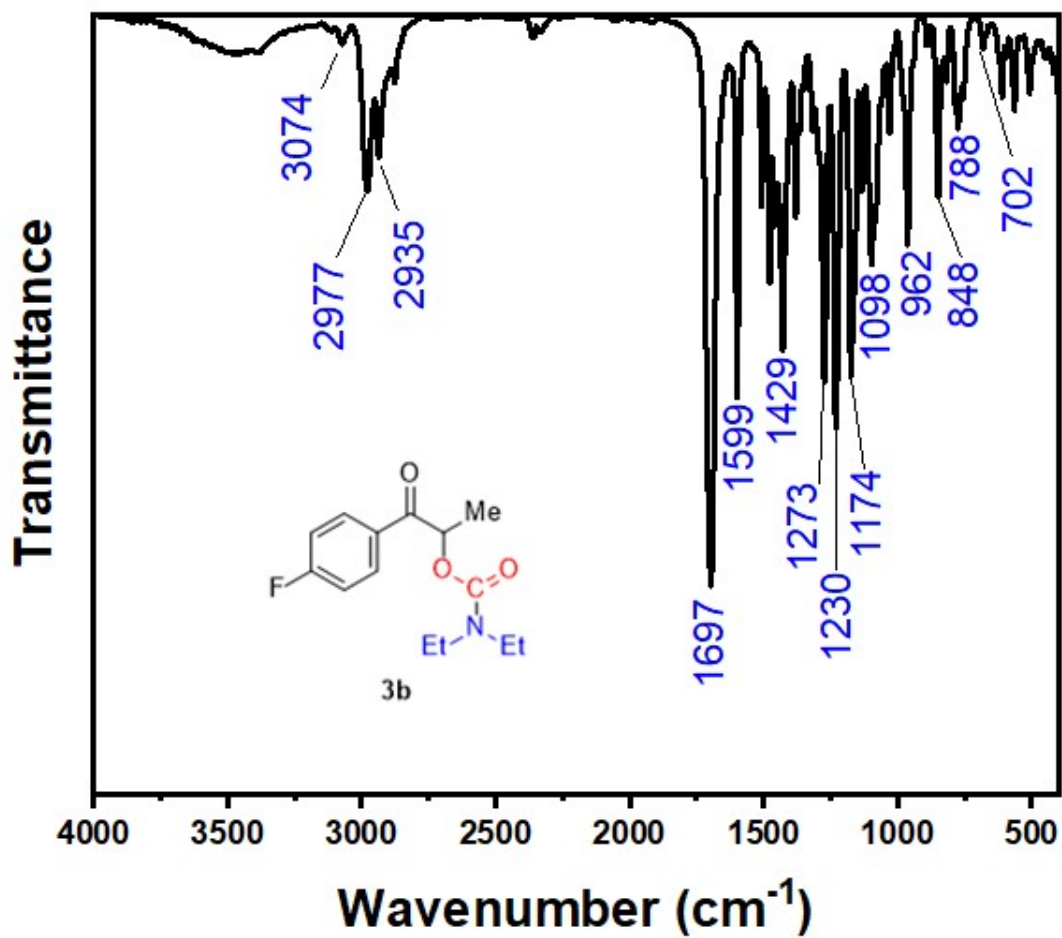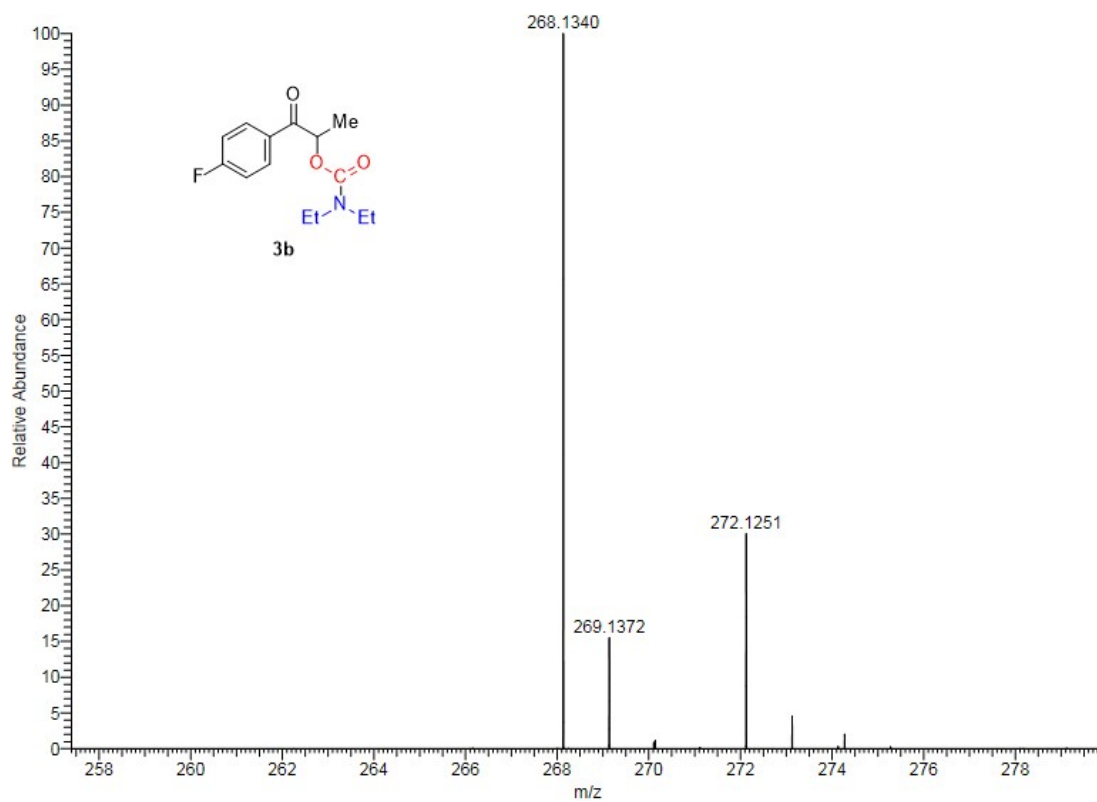

<sup>1</sup>H NMR, <sup>13</sup>C NMR, FT-IR, and HRMS spectra of compound 3b

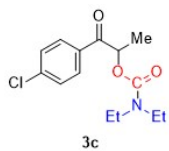

7.90  
 7.88  
 7.43  
 7.41  
 7.26  
 5.89  
 5.87  
 5.85  
 5.84  
 3.31  
 3.29  
 3.24  
 1.49  
 1.47  
 1.24  
 1.13  
 1.11  
 1.09

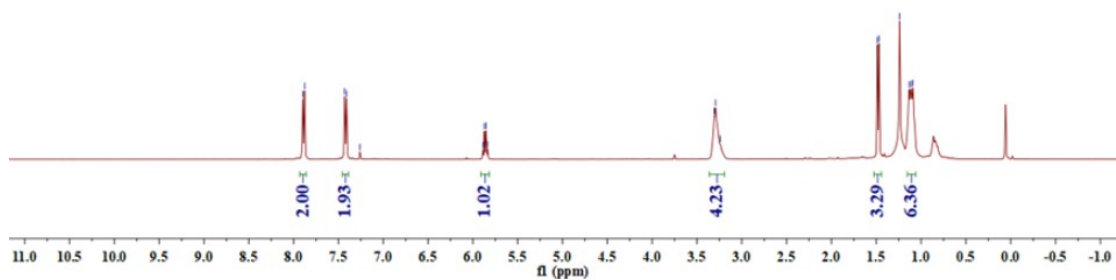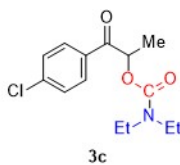

197.15  
 155.08  
 139.79  
 133.32  
 130.01  
 129.09  
 77.48  
 77.16  
 76.84  
 71.58  
 42.12  
 41.61  
 17.18  
 14.07  
 13.51

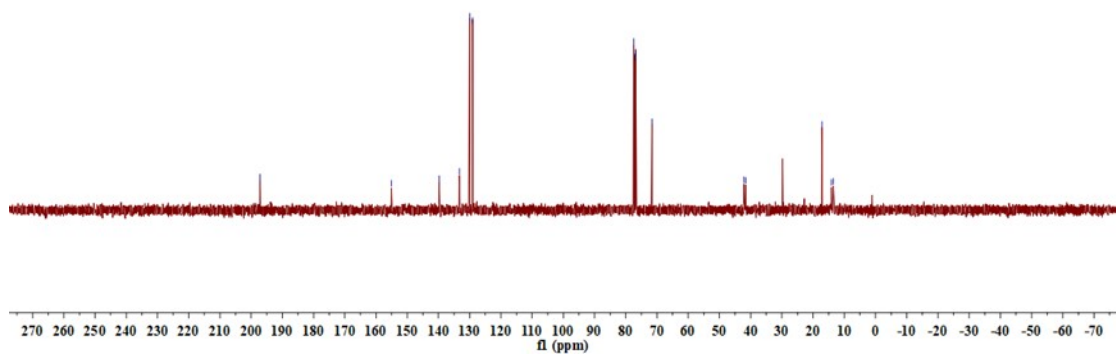

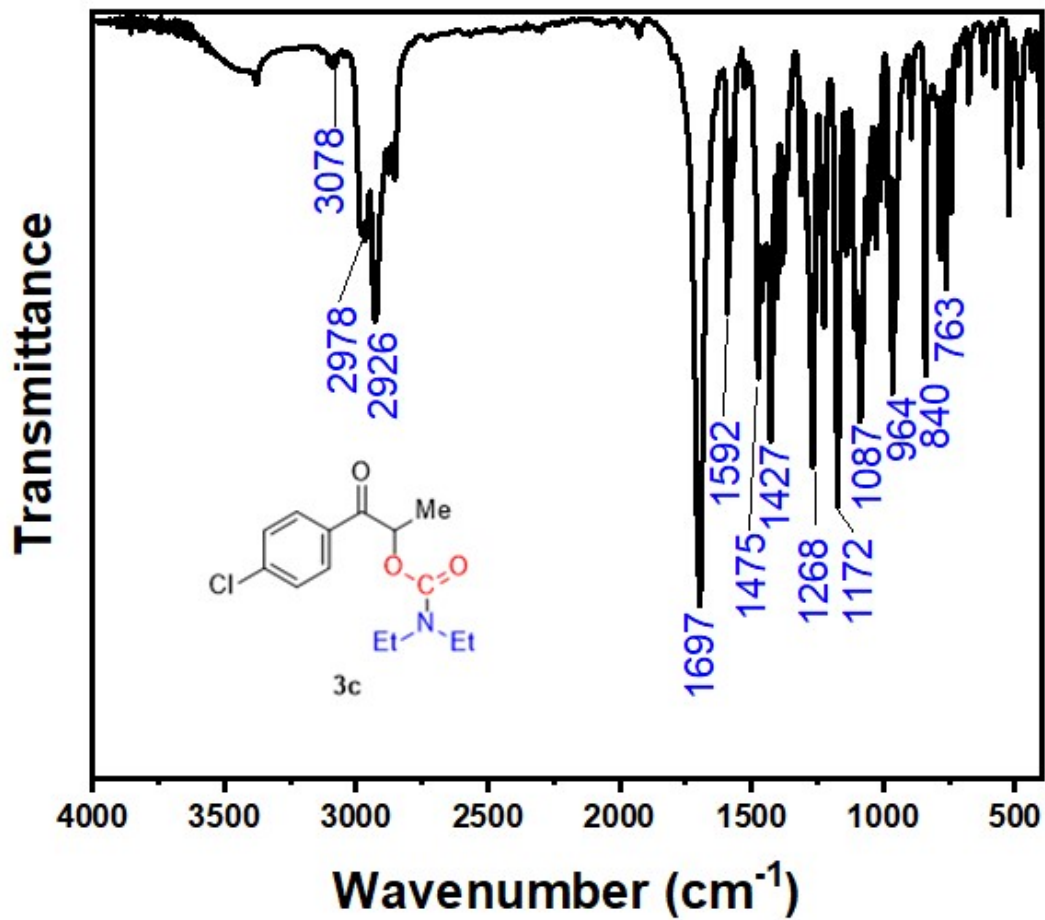

D:\LS\DATA\20210913\4\1-3

09/13/21 12:28:54

1-3 #18-23 RT: 0.08-0.11 AV: 6 SB: 46 0.65-0.85 NL: 3.70E9  
T: FTMS + p ESI Full ms [100.0000-1000.0000]

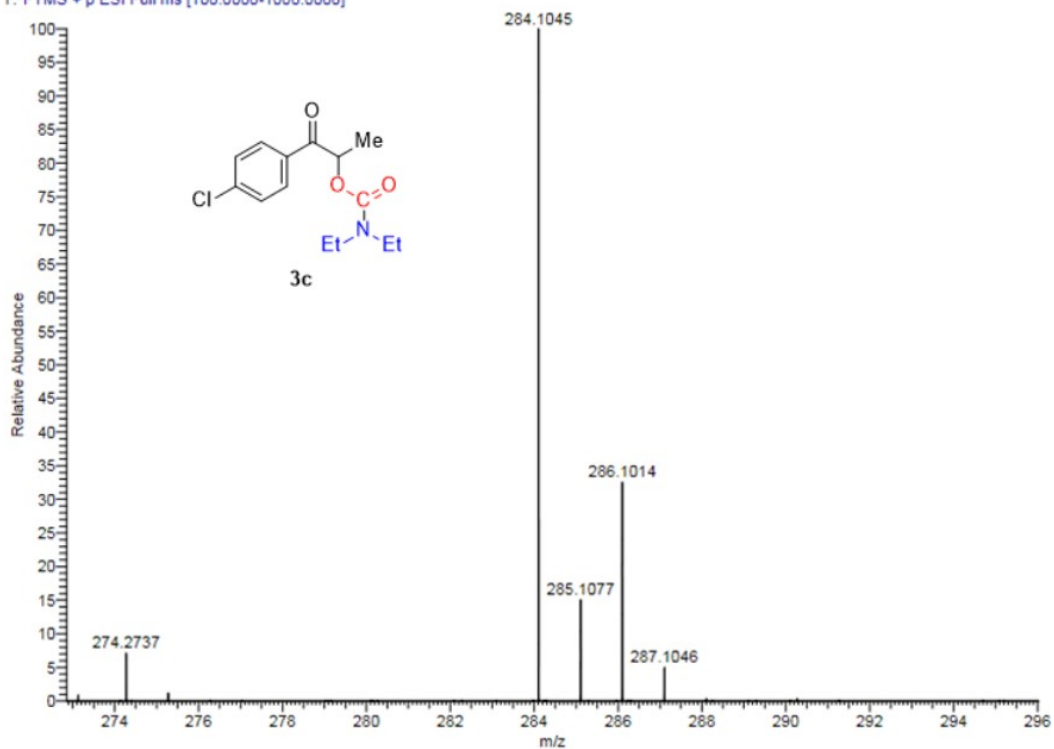

<sup>1</sup>H NMR, <sup>13</sup>C NMR, FT-IR, and HRMS spectra of compound 3c

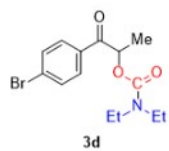

7.83  
7.80  
7.61  
7.59  
7.26

5.89  
5.87  
5.85  
5.83

3.32  
3.30  
3.28  
3.27  
3.25  
3.23  
3.21

1.49  
1.48  
1.14  
1.12  
1.10

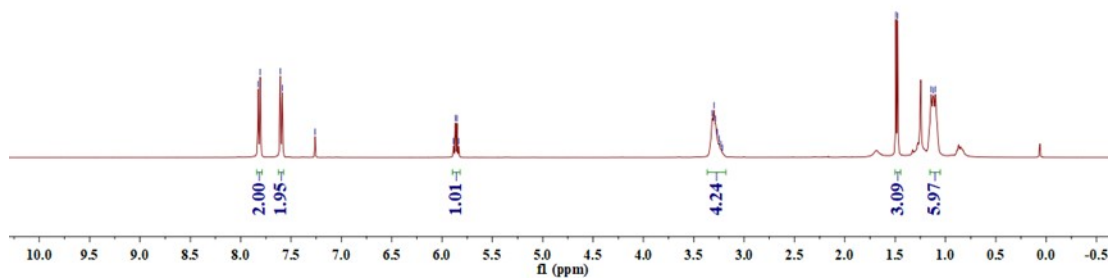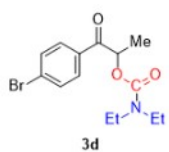

197.43

155.11

133.73

132.11

130.13

128.55

77.48

77.16

76.84

71.59

42.12

41.61

17.20

14.10

13.54

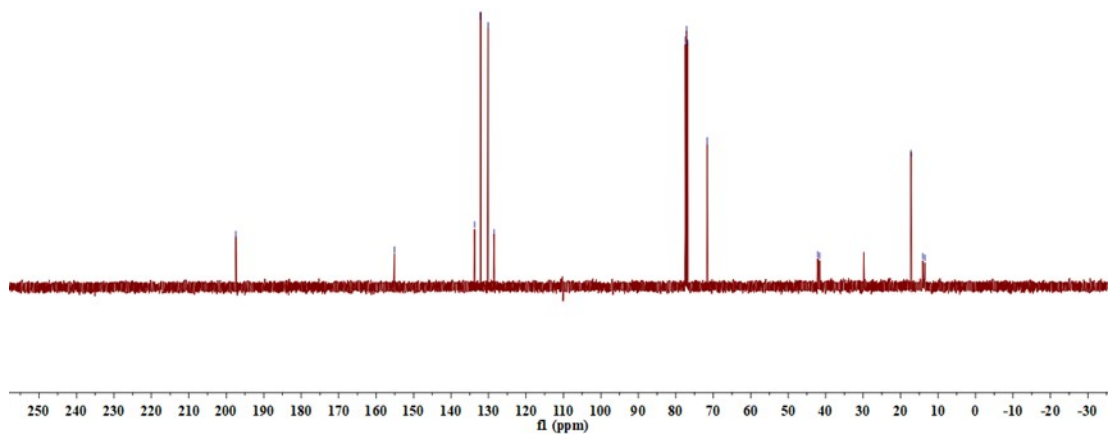

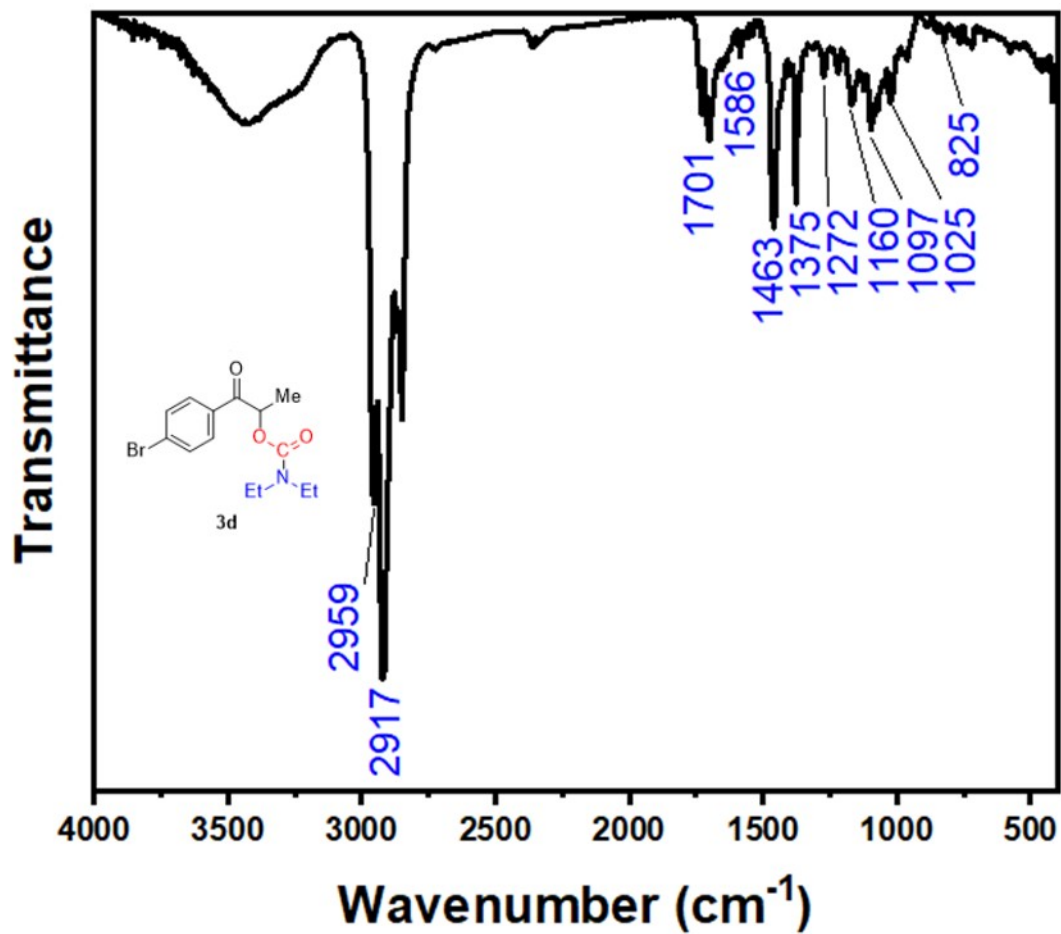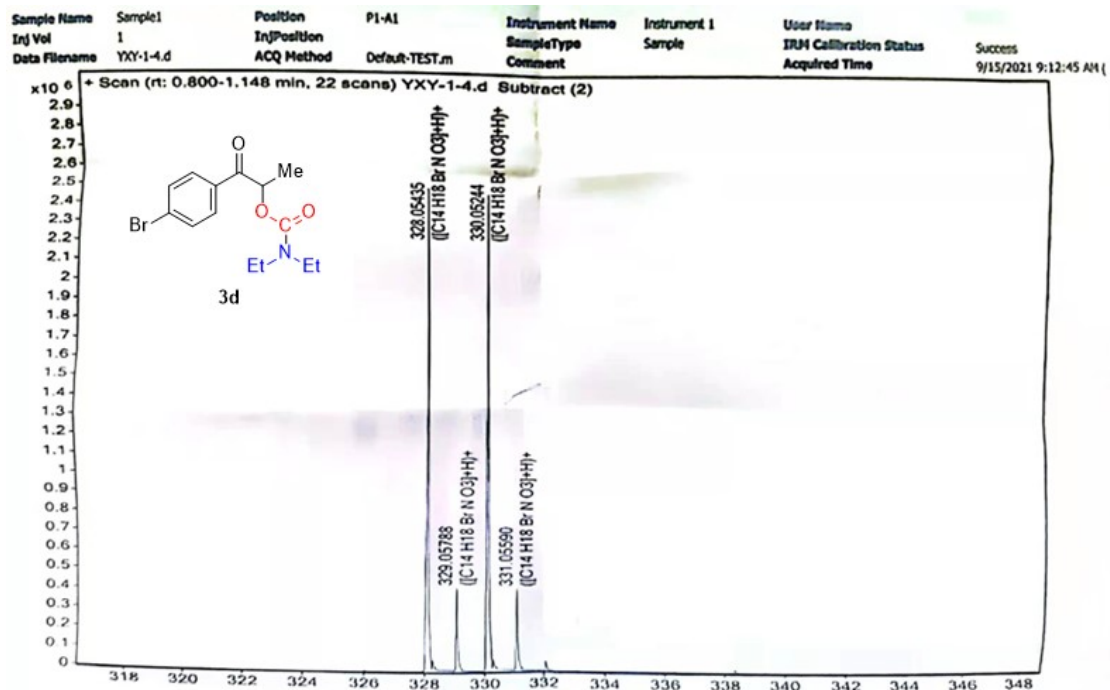

<sup>1</sup>H NMR, <sup>13</sup>C NMR, FT-IR, and HRMS spectra of compound 3d



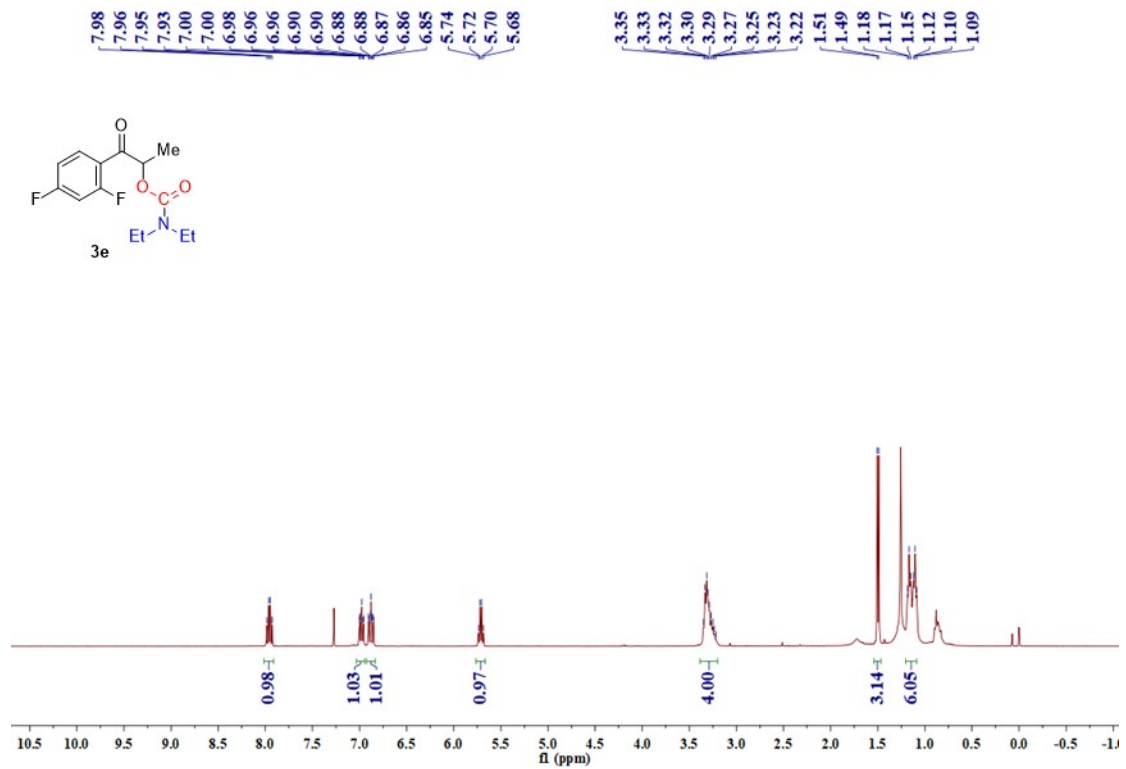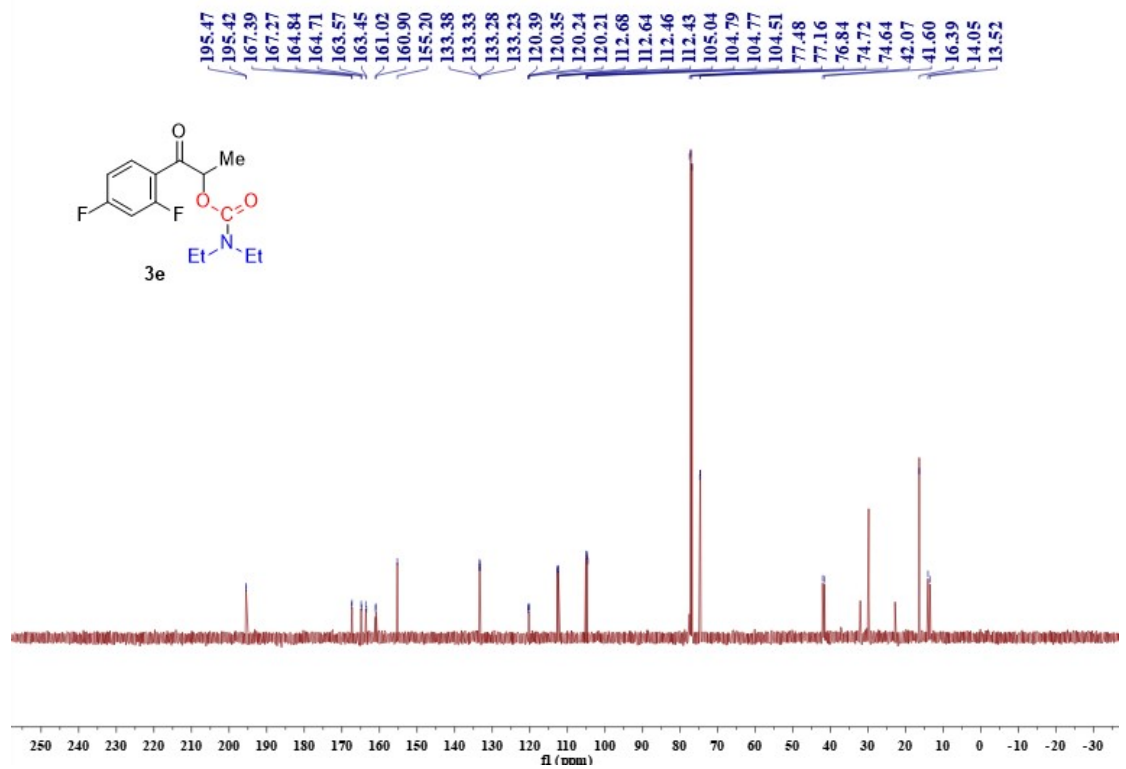

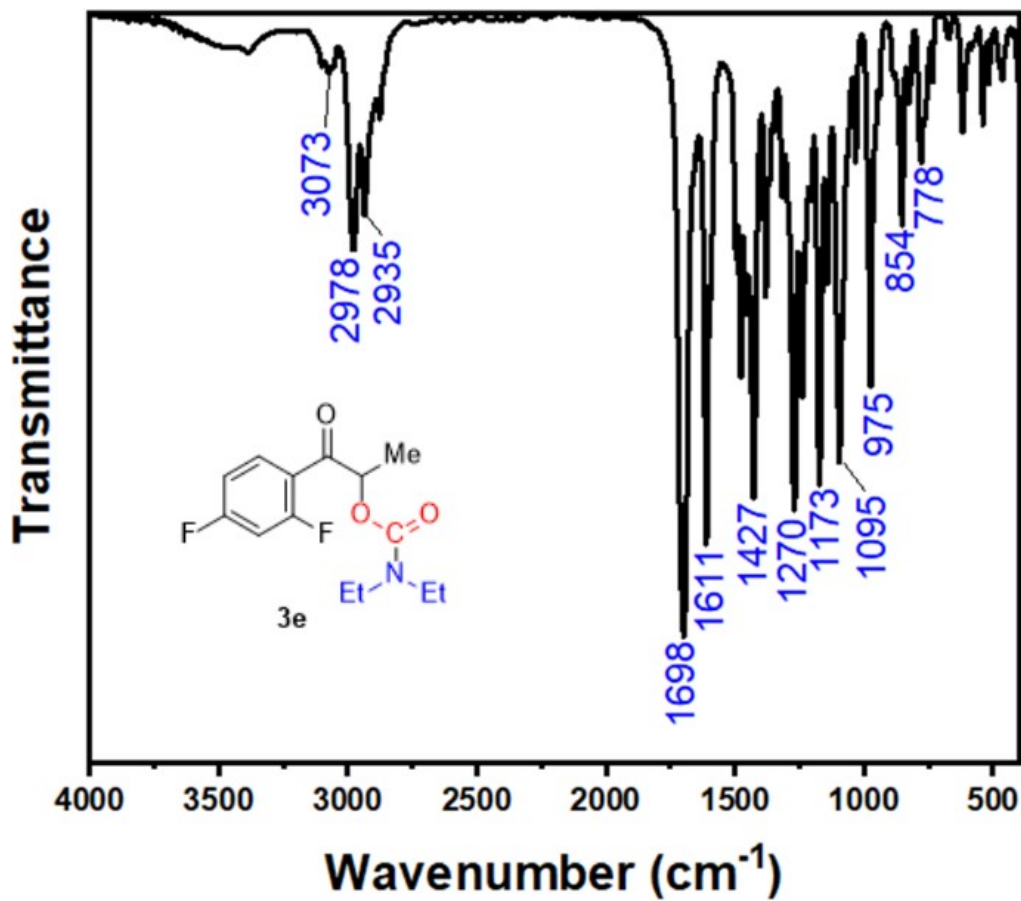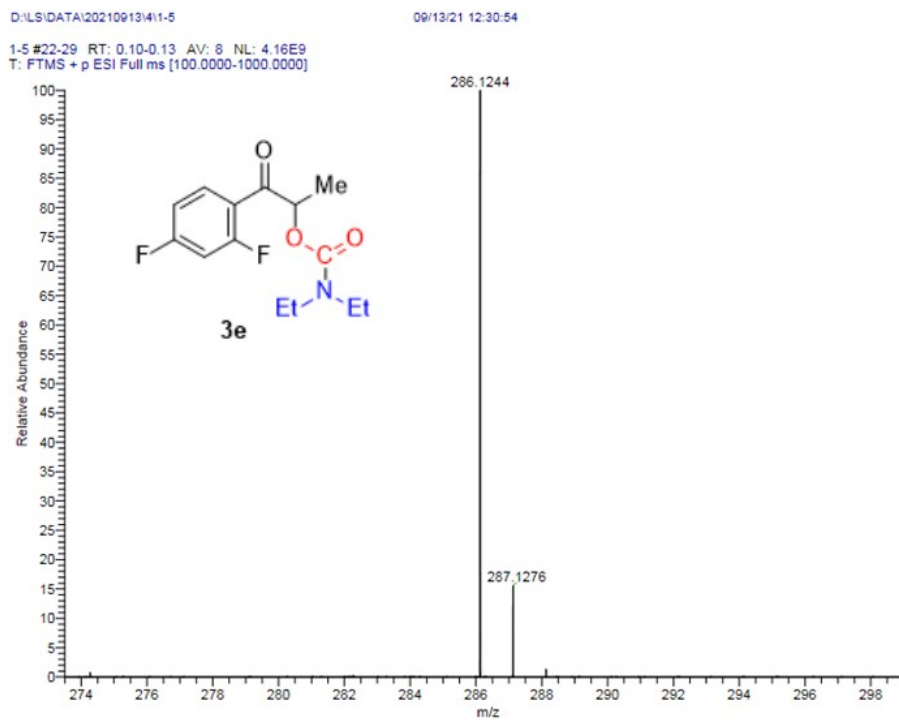

<sup>1</sup>H NMR, <sup>13</sup>C NMR, FT-IR, and HRMS spectra of compound 3e

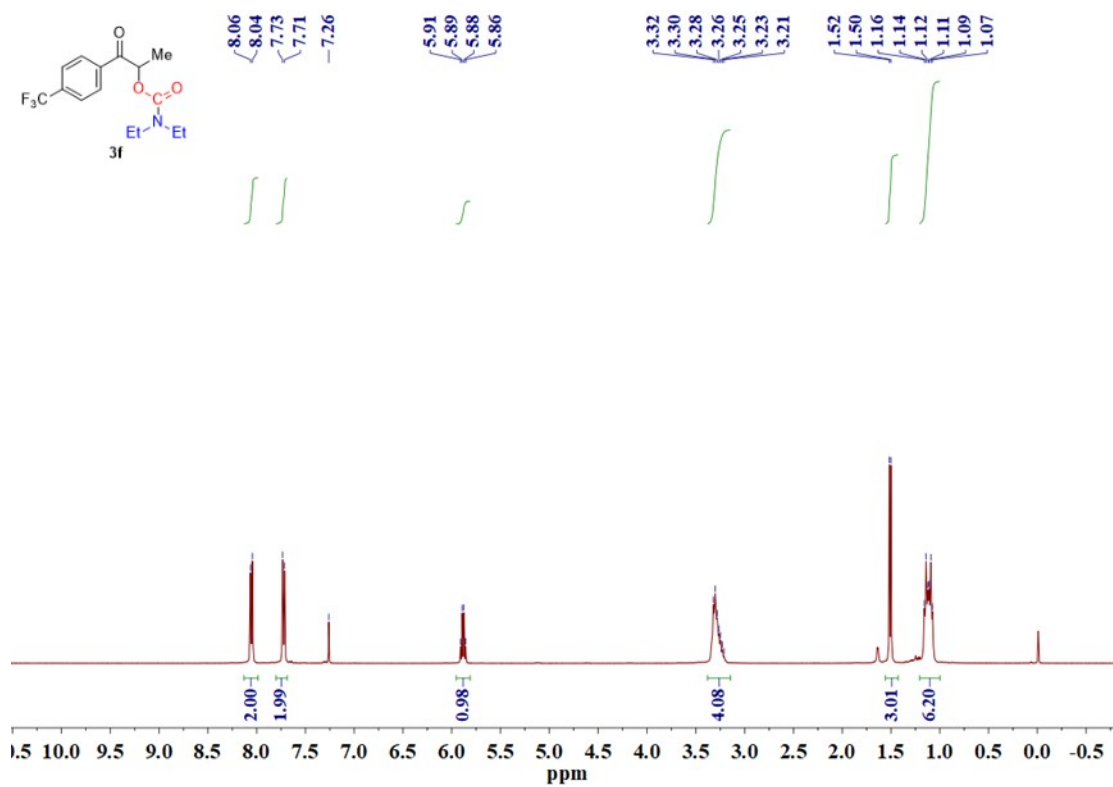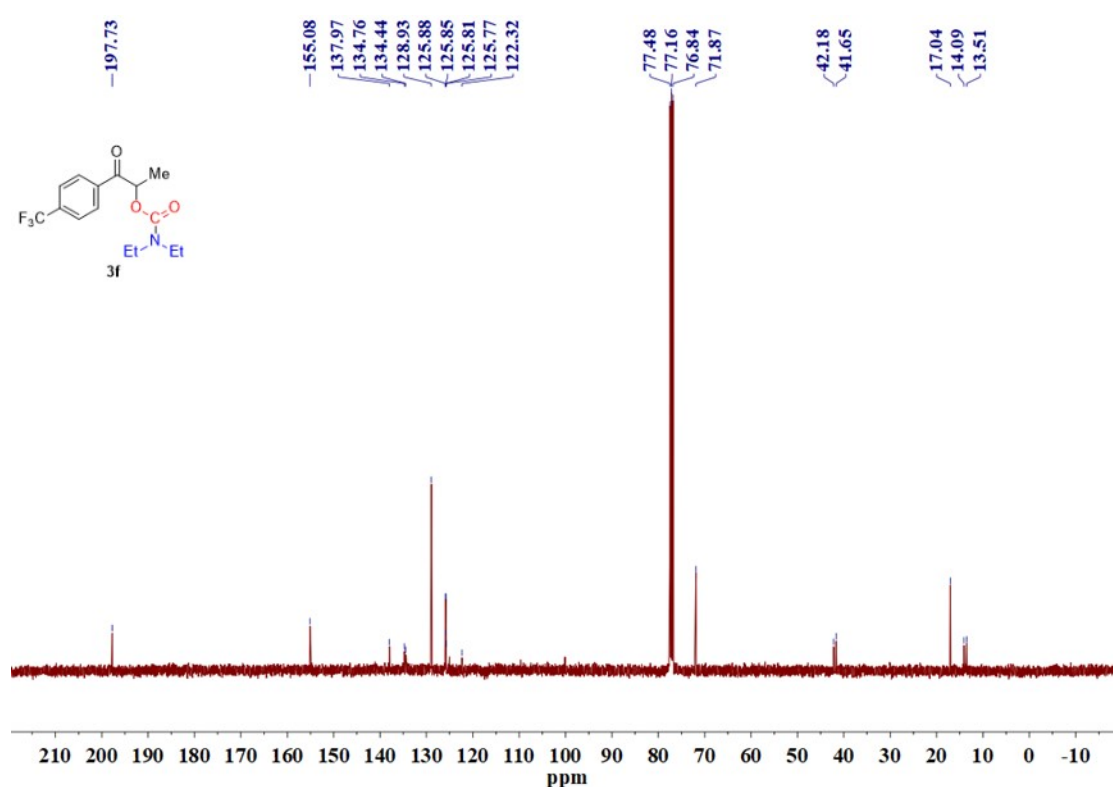

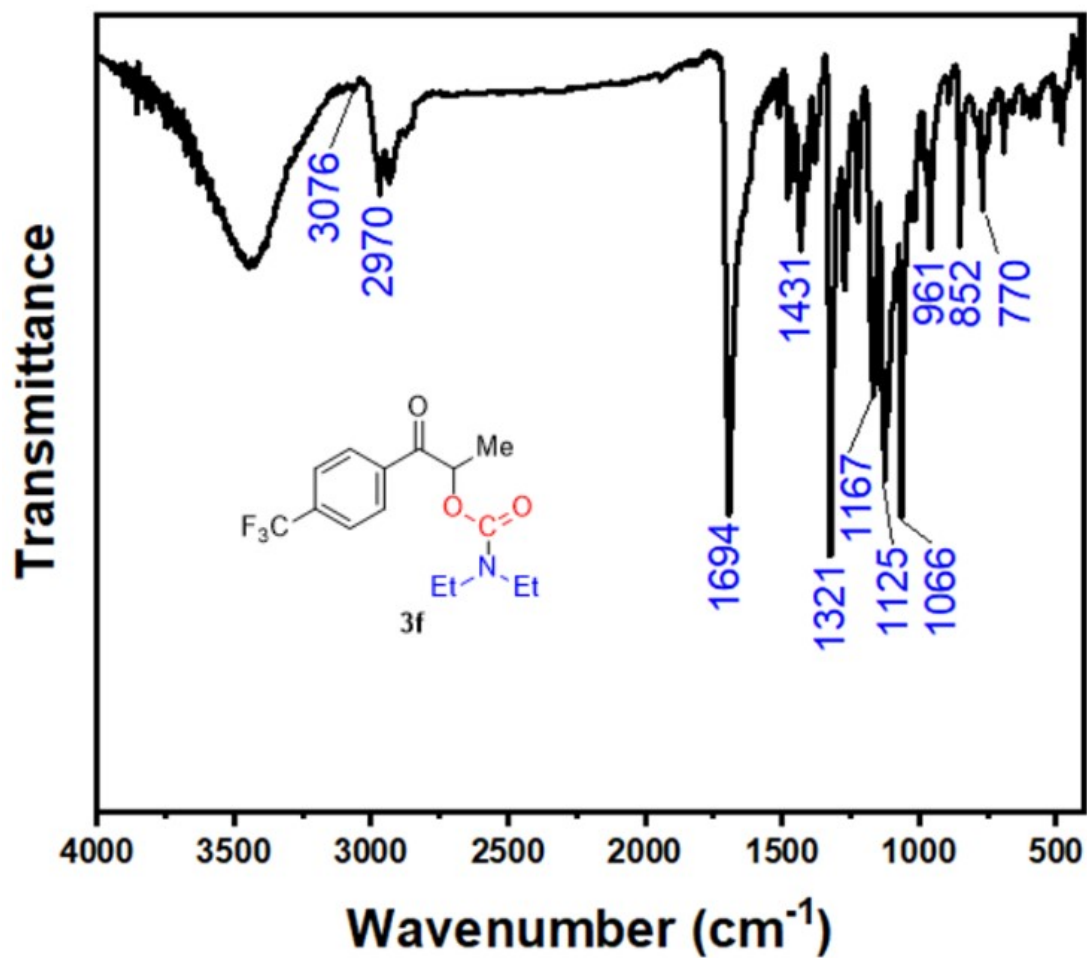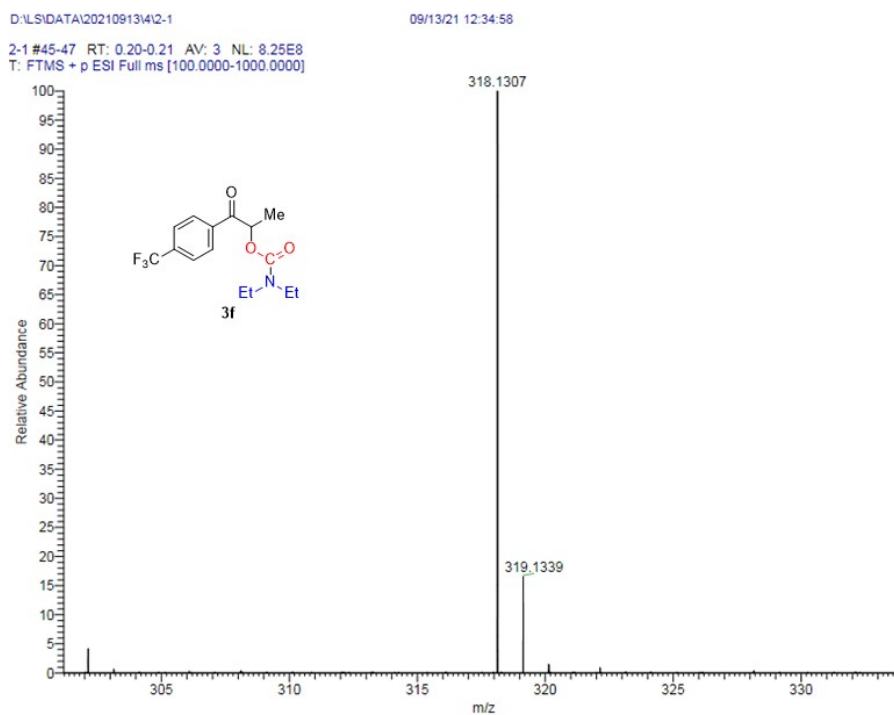

<sup>1</sup>H NMR, <sup>13</sup>C NMR, FT-IR, and HRMS spectra of compound 3f

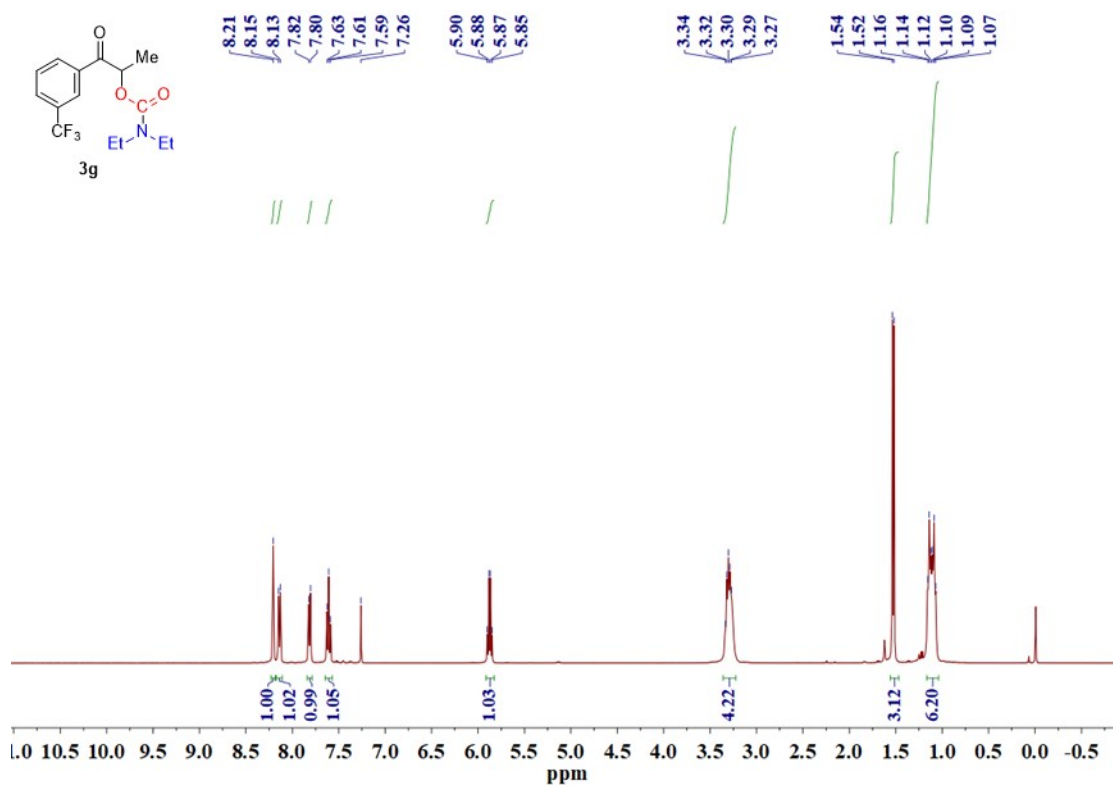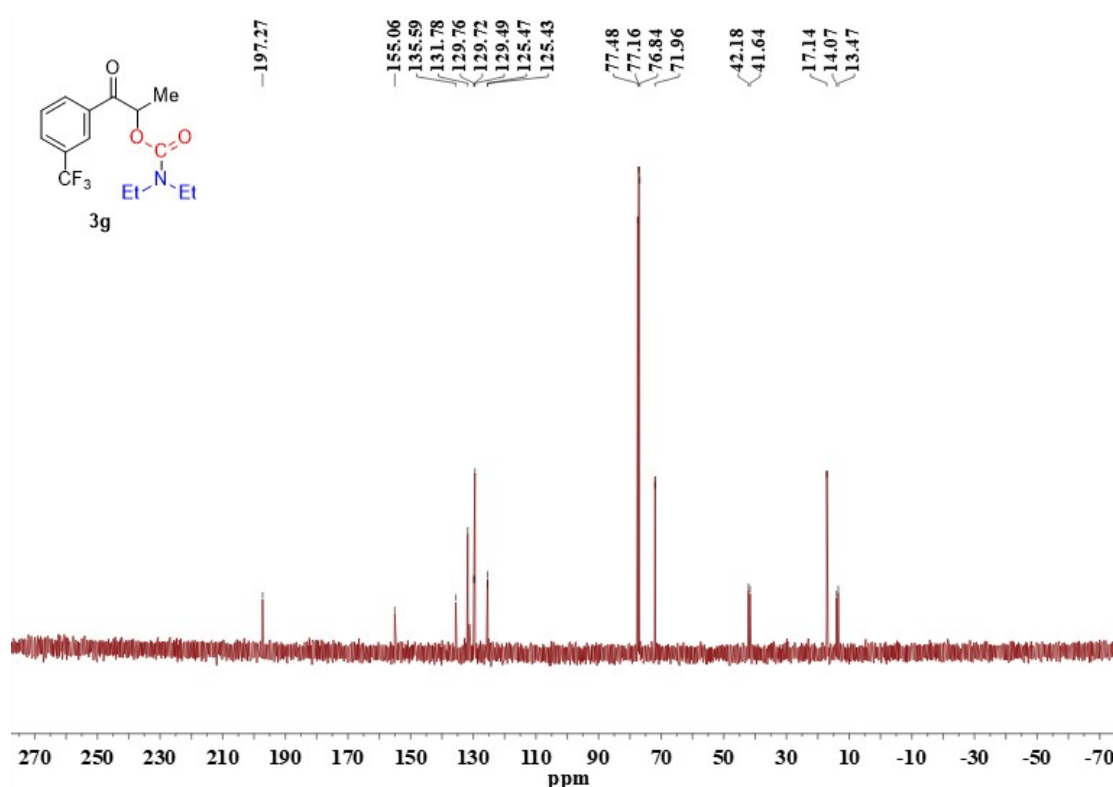

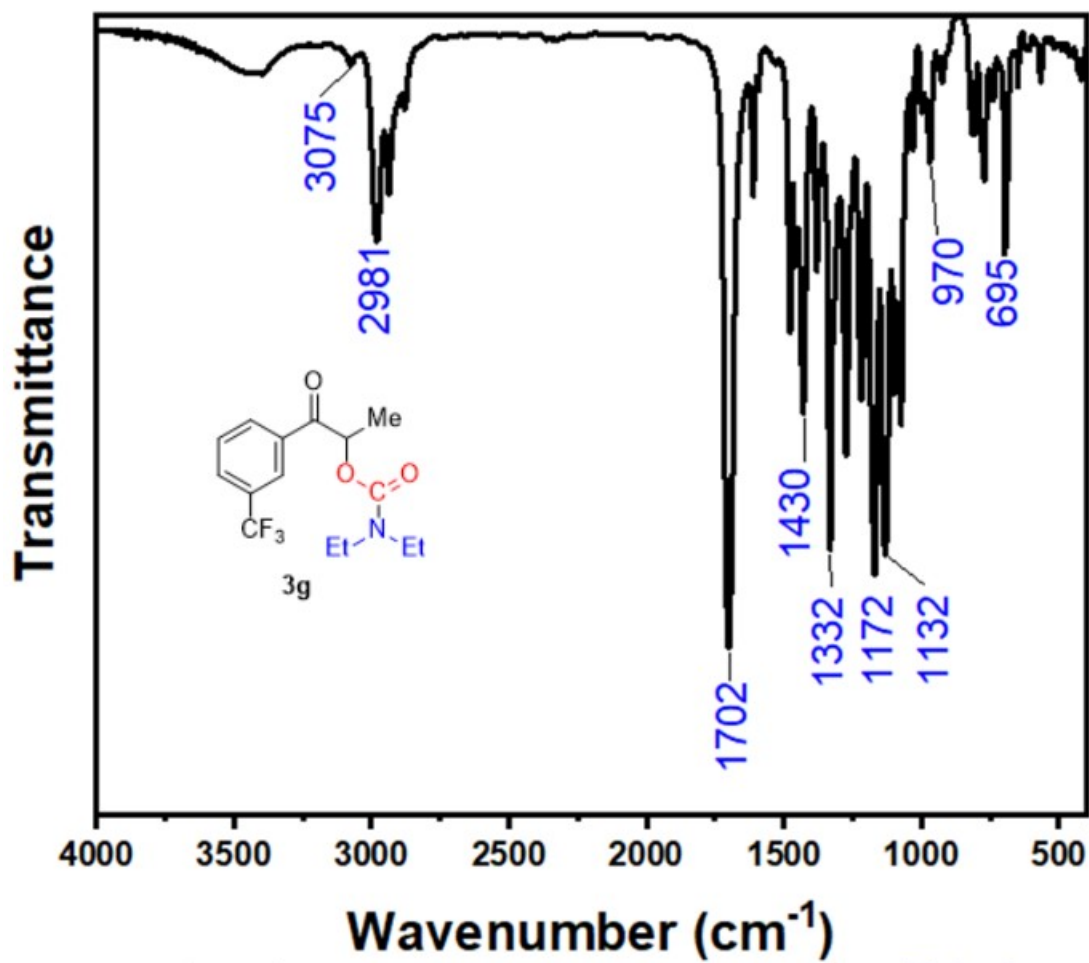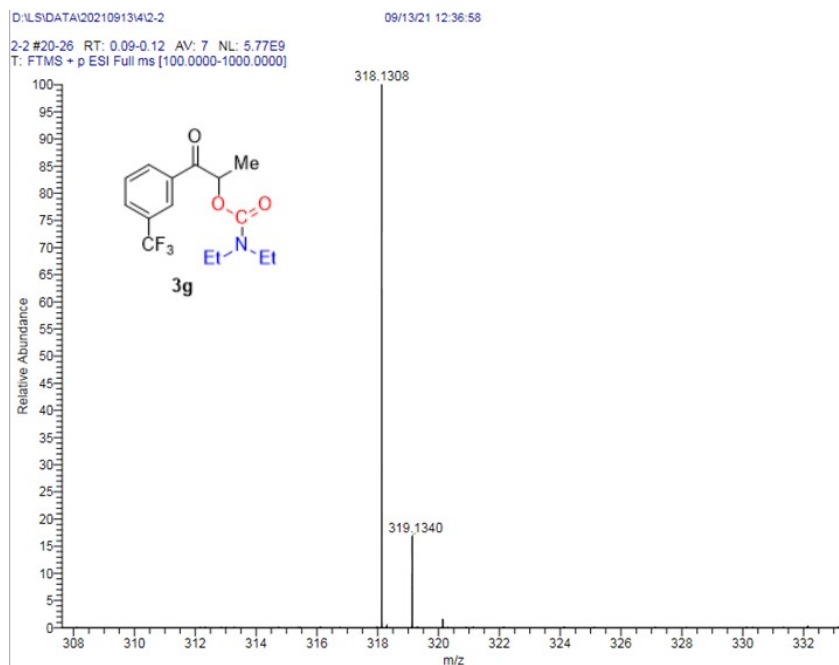

<sup>1</sup>H NMR, <sup>13</sup>C NMR, FT-IR, and HRMS spectra of compound 3g

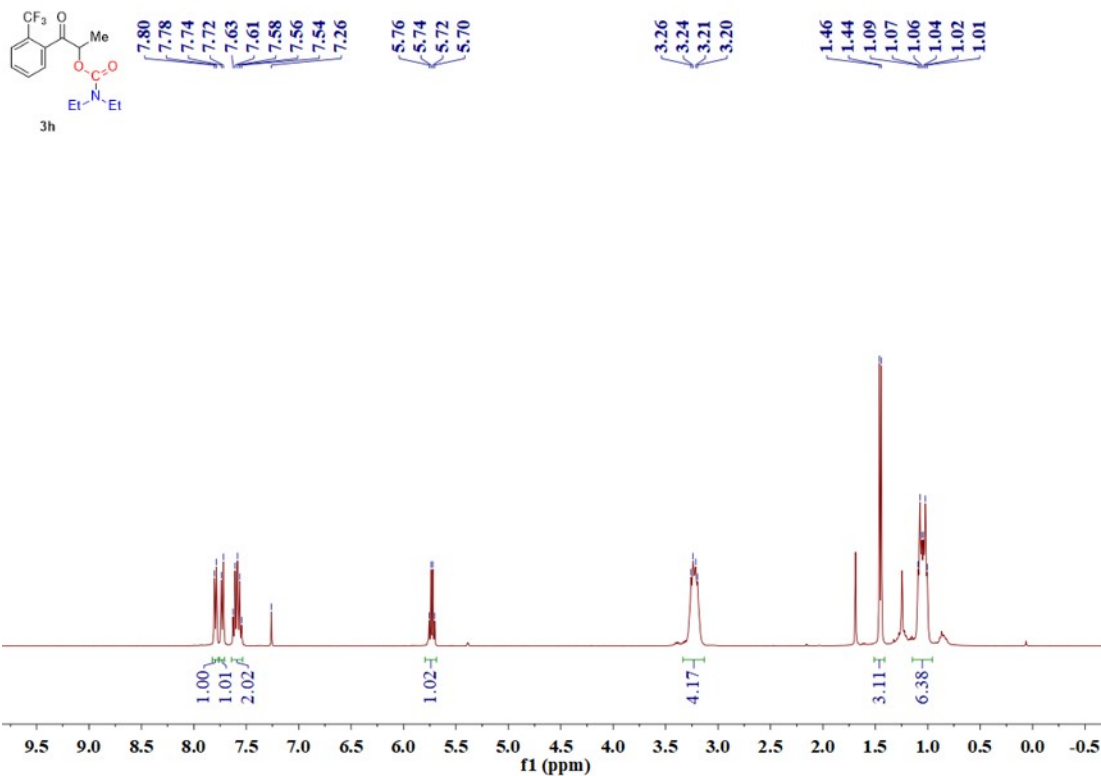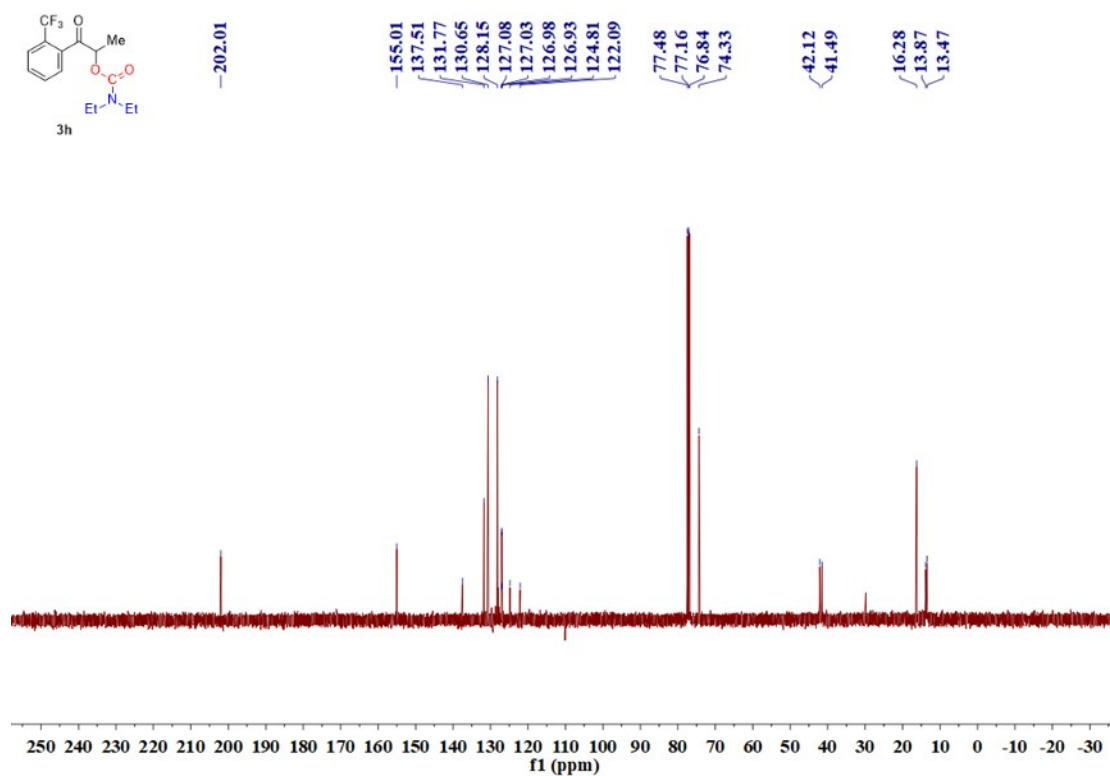

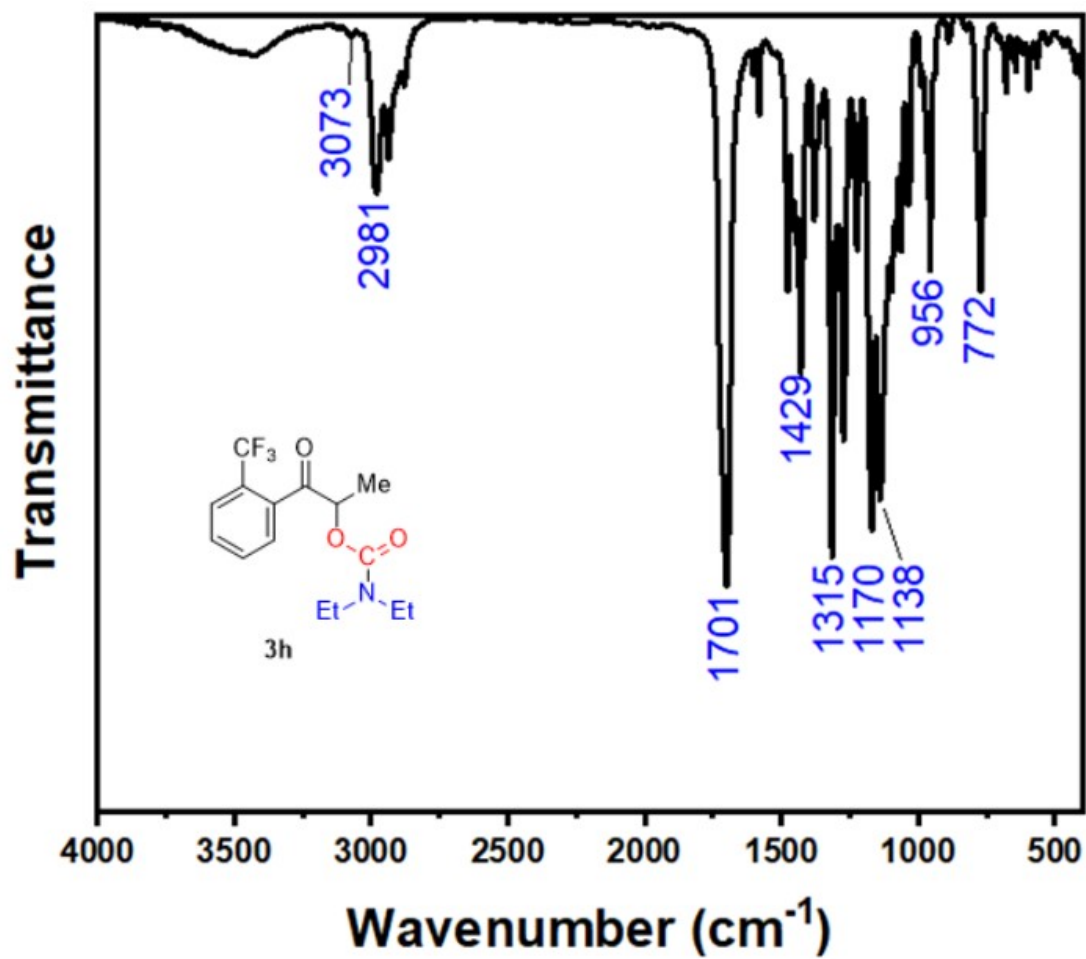

D:\LSIDATA\20210913\412-3

09/13/21 12:39:02

2-3 #44-46 RT: 0.20-0.21 AV: 3 SB: 50 0.73-0.94 NL: 1.36E9  
T: FTMS + p ESI Full ms [100.0000-1000.0000]

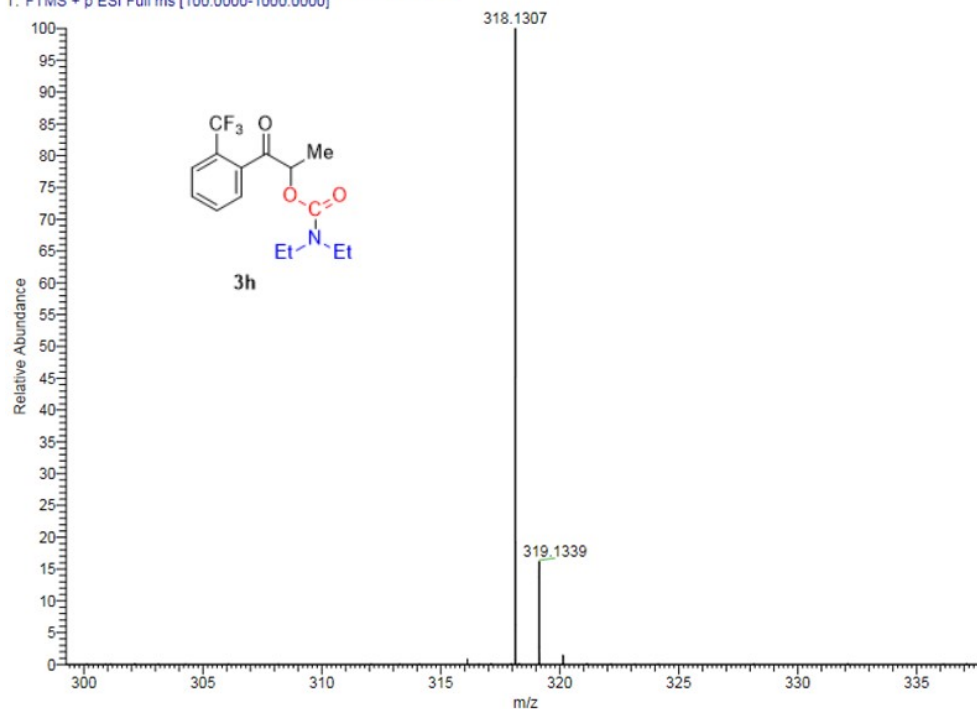

<sup>1</sup>H NMR, <sup>13</sup>C NMR, FT-IR, and HRMS spectra of compound 3h



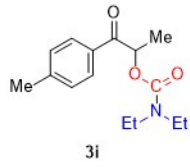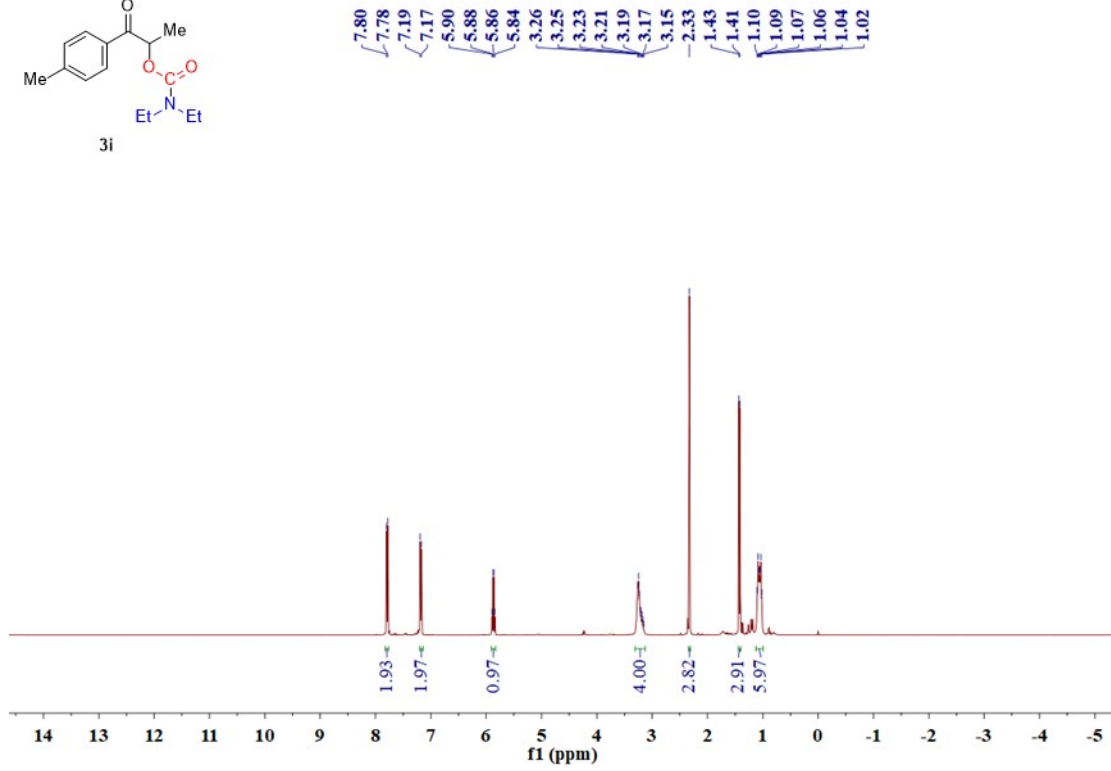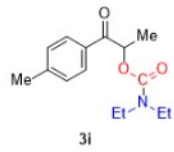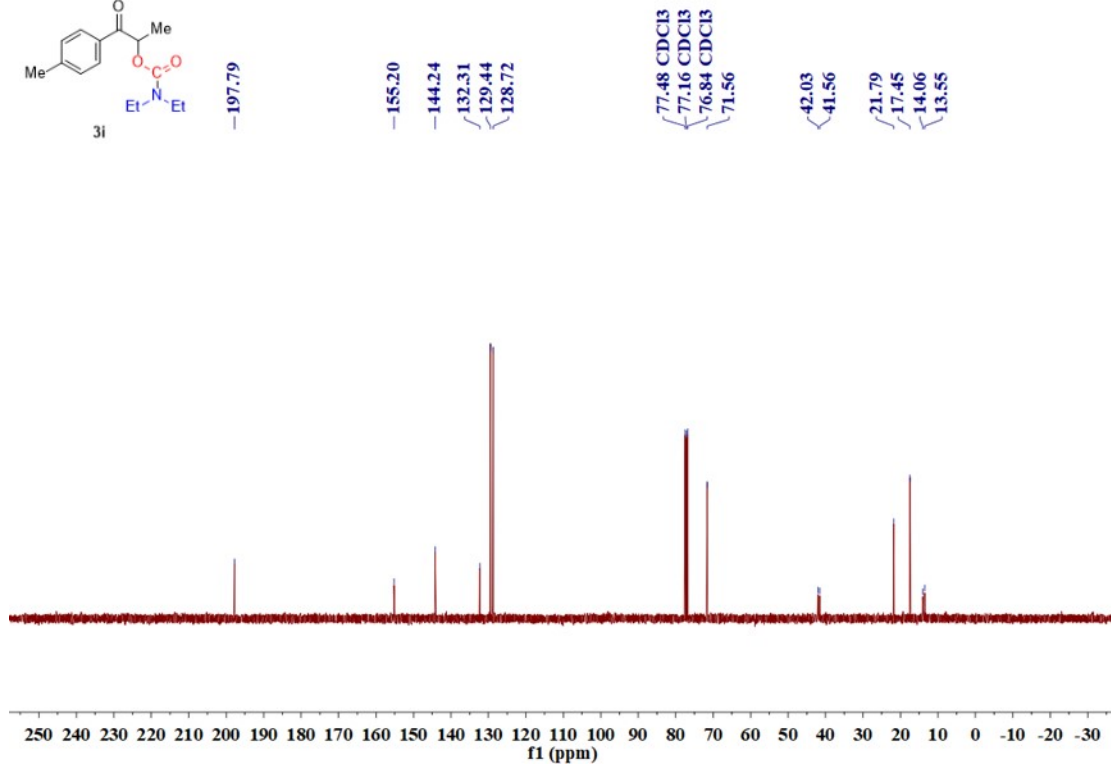

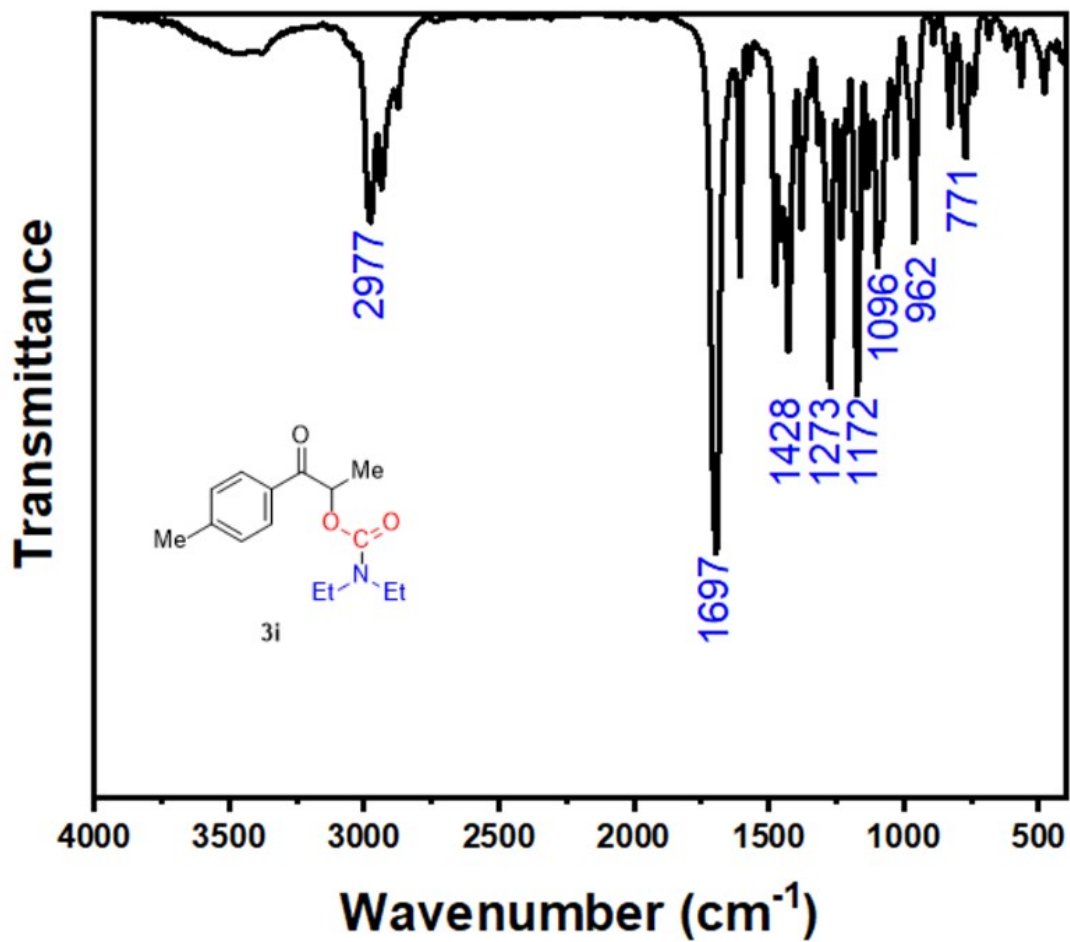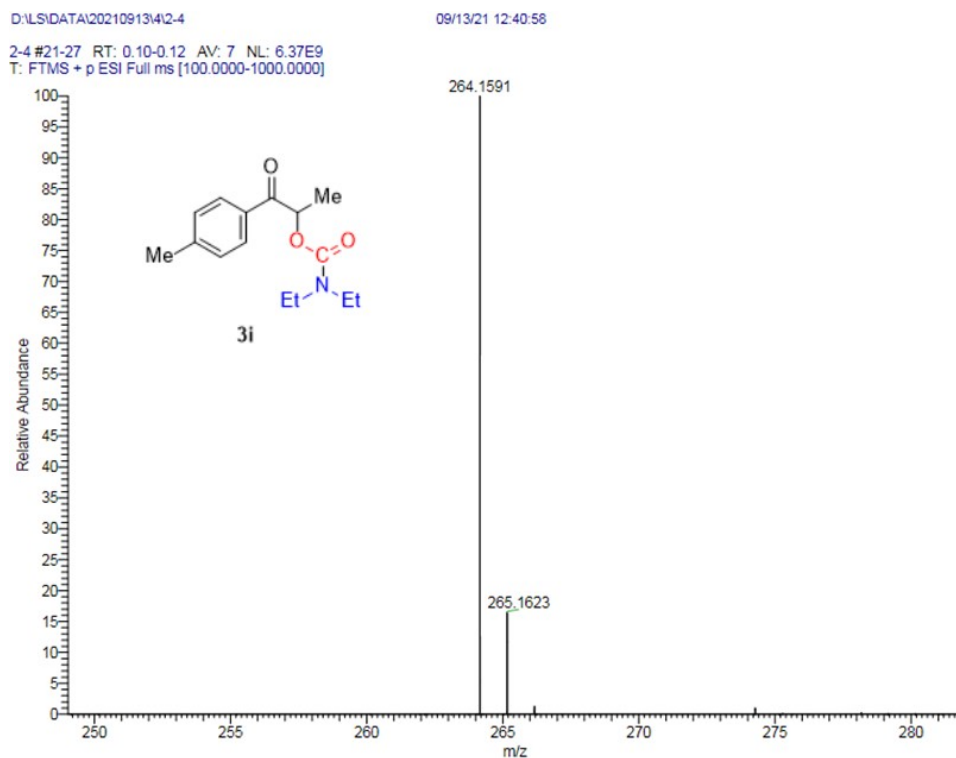

<sup>1</sup>H NMR, <sup>13</sup>C NMR, FT-IR, and HRMS spectra of compound 3i

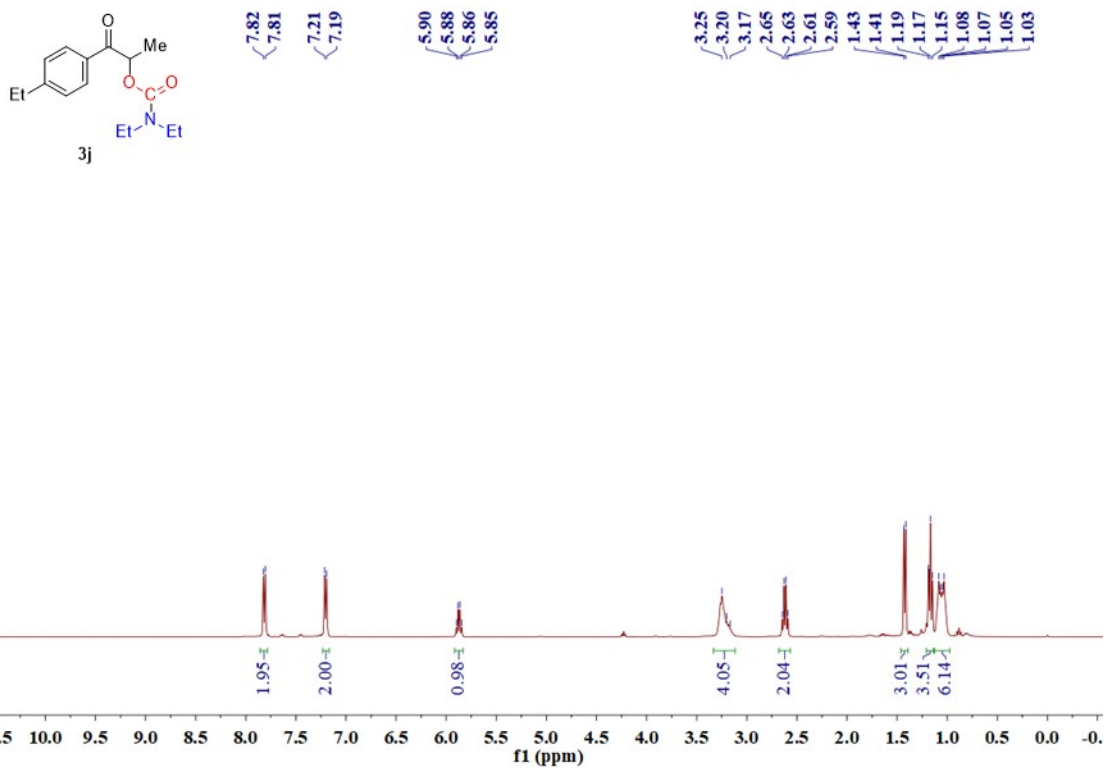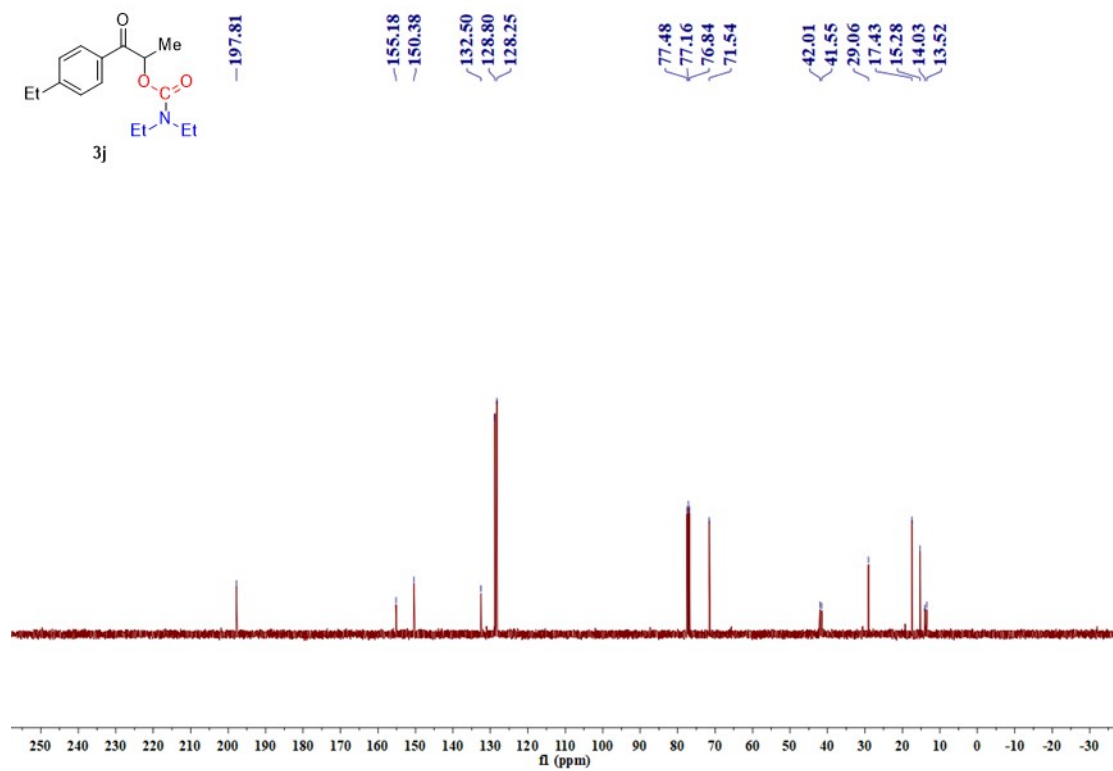

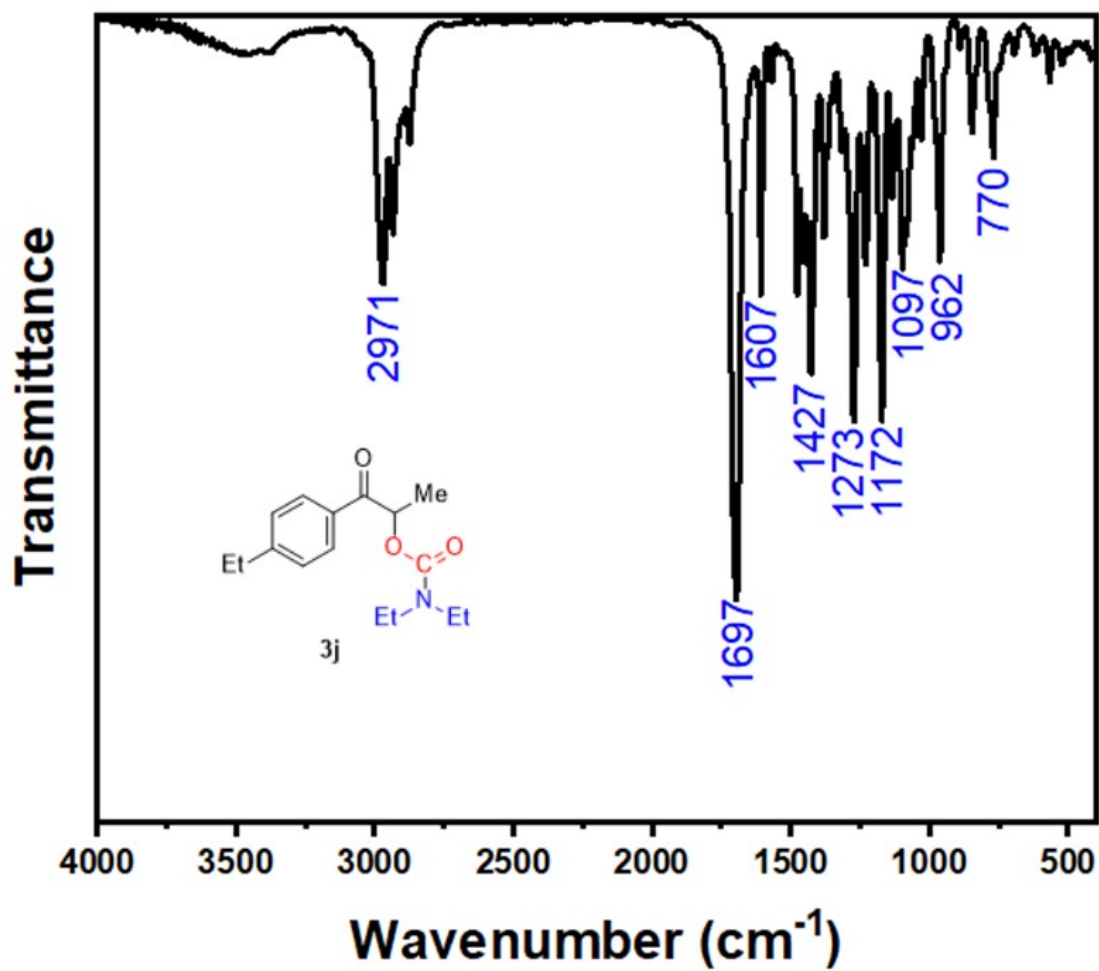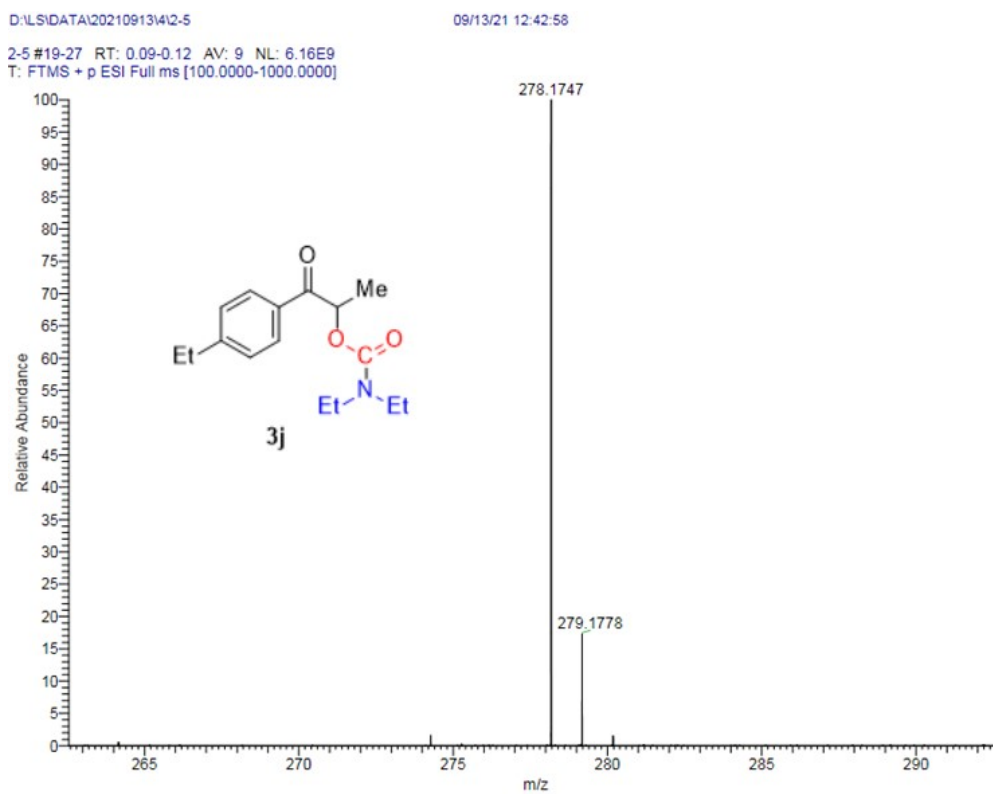

$^1\text{H}$  NMR,  $^{13}\text{C}$  NMR, FT-IR, and HRMS spectra of compound 3j

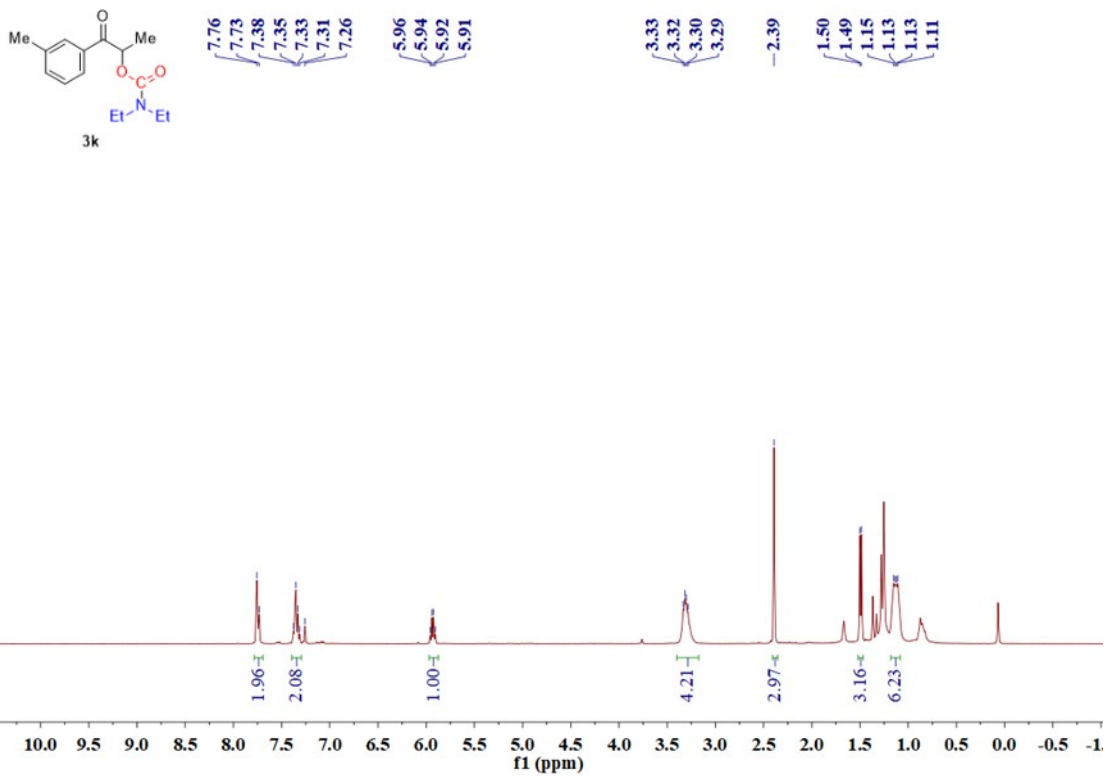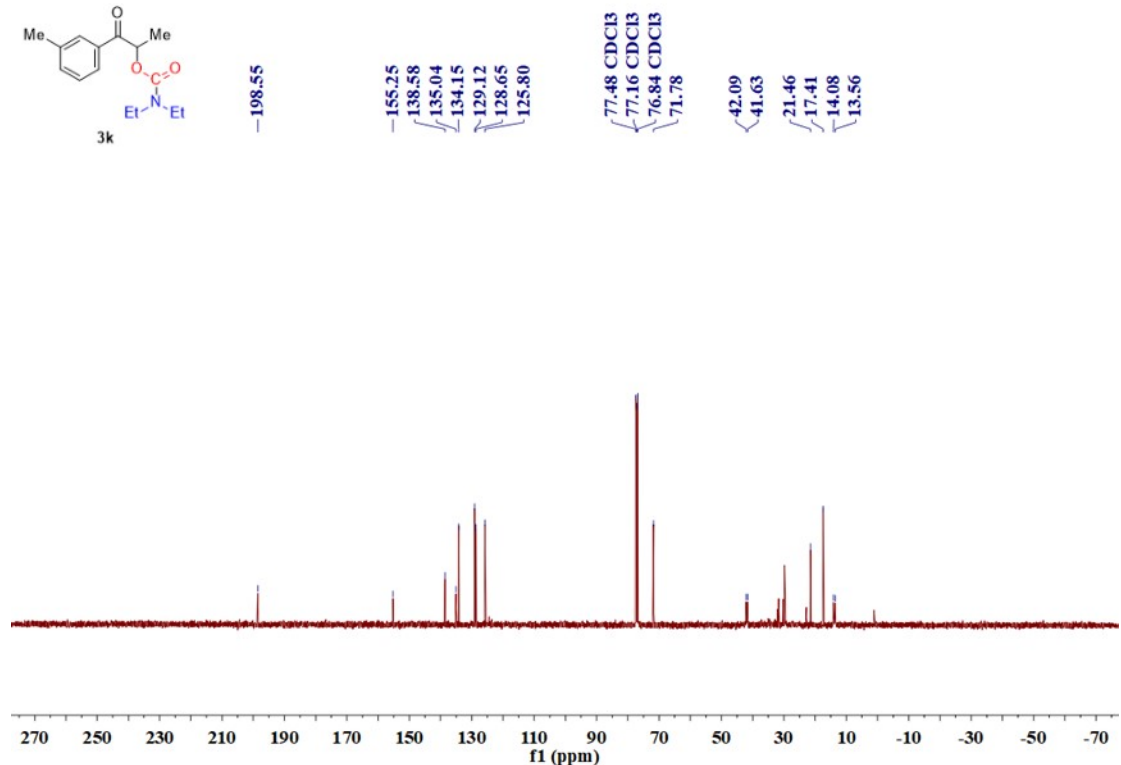

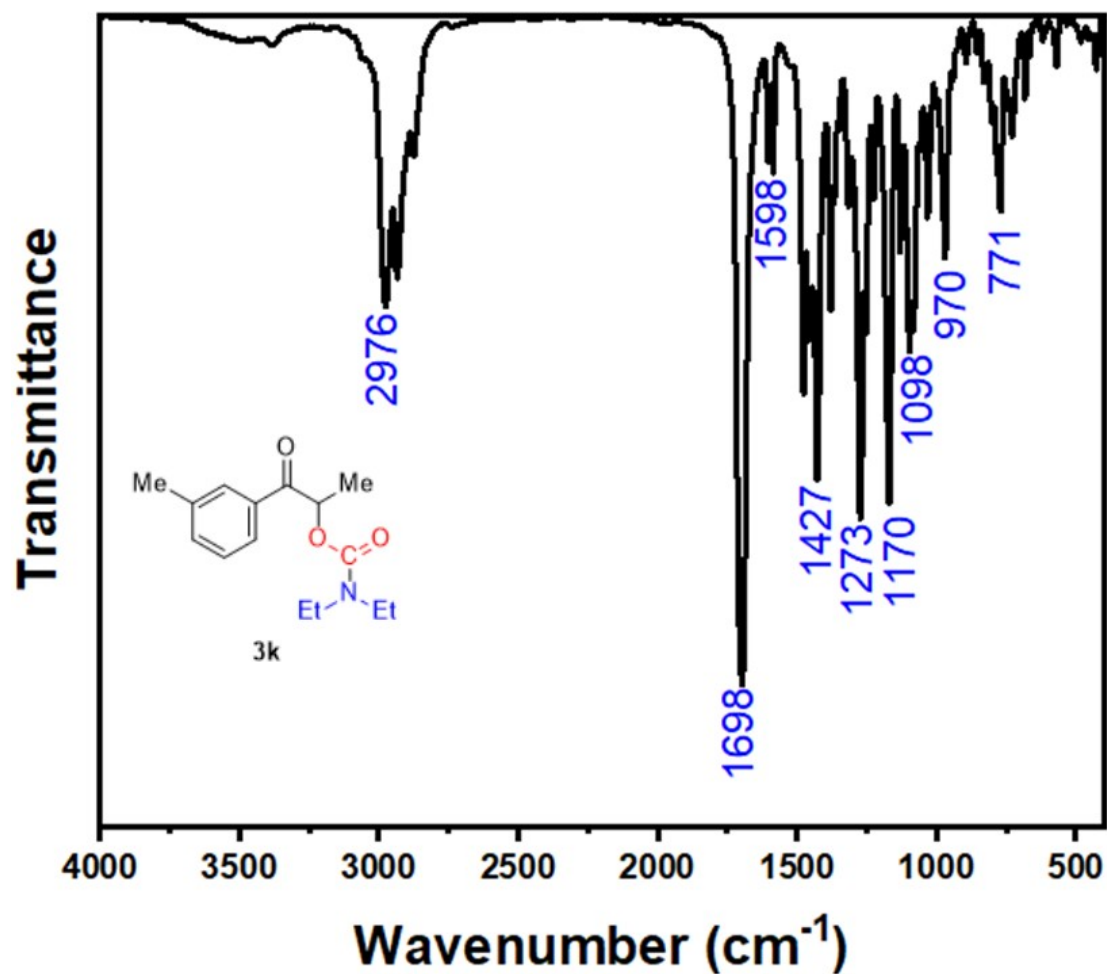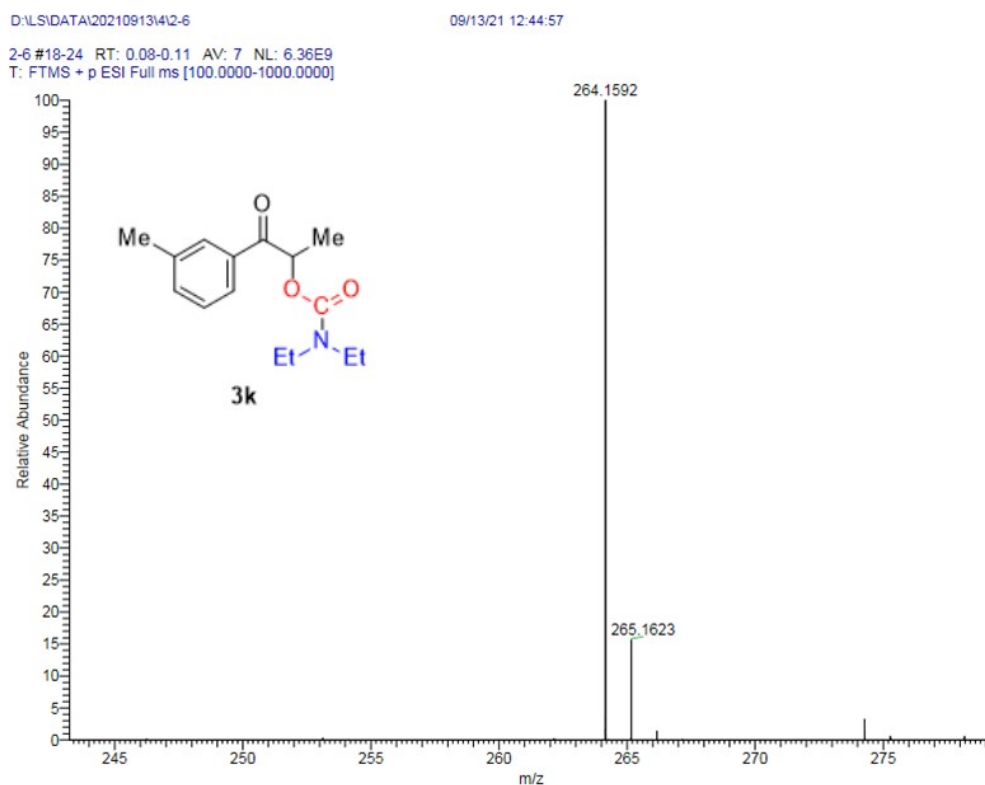

<sup>1</sup>H NMR, <sup>13</sup>C NMR, FT-IR, and HRMS spectra of compound **3k**

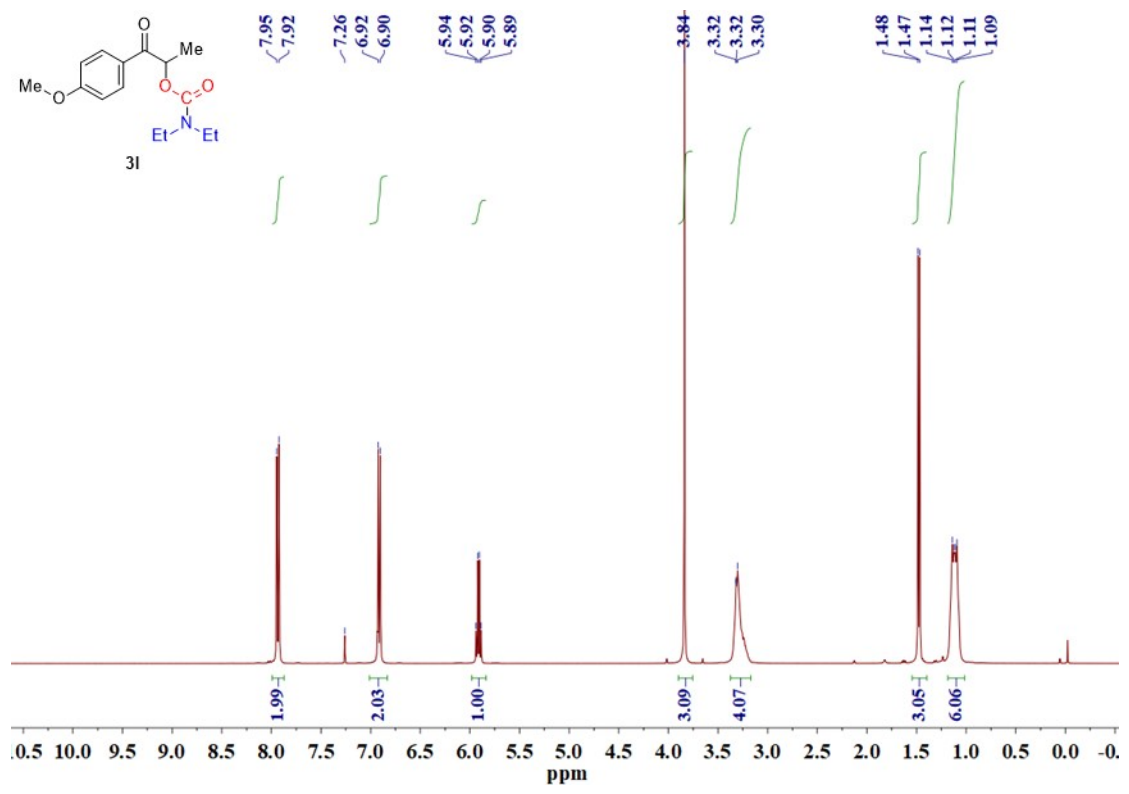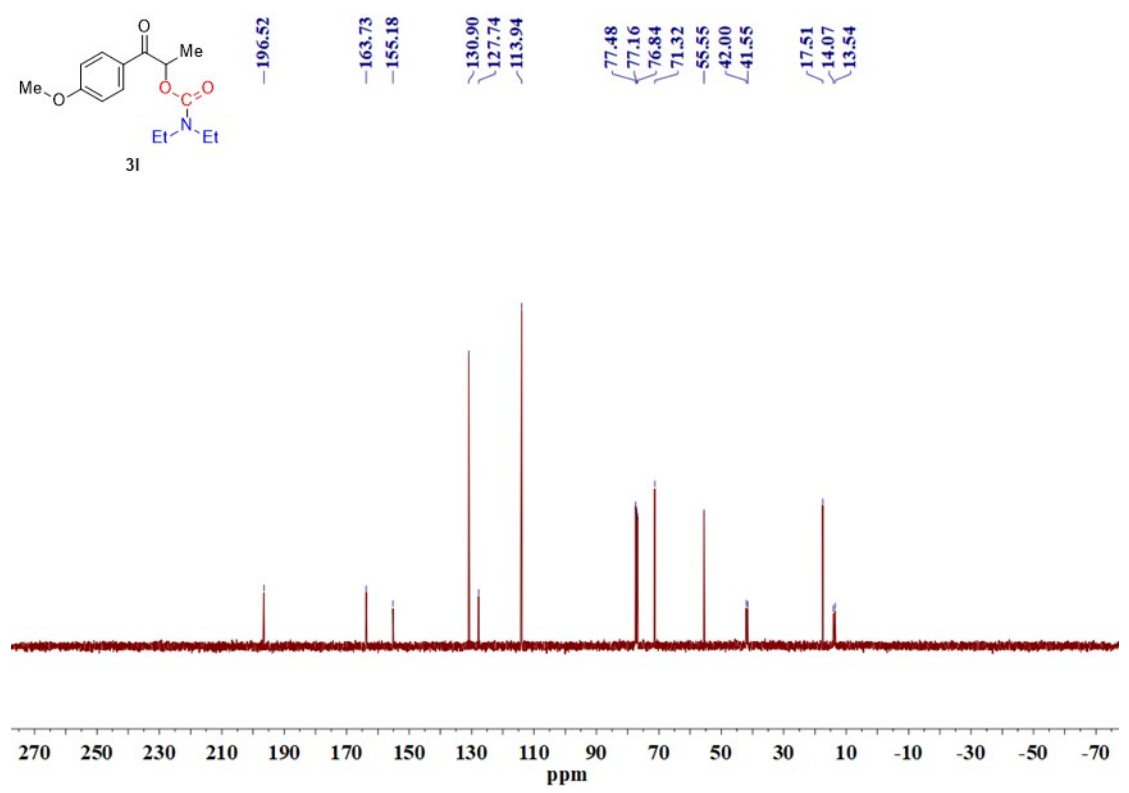

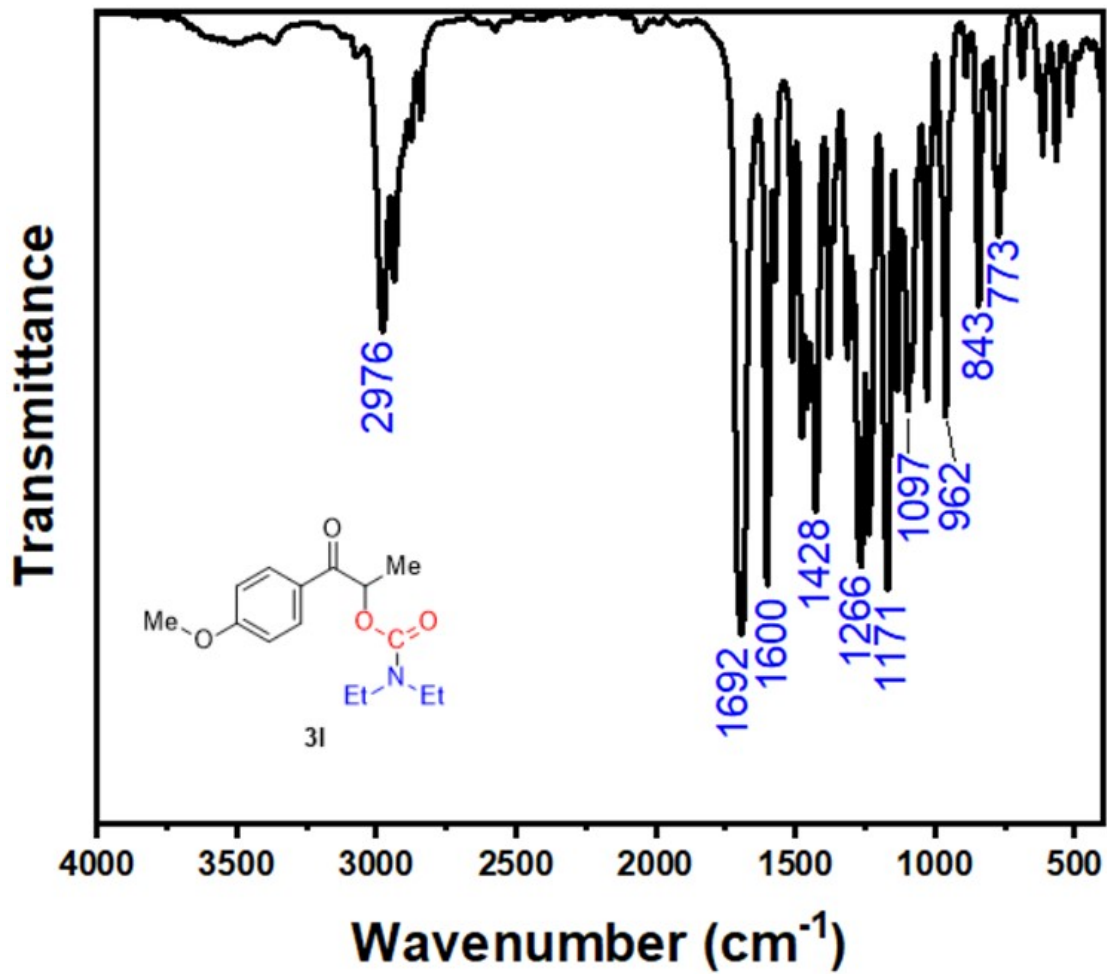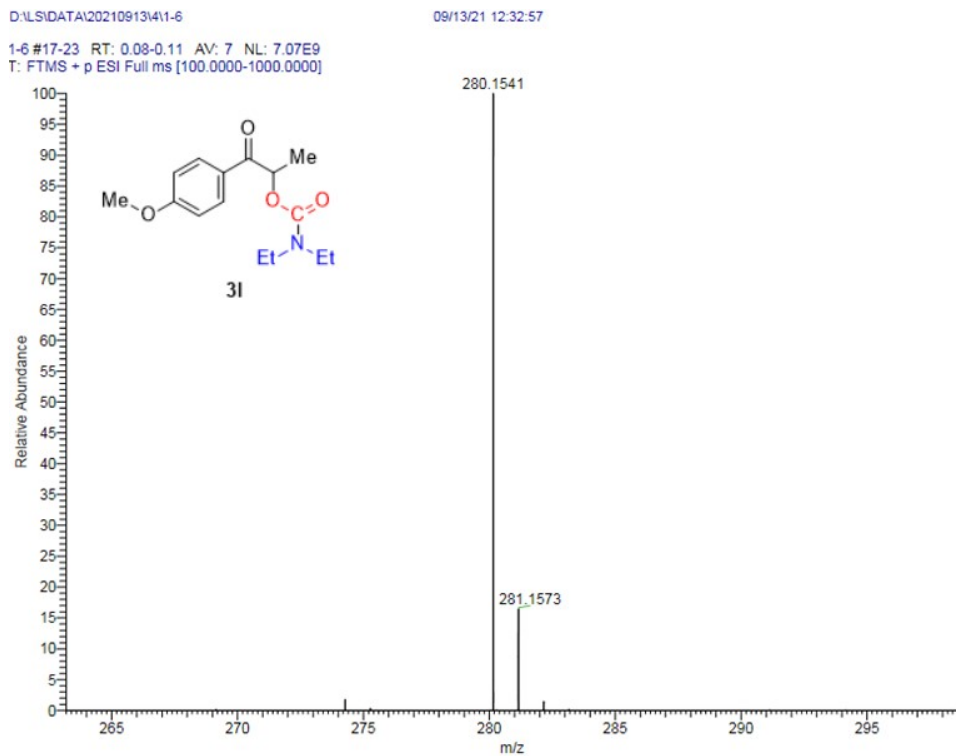

$^1\text{H}$  NMR,  $^{13}\text{C}$  NMR, FT-IR, and HRMS spectra of compound 3I



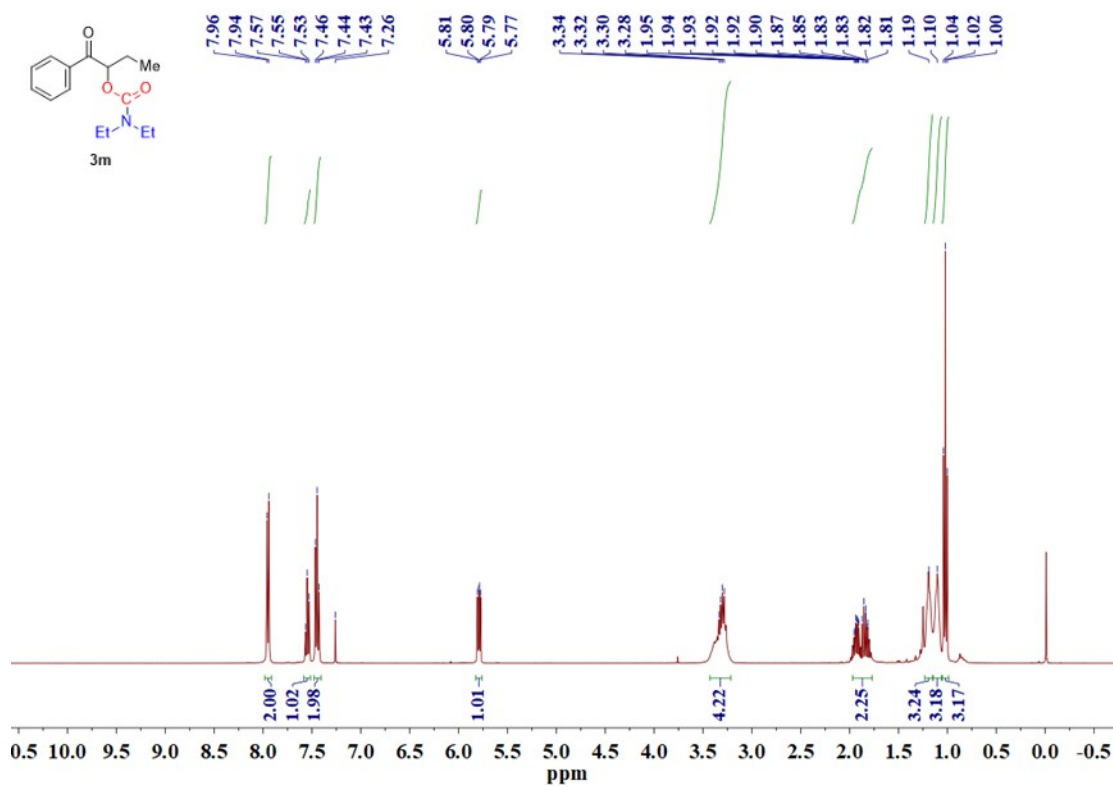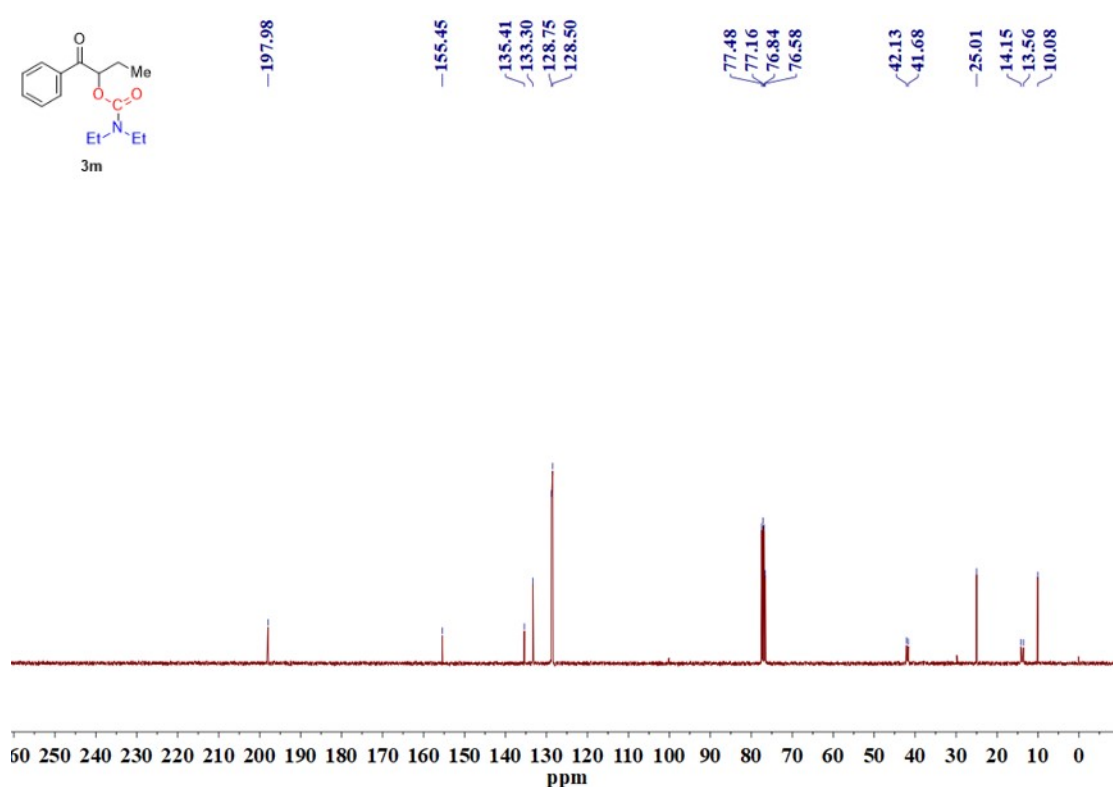

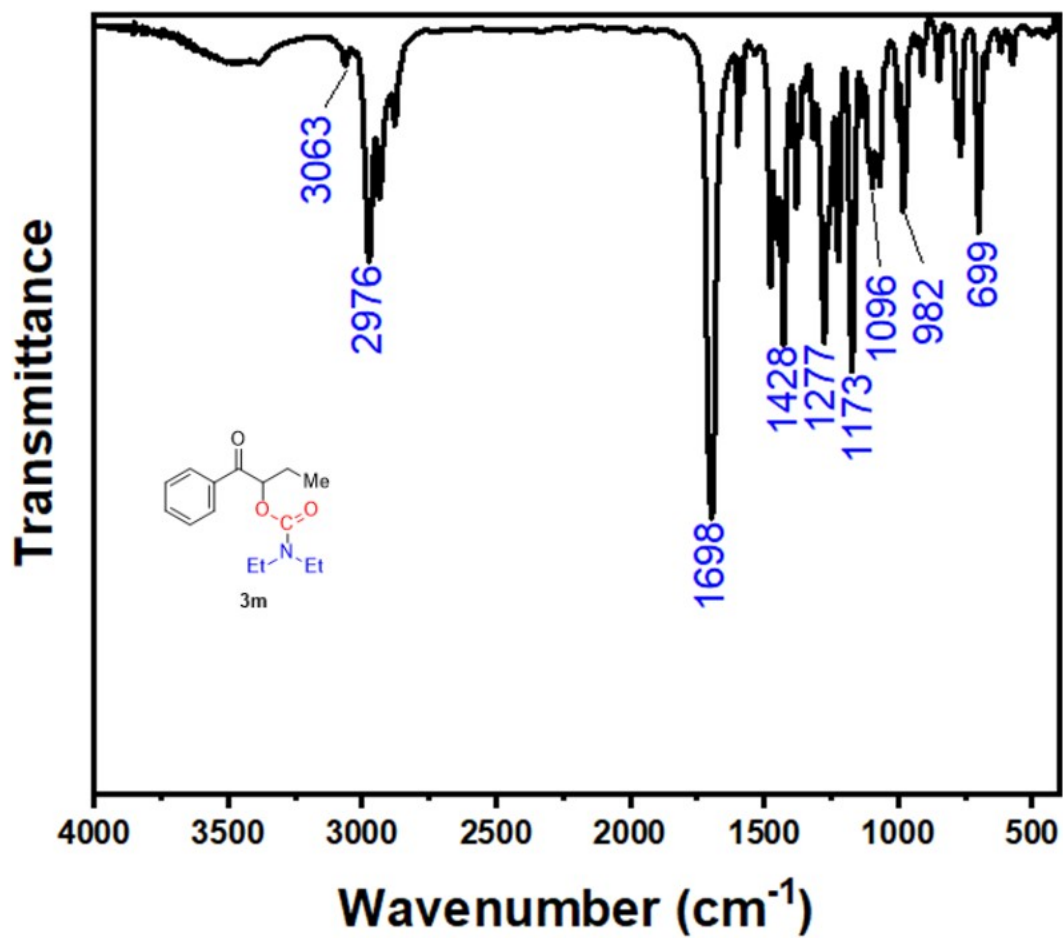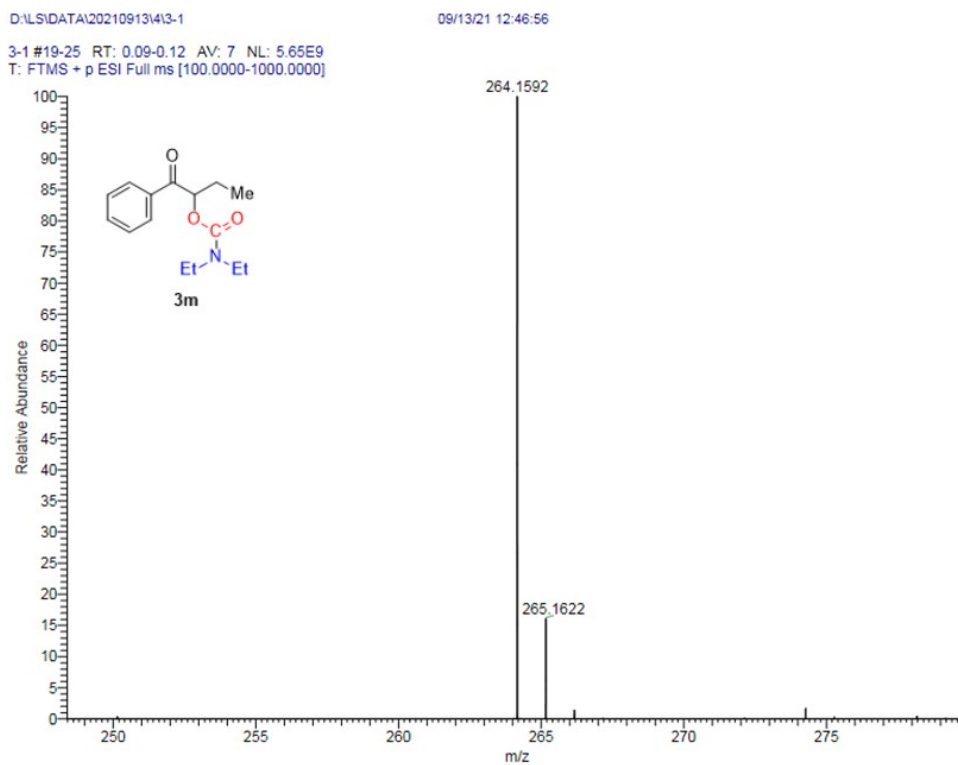

<sup>1</sup>H NMR, <sup>13</sup>C NMR, FT-IR, and HRMS spectra of compound 3m

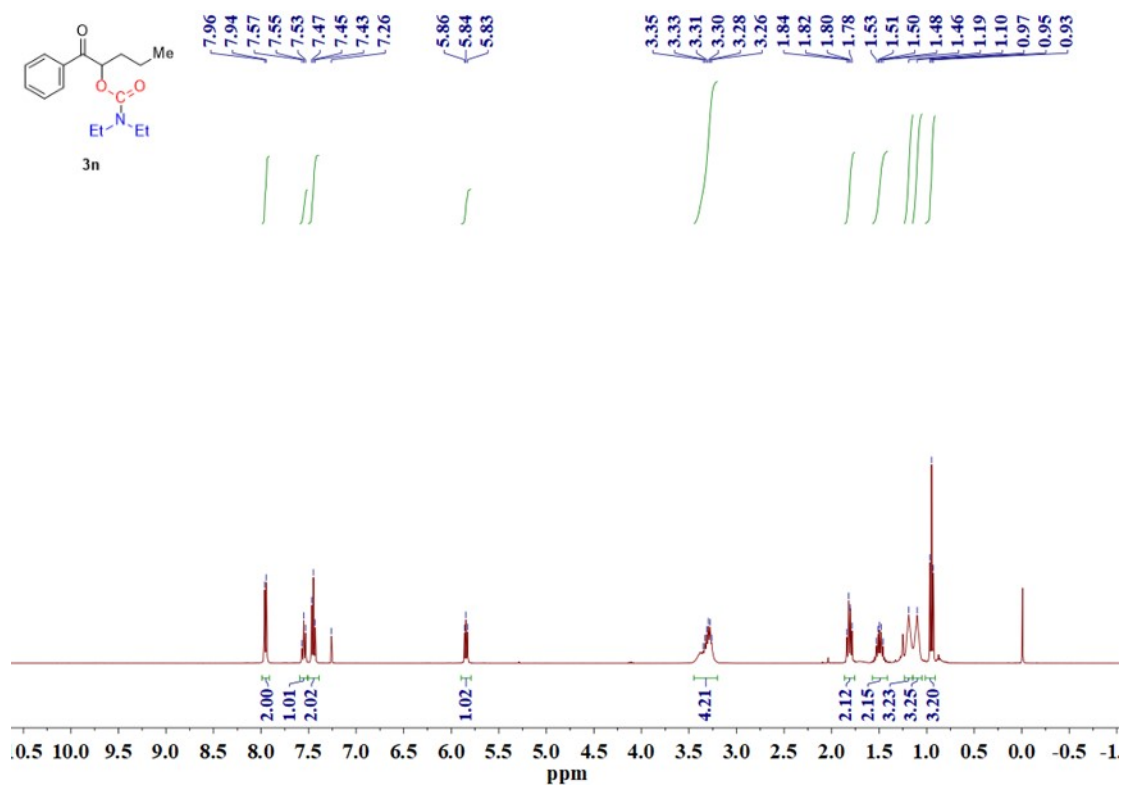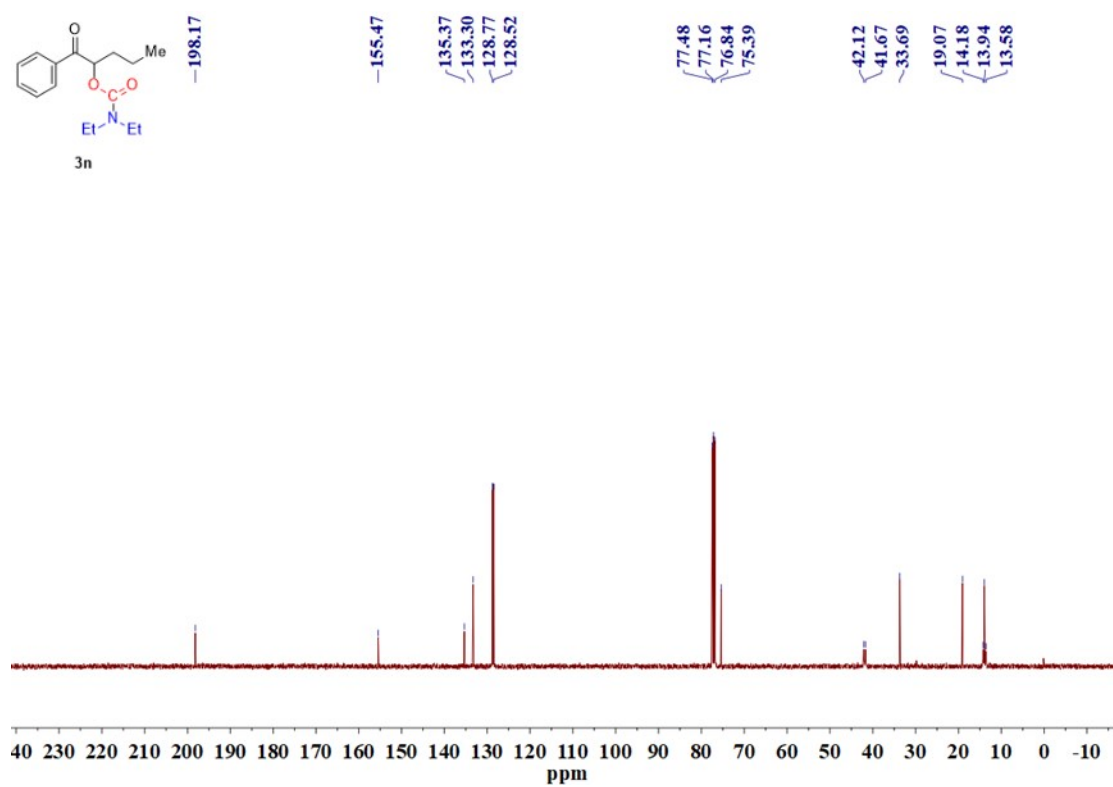

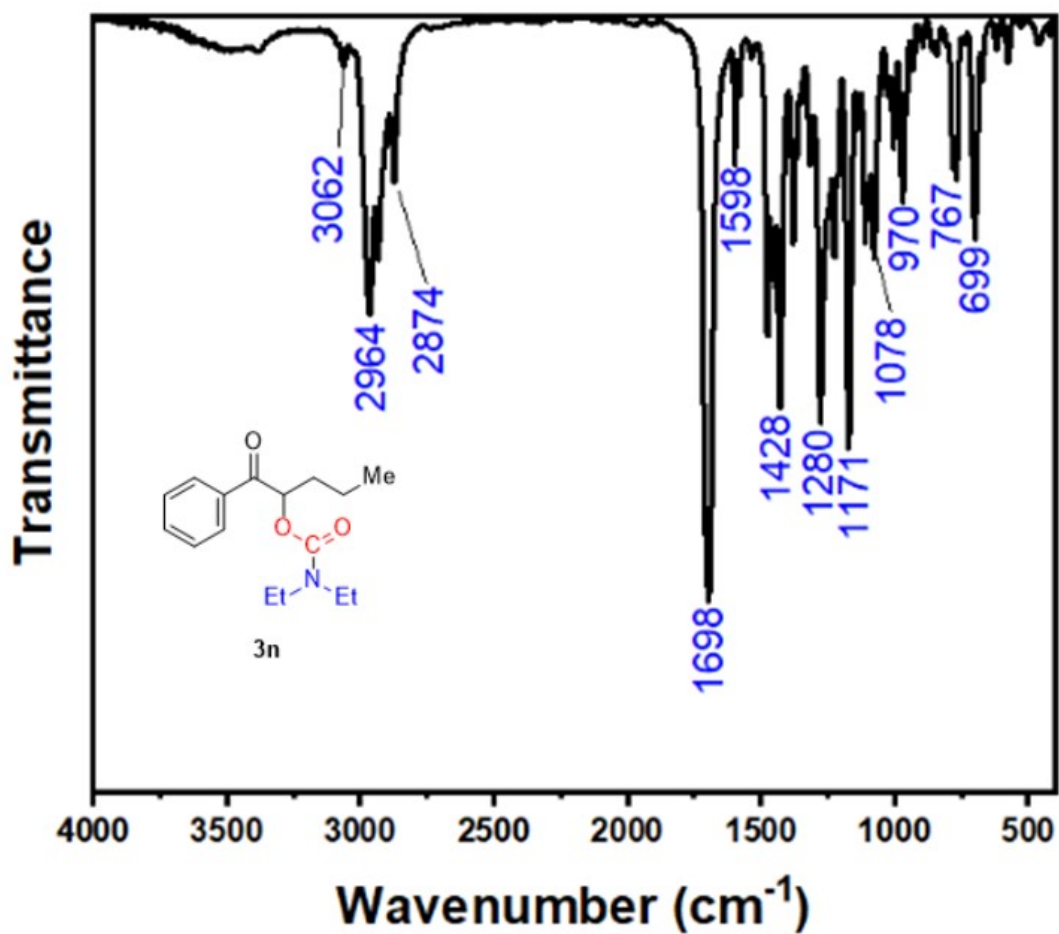

D:\LSIDATA\20210913\4\3-2

09/13/21 12:48:57

3-2 #17-22 RT: 0.08-0.10 AV: 6 NL: 6.97E9  
T: FTMS + p ESI Full ms [100.0000-1000.0000]

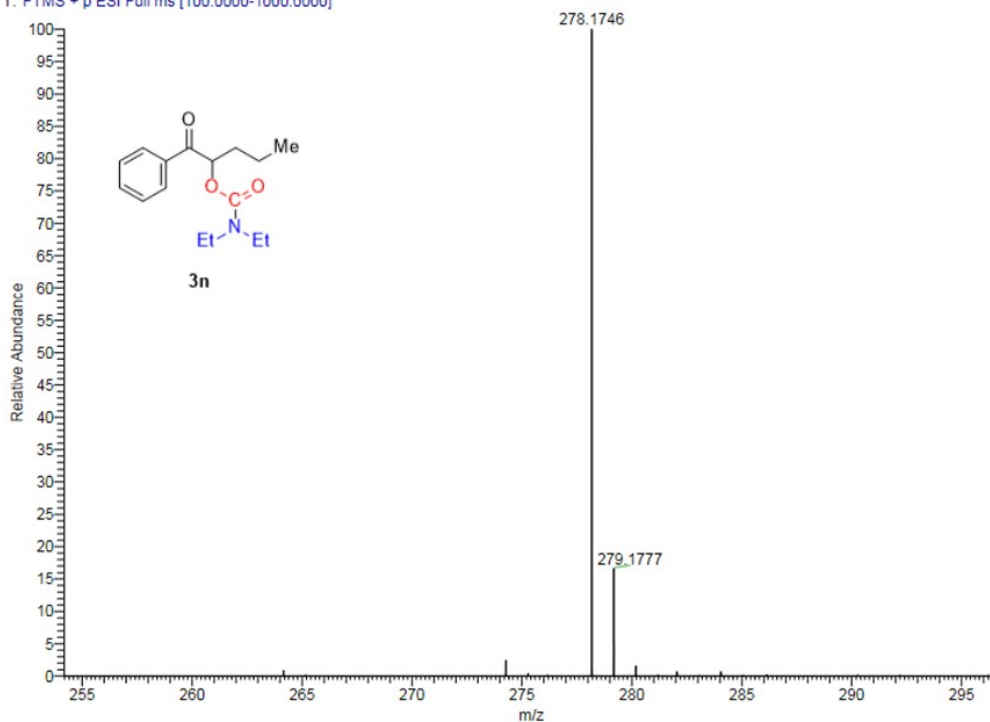

<sup>1</sup>H NMR, <sup>13</sup>C NMR, FT-IR, and HRMS spectra of compound 3n

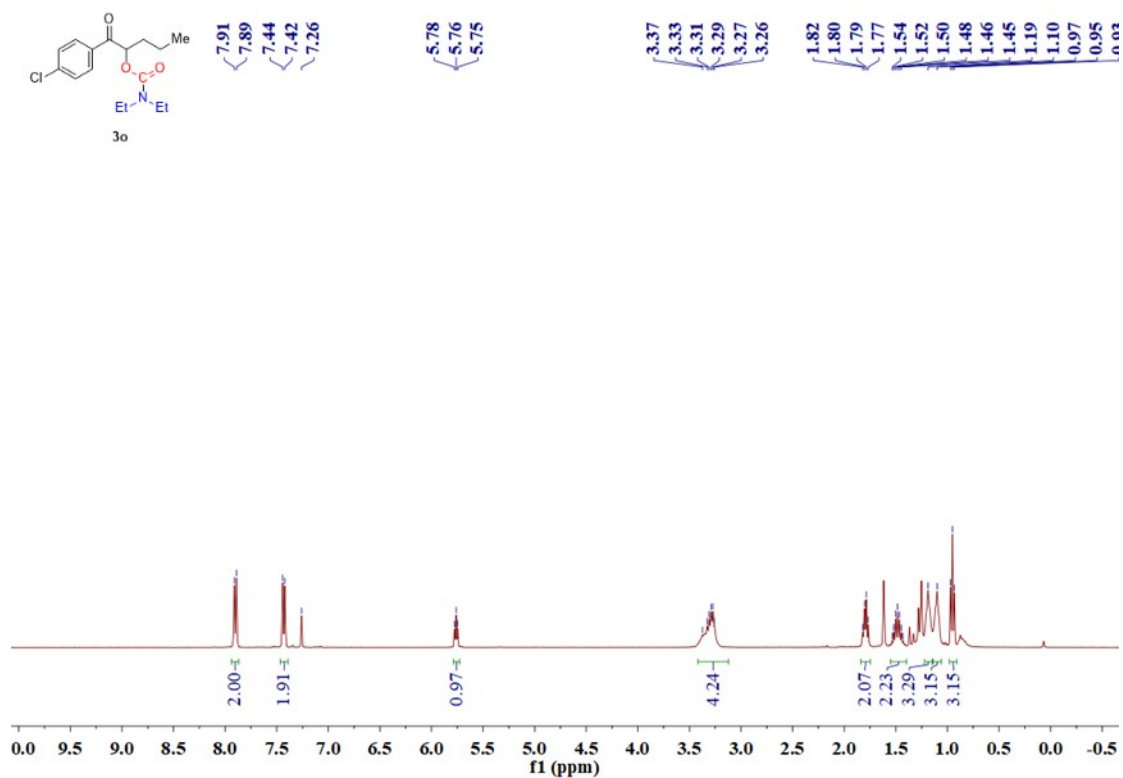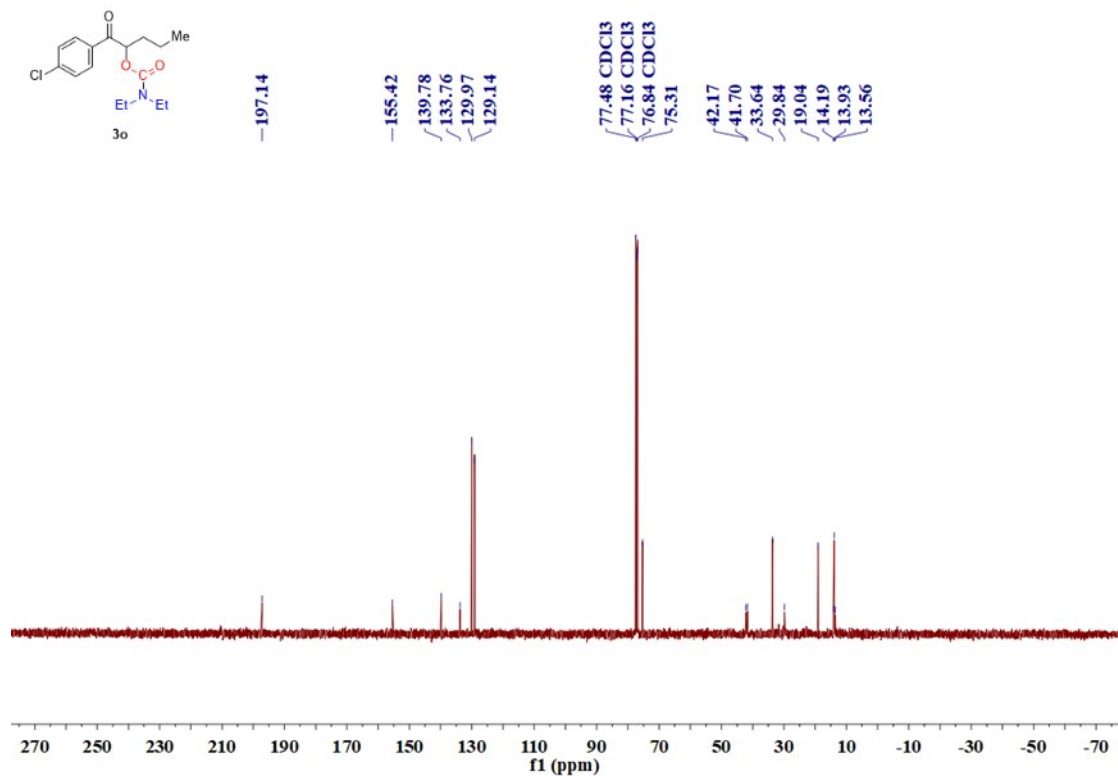

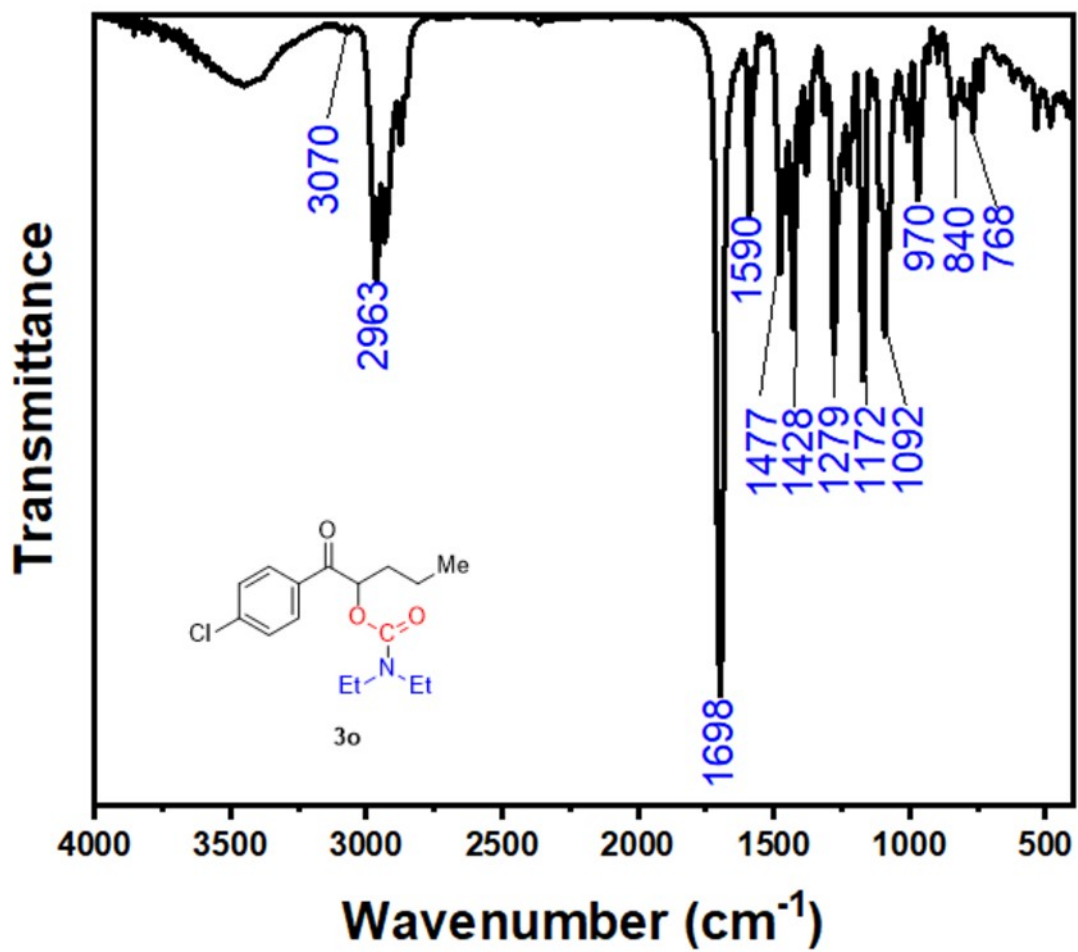

D:\LSIDATA\20210913\43-3

09/13/21 12:50:57

3-3 #16-23 RT: 0.07-0.11 AV: 8 NL: 4.41E9  
T: FTMS + p ESI Full ms [100.0000-1000.0000]

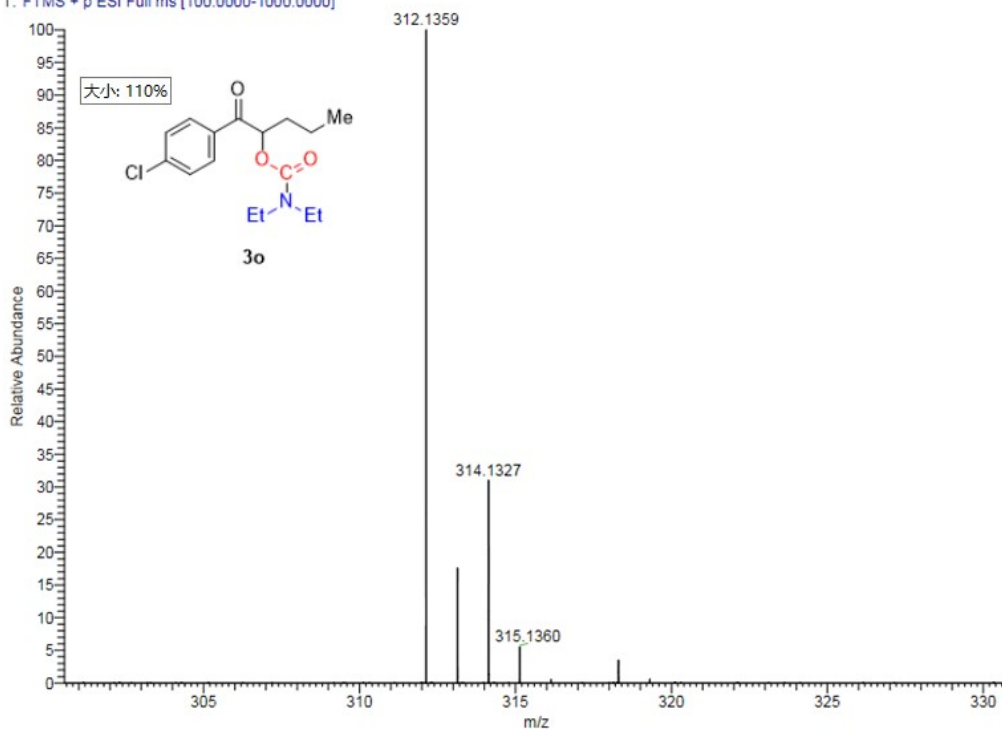

$^1\text{H}$  NMR,  $^{13}\text{C}$  NMR, FT-IR, and HRMS spectra of compound 3o

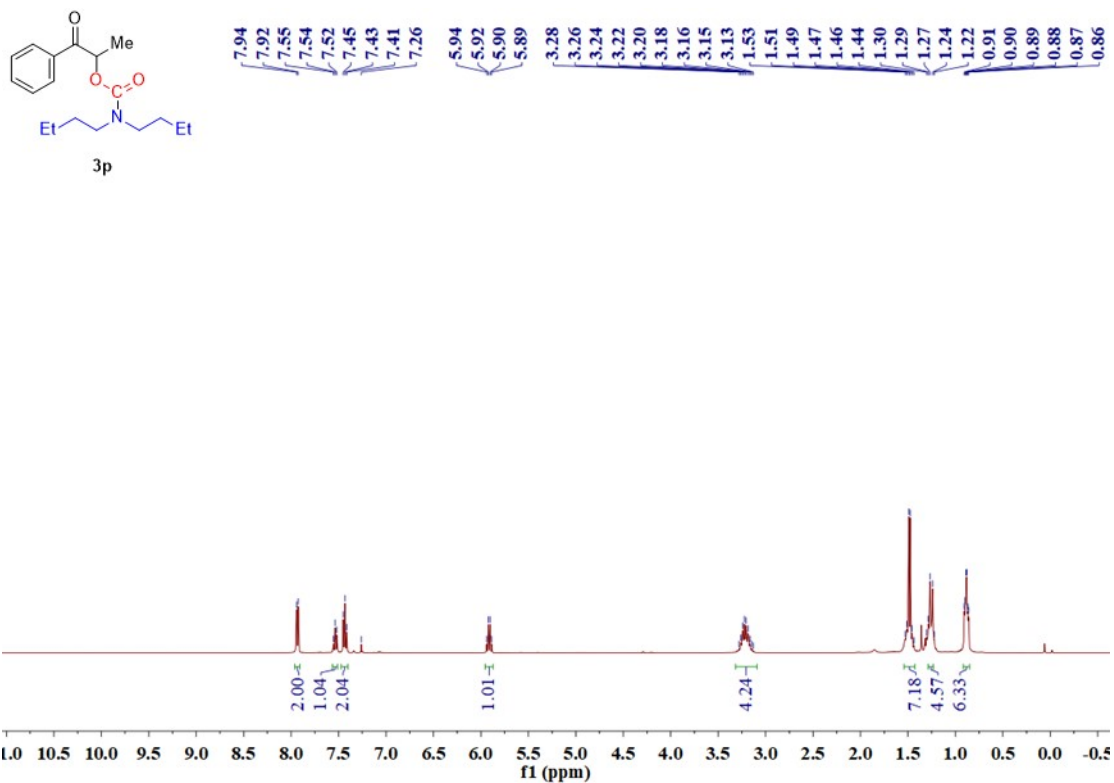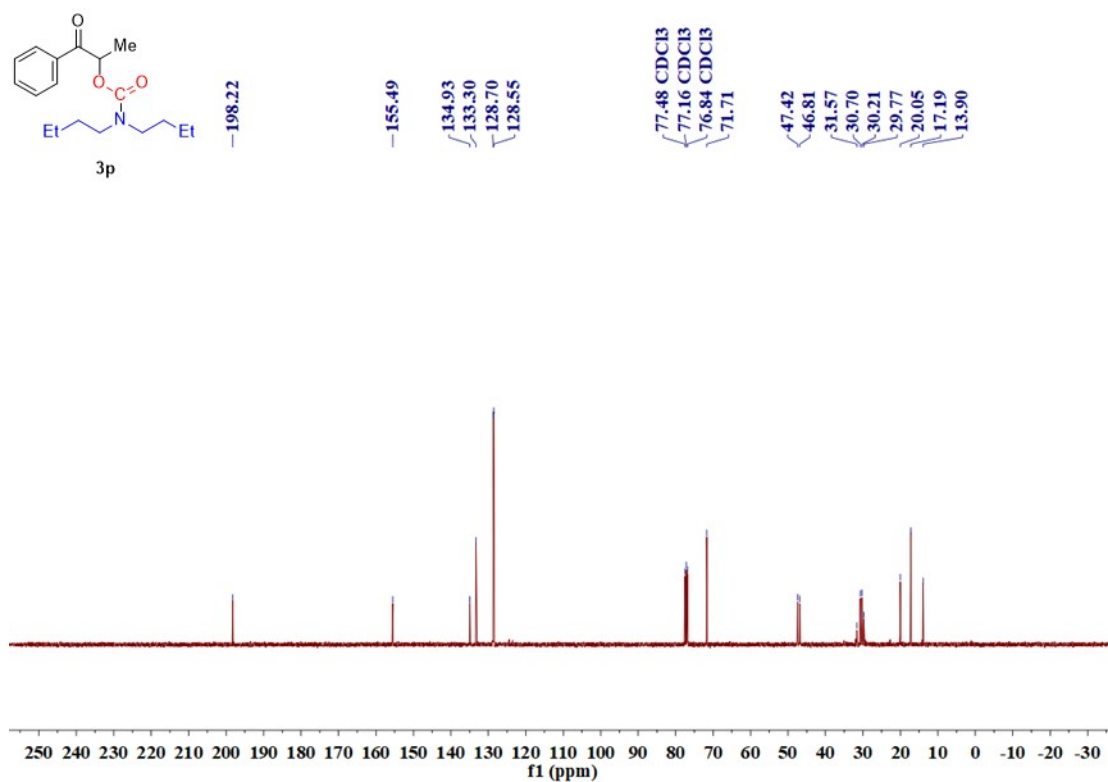

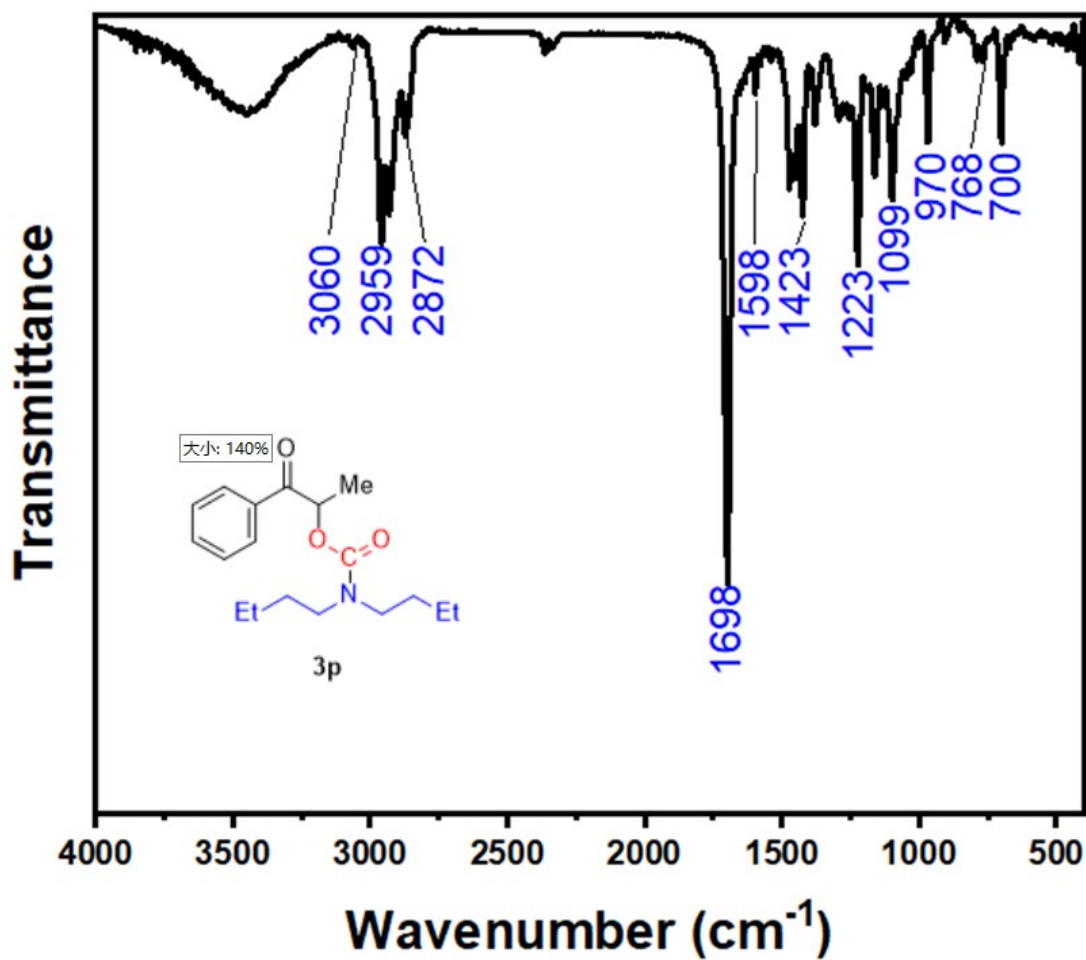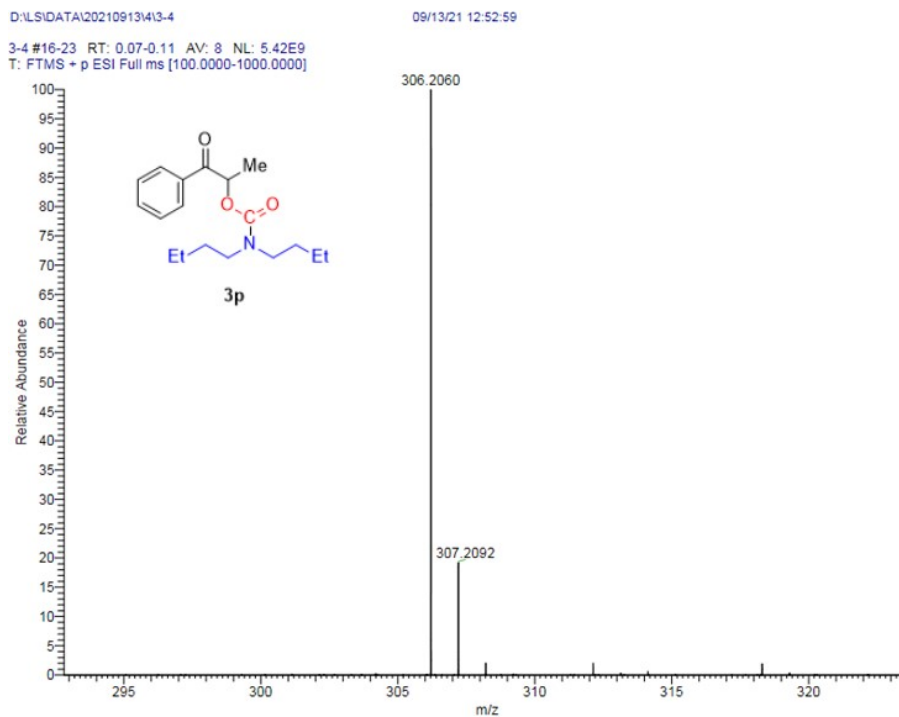

$^1\text{H}$  NMR,  $^{13}\text{C}$  NMR, FT-IR, and HRMS spectra of compound 3p



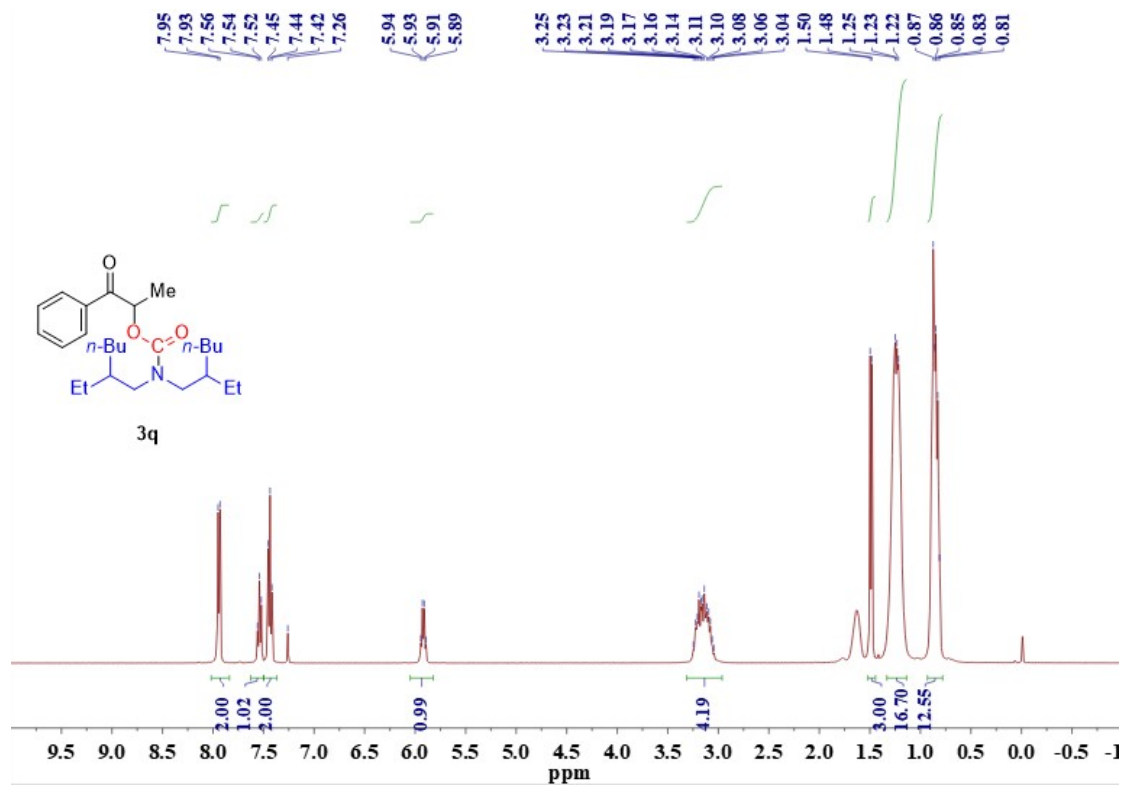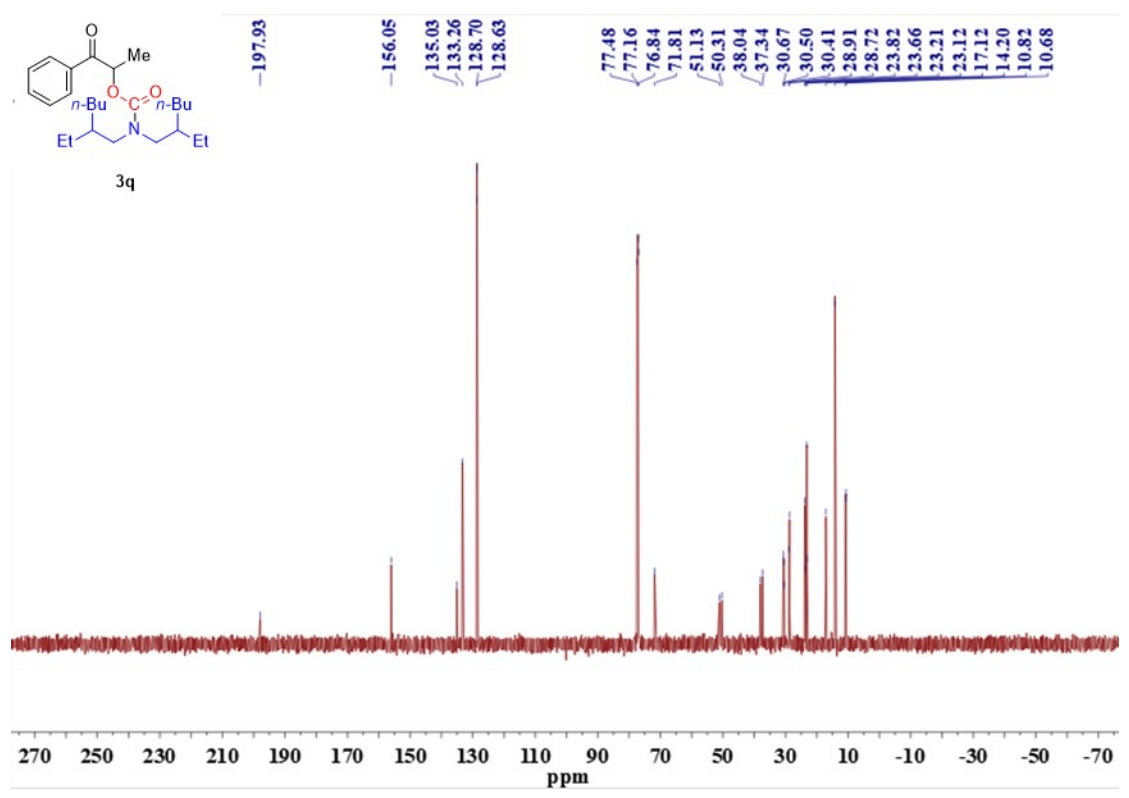

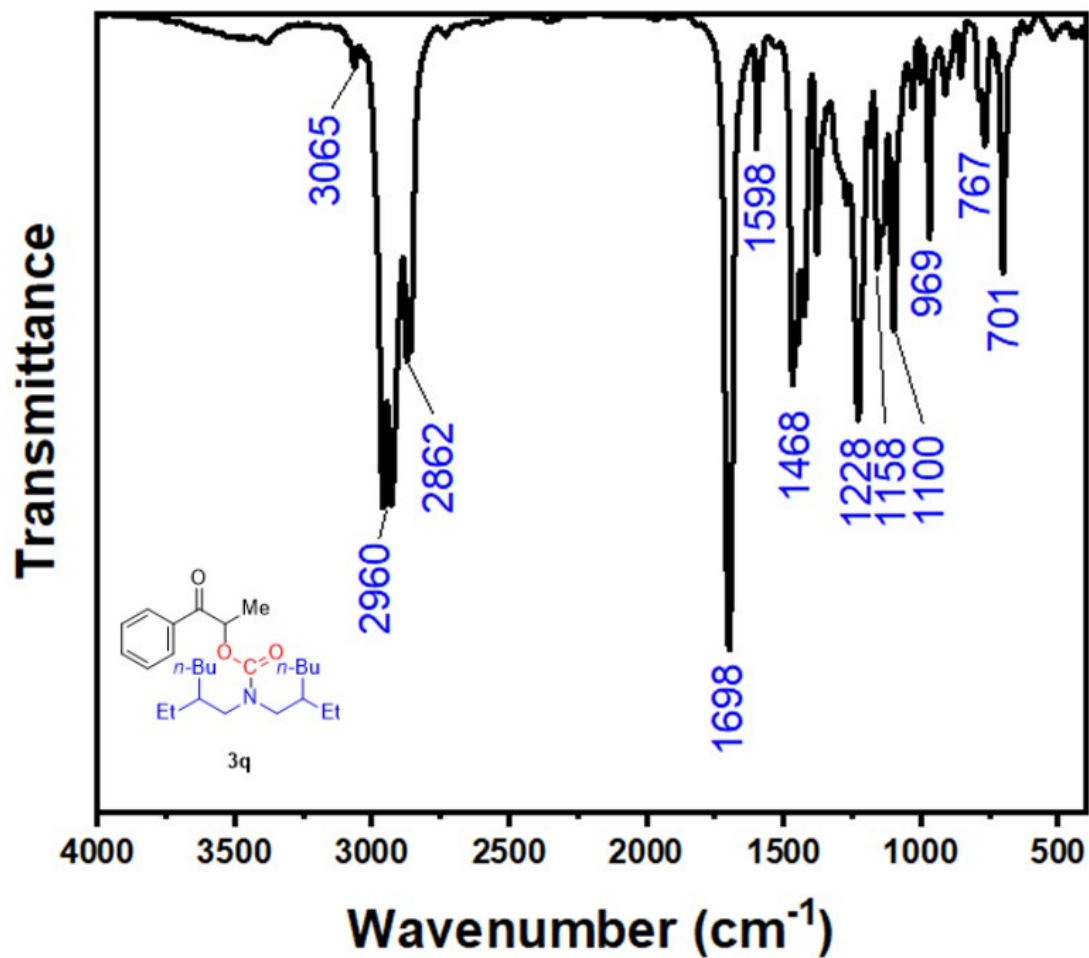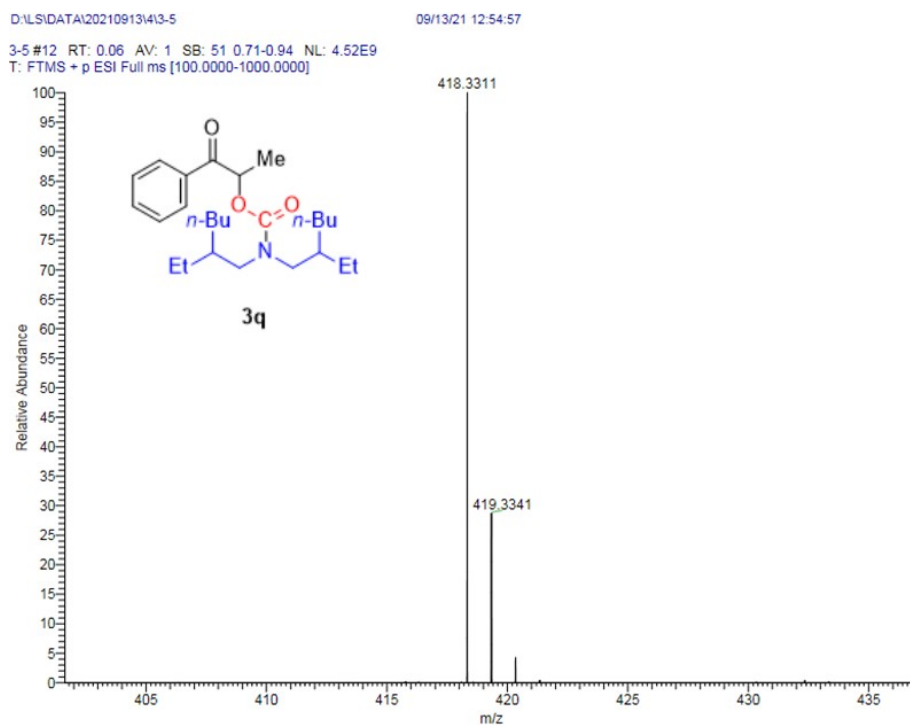

<sup>1</sup>H NMR, <sup>13</sup>C NMR, FT-IR, and HRMS spectra of compound 3q

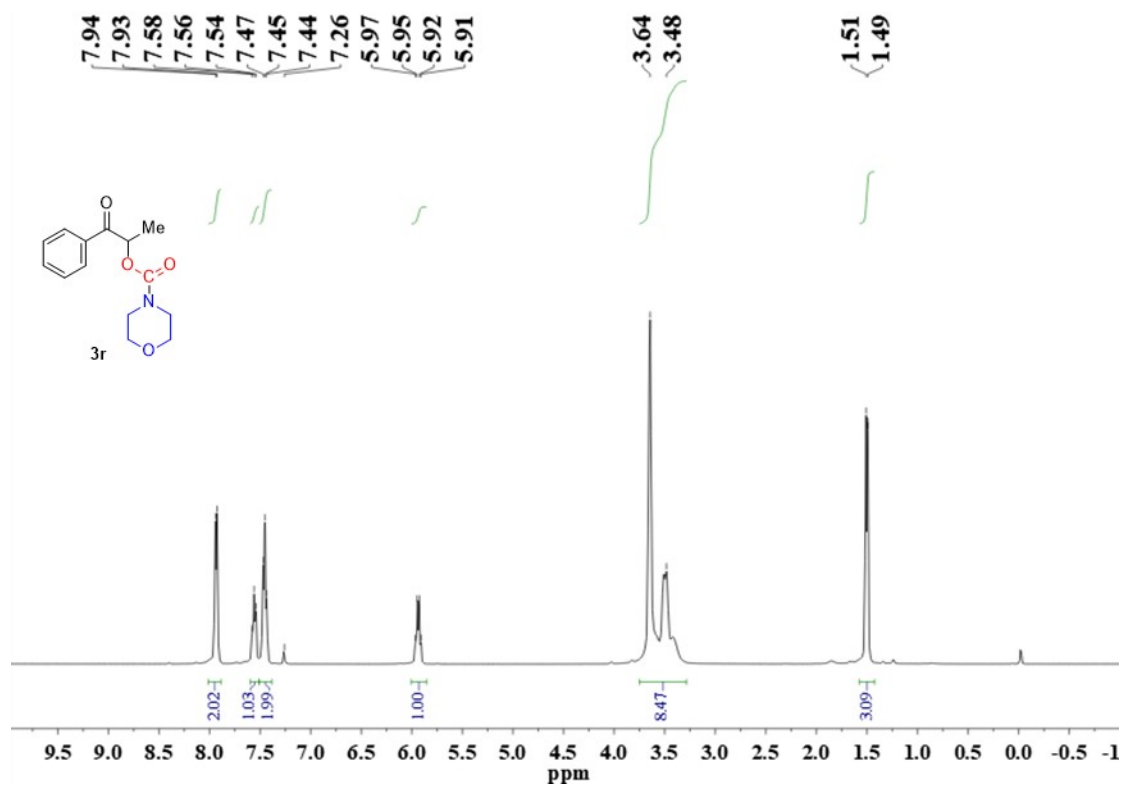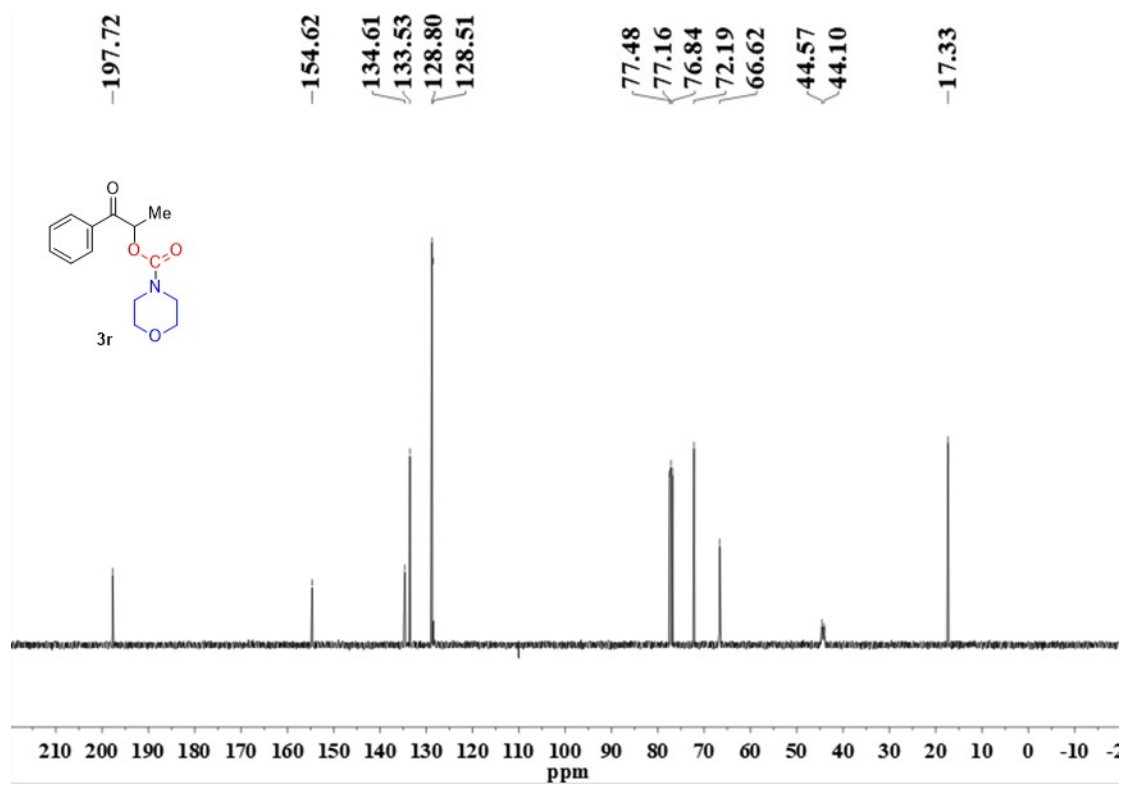

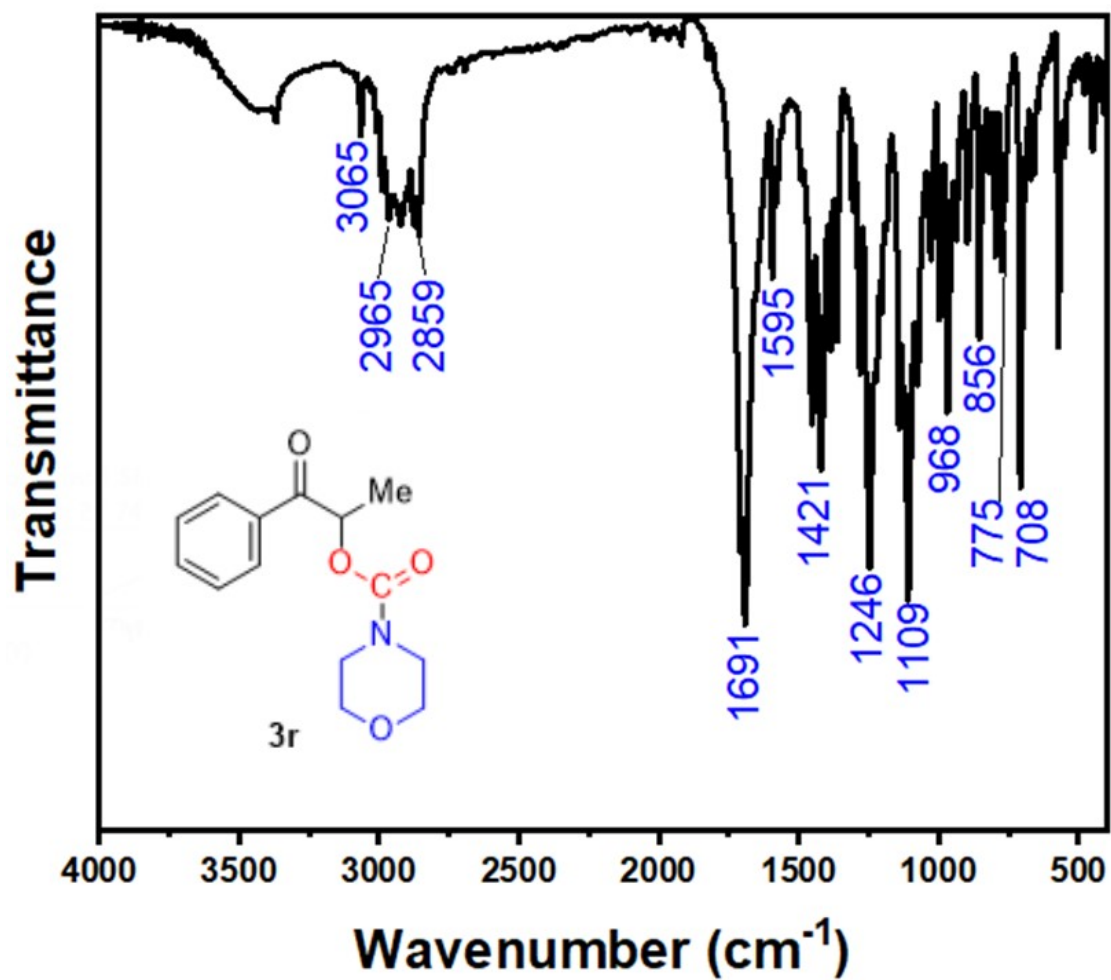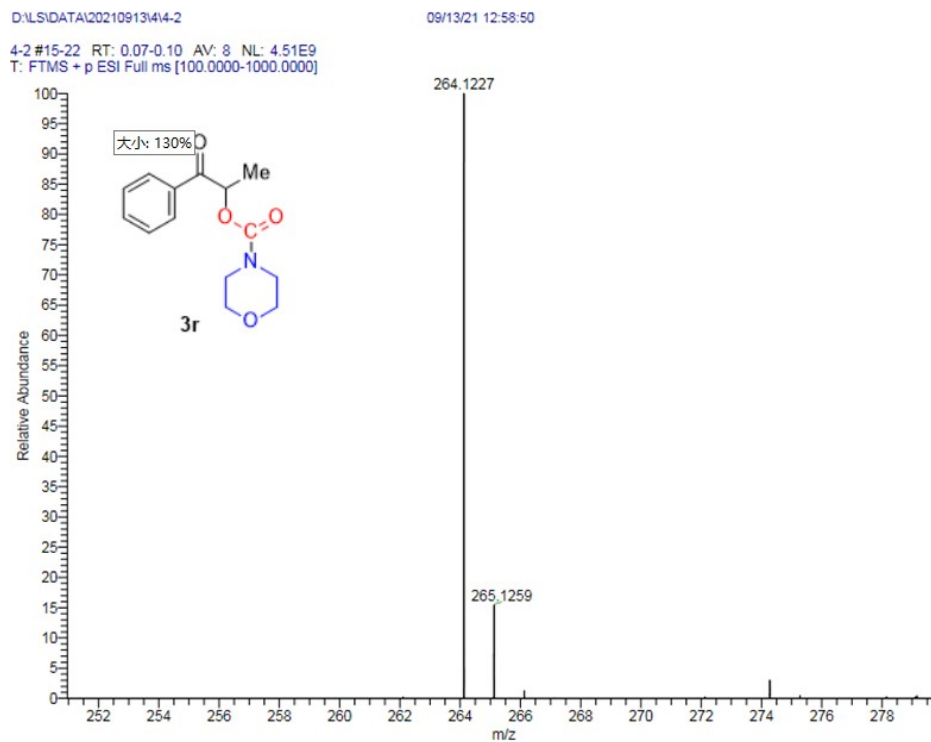

<sup>1</sup>H NMR, <sup>13</sup>C NMR, FT-IR, and HRMS spectra of compound 3r

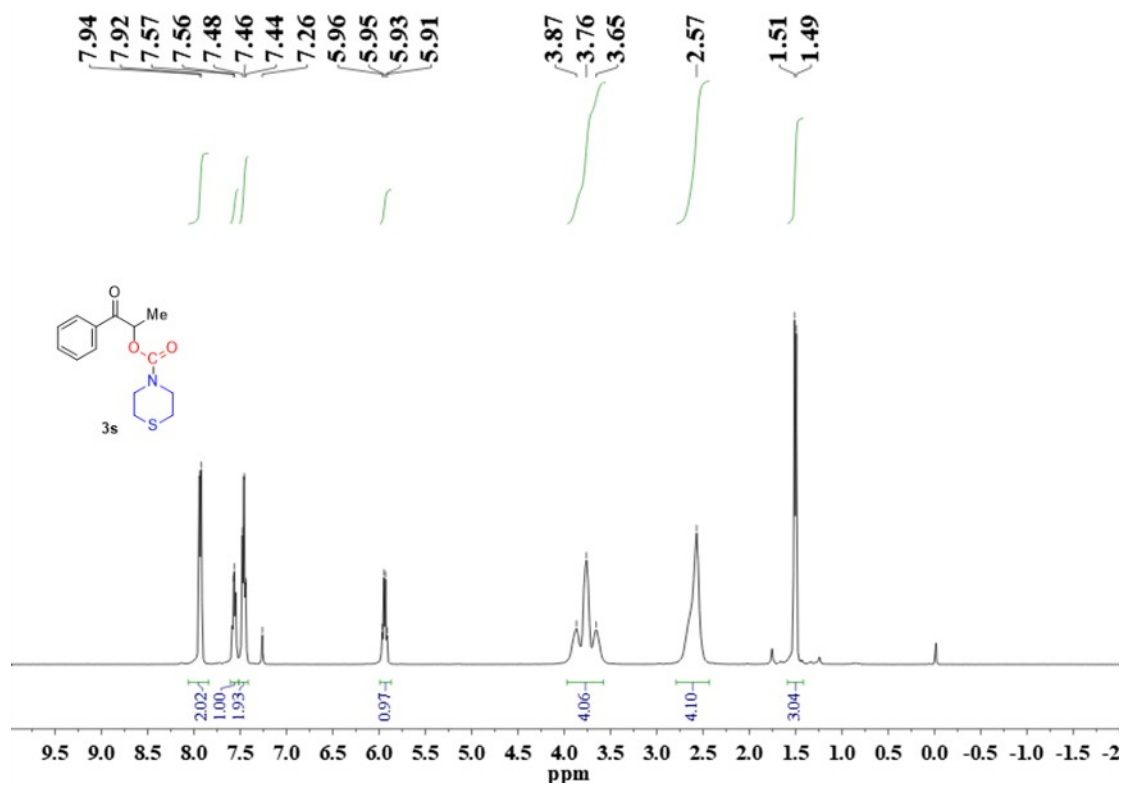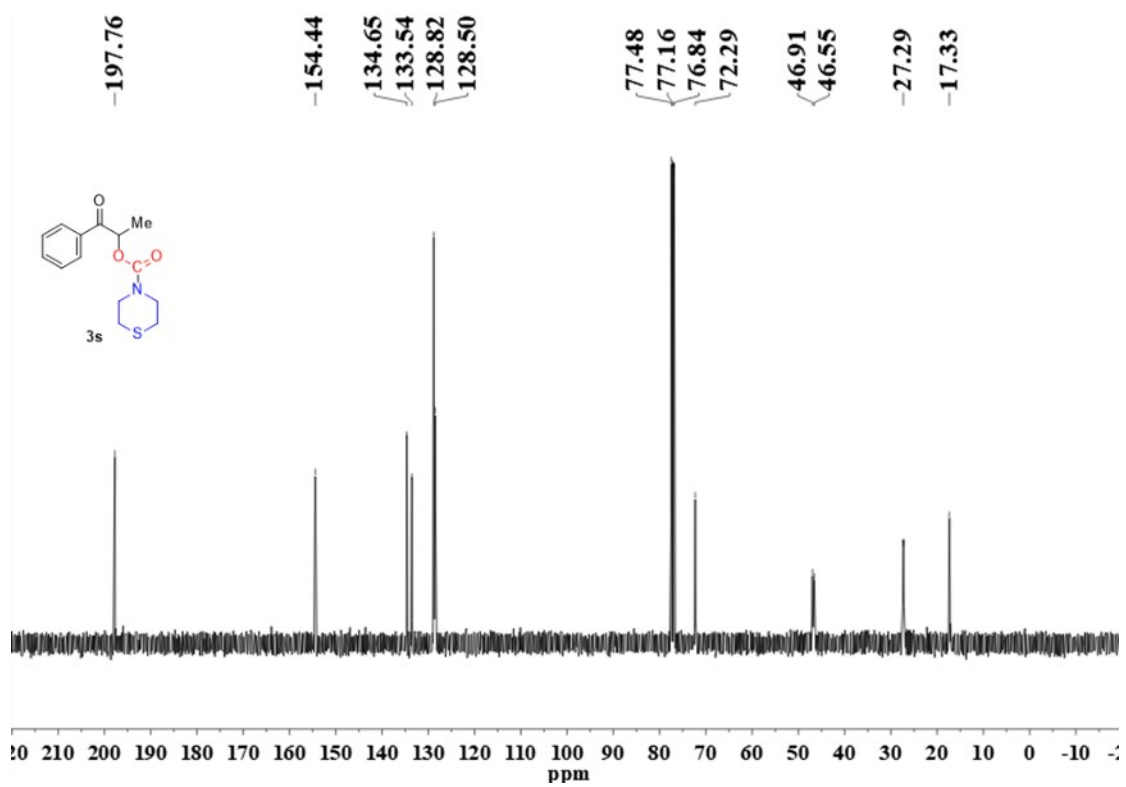

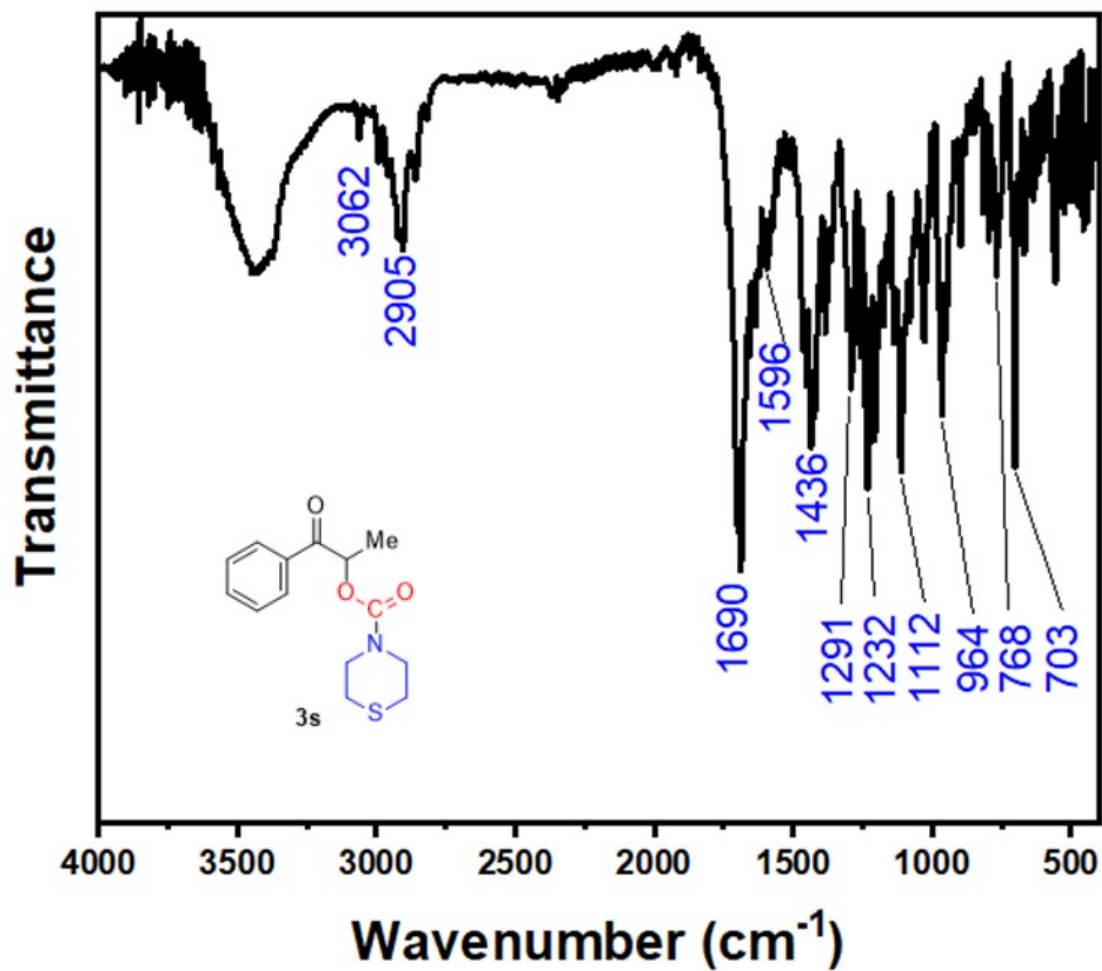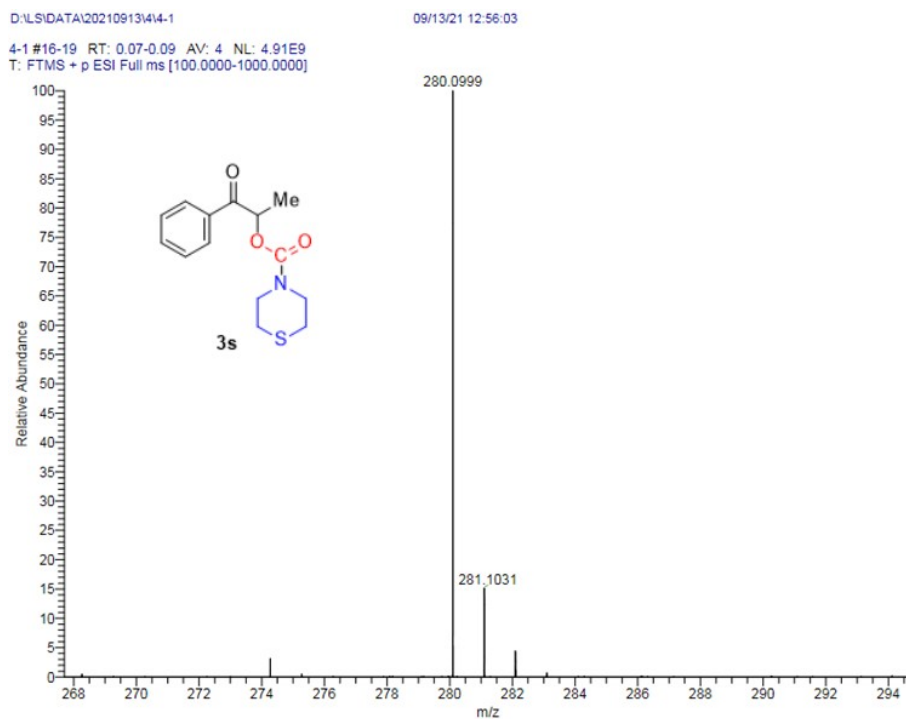

$^1\text{H}$  NMR,  $^{13}\text{C}$  NMR, FT-IR, and HRMS spectra of compound 3s

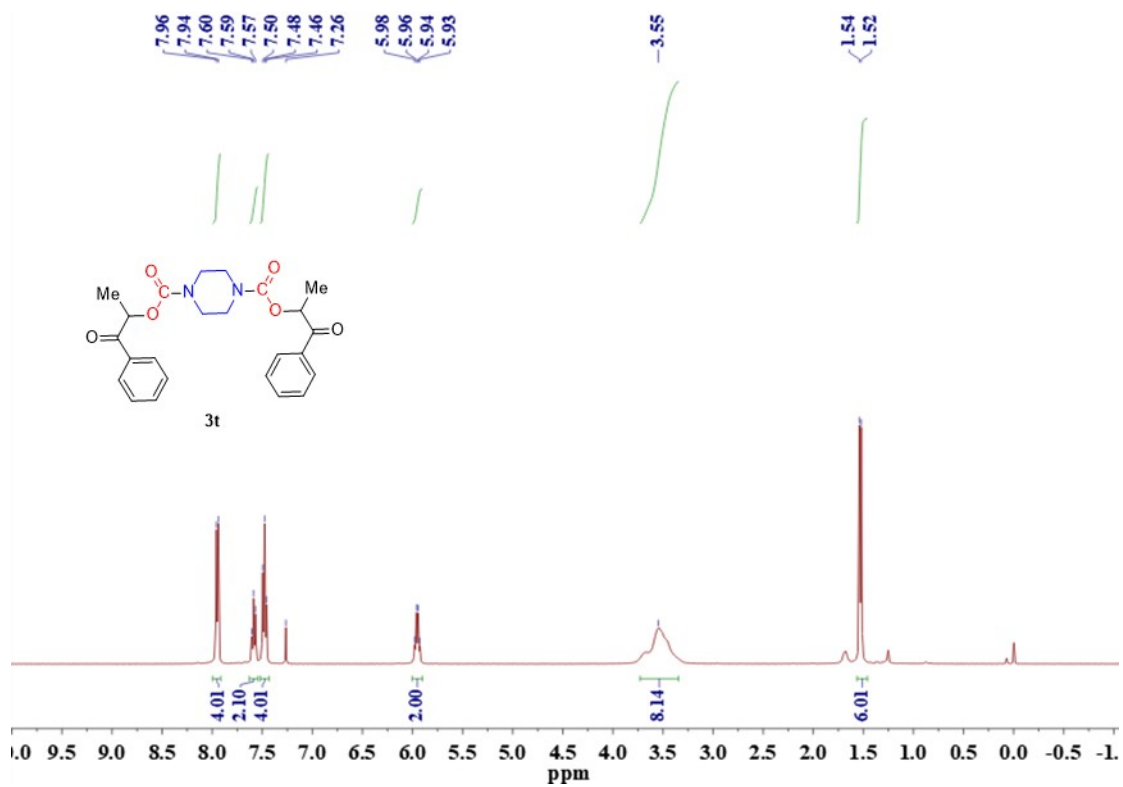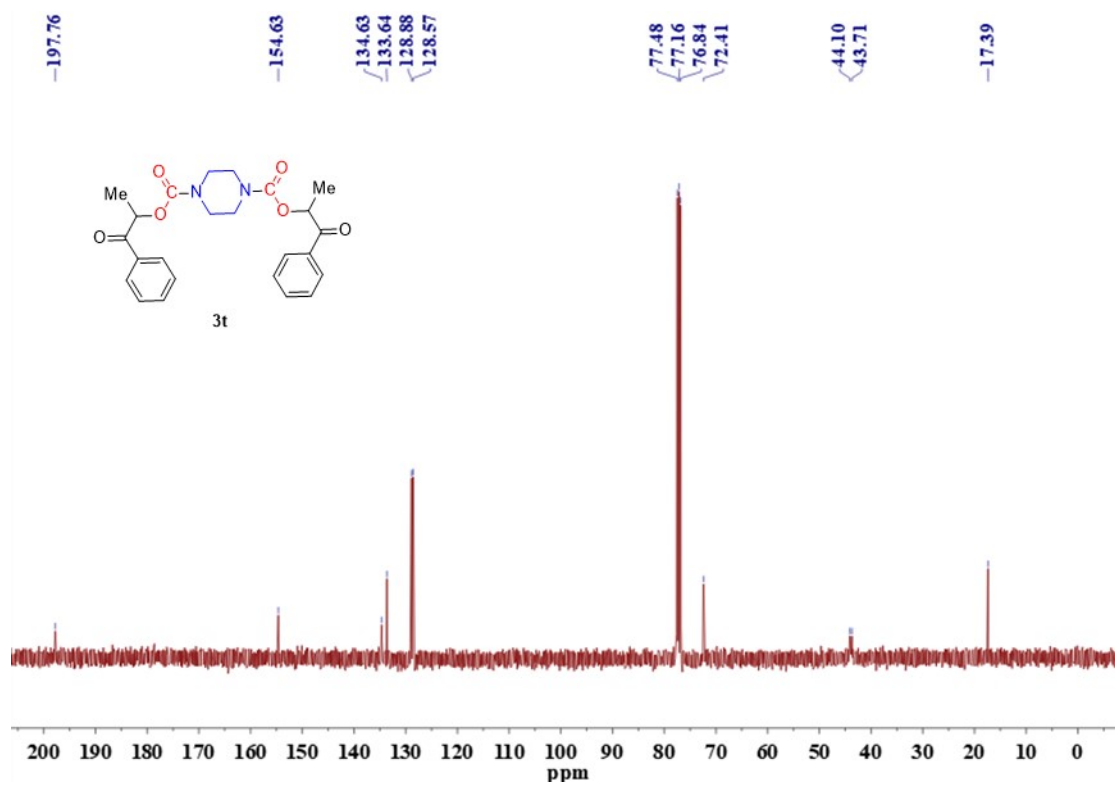

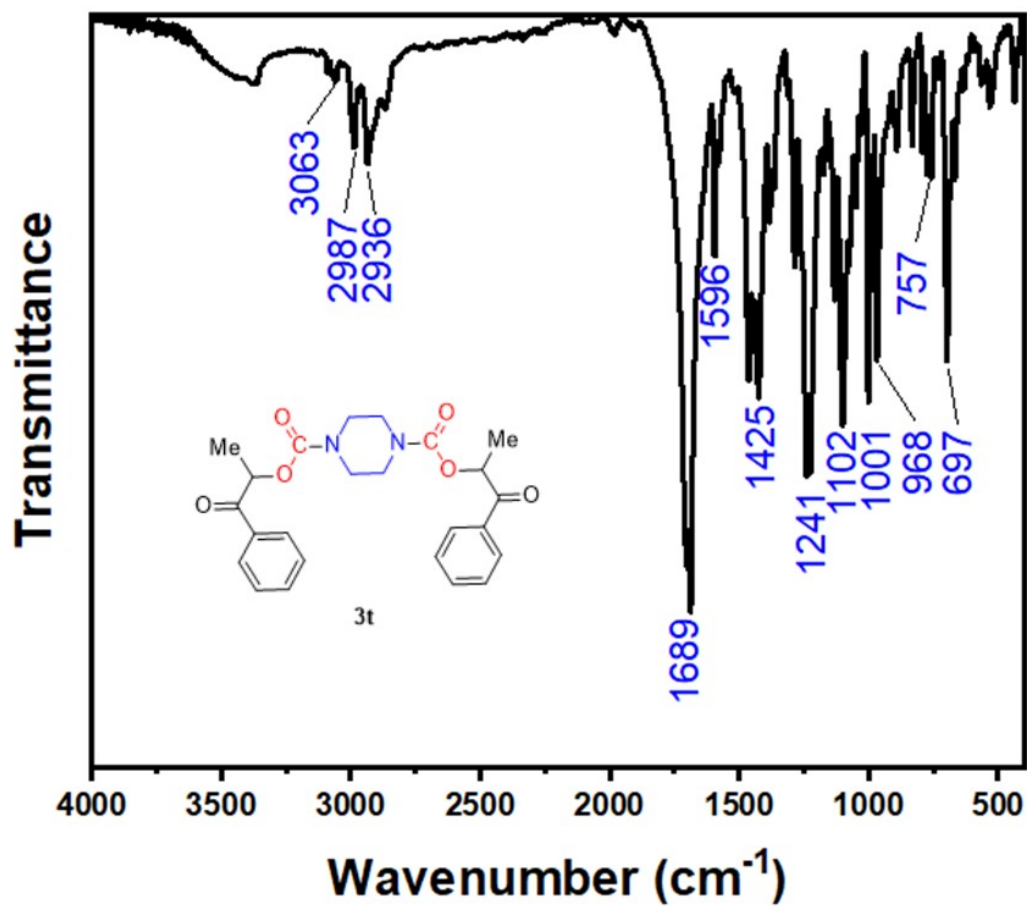

D:\LSIDATA\20210913\414-3

09/13/21 12:59:57

4-3 #16-18 RT: 0.08-0.09 AV: 3 NL: 4.83E9  
T: FTMS + p ESI Full ms [100.0000-1000.0000]

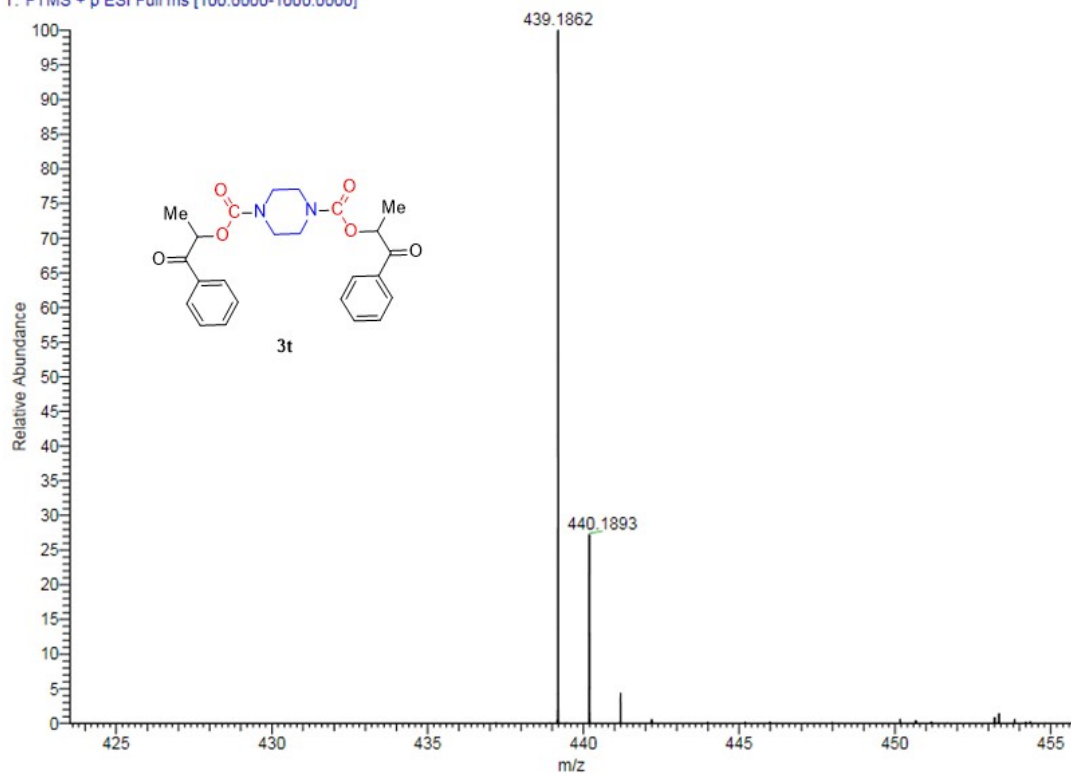

<sup>1</sup>H NMR, <sup>13</sup>C NMR, FT-IR, and HRMS spectra of compound 3t



## V. References

- [S1] E. C. M. Chen, K. Albyn, L. Dussack, *J. Phys. Chem.*, **1989**, *93*, 6827-6832.
- [S2] G. D. Mendenhall, D. M. Golden, S. W. Benson, *J. Phys. Chem.*, **1973**, *77*, 2707-2709.
- [S3] L. Song, L. Zhang, S. Z. Luo, J. P. Cheng, *Chem. Eur. J.*, **2014**, *20*, 14231-14234.
- [S4] <http://ibond.nankai.edu.cn>
